# Supplementary material for: Total synthesis of (+)-oridamycins A and B
Source: Royal Society of Chemistry journal article supplement (doi:10.1039/d4cc03070b), 2024-01-01
Supplement: d4cc03070b1.pdf [file d4cc03070b1.pdf]

## Spectral Data

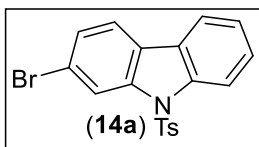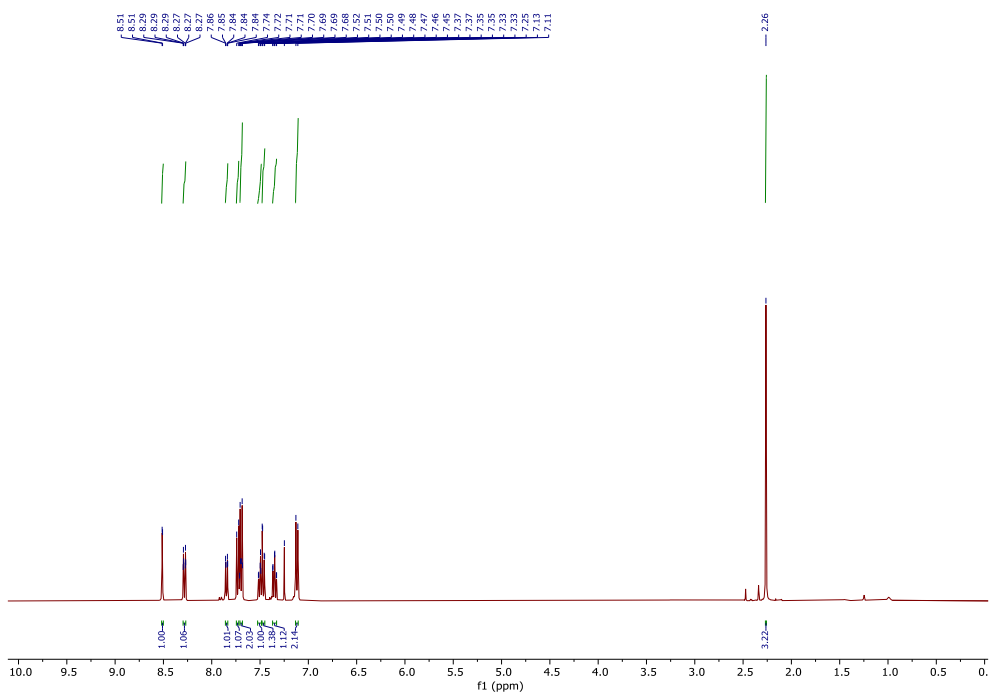

$^1\text{H}$  NMR (400 MHz,  $\text{CDCl}_3$ ) of **14a**

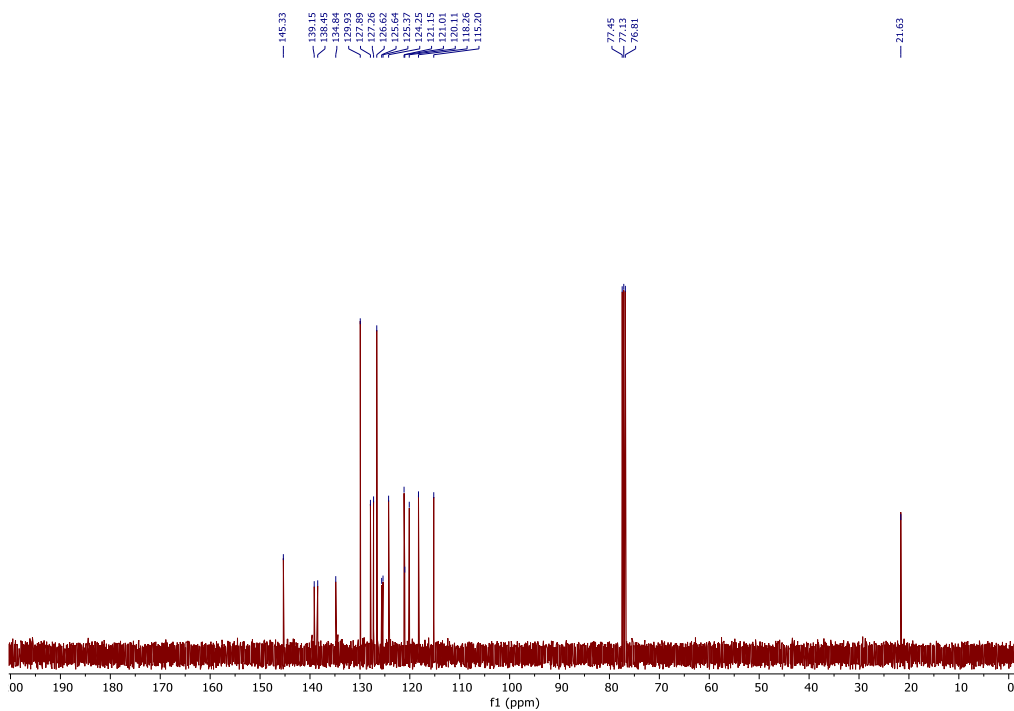

$^{13}\text{C}$  NMR (101 MHz,  $\text{CDCl}_3$ ) of **14a**

# Display Report

## Analysis Info

Analysis Name D:\Data\User data\2022\JULY\ab\_ram\_242.d  
Method Tune\_pos\_Standard\_July2022.m  
Sample Name ab\_ram\_242  
Comment

Acquisition Date 7/22/2022 1:30:31 PM

Operator IISER Kolkata  
Instrument maXis impact 8282001.00127

## Acquisition Parameter

|             |          |                      |          |                  |           |
|-------------|----------|----------------------|----------|------------------|-----------|
| Source Type | ESI      | Ion Polarity         | Positive | Set Nebulizer    | 0.4 Bar   |
| Focus       | Active   | Set Capillary        | 4500 V   | Set Dry Heater   | 200 °C    |
| Scan Begin  | 50 m/z   | Set End Plate Offset | -500 V   | Set Dry Gas      | 4.0 l/min |
| Scan End    | 1000 m/z | Set Charging Voltage | 2000 V   | Set Divert Valve | Source    |
|             |          | Set Corona           | 0 nA     | Set APCI Heater  | 0 °C      |

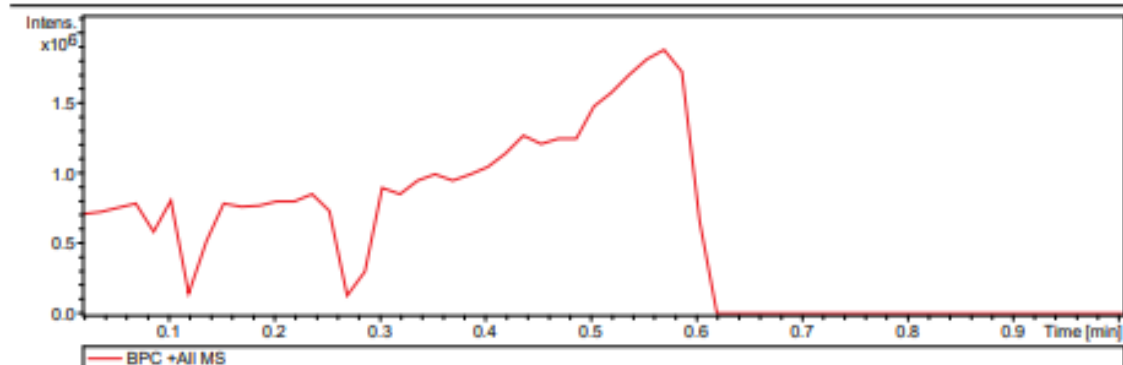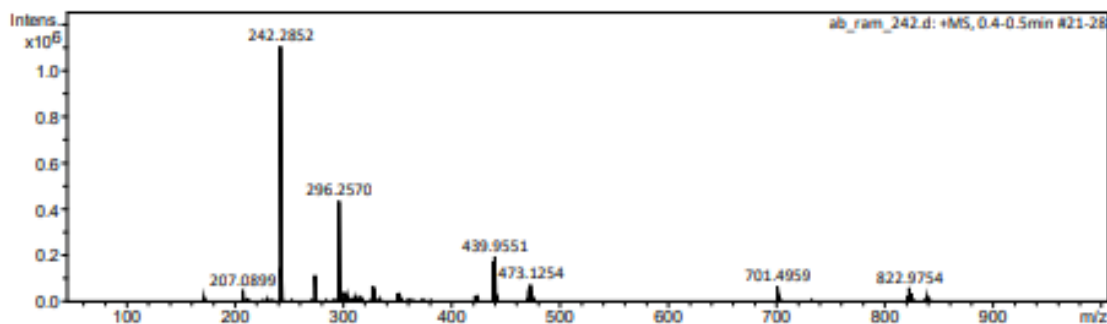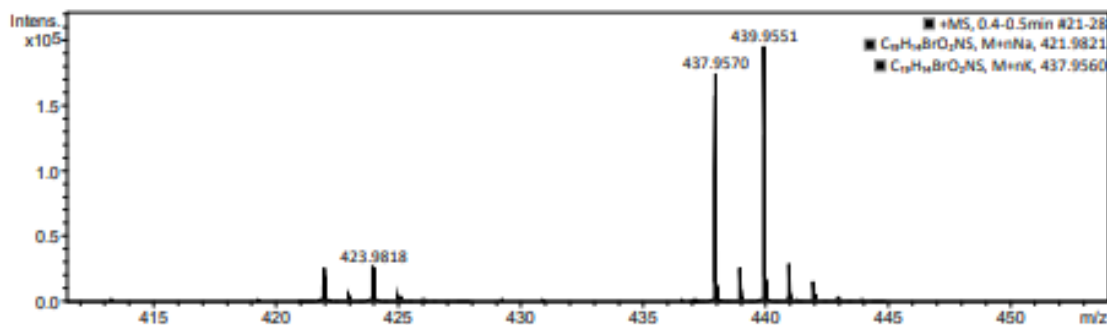

ab\_ram\_242.d

Bruker Compass DataAnalysis 4.1

printed: 7/22/2022 1:33:22 PM

by: IISER Kolkata

Page 1 of 1

HRMS data of 14a

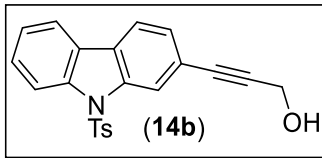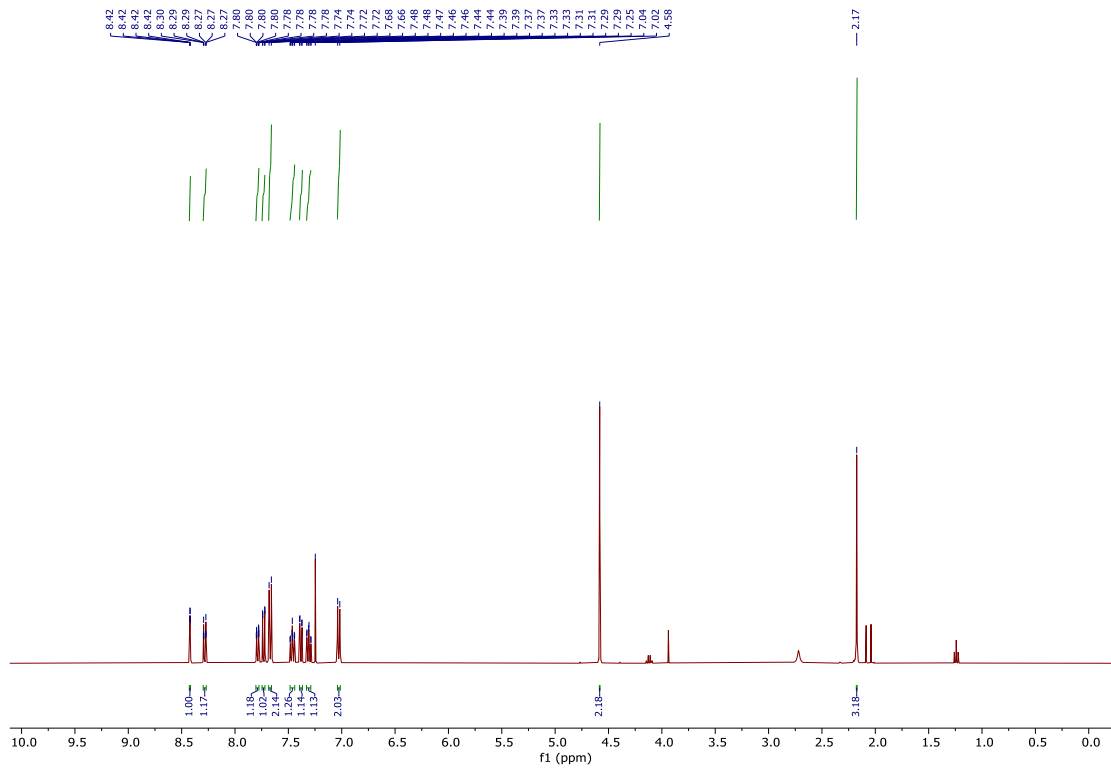

<sup>1</sup>H NMR (400 MHz, CDCl<sub>3</sub>) of 14b

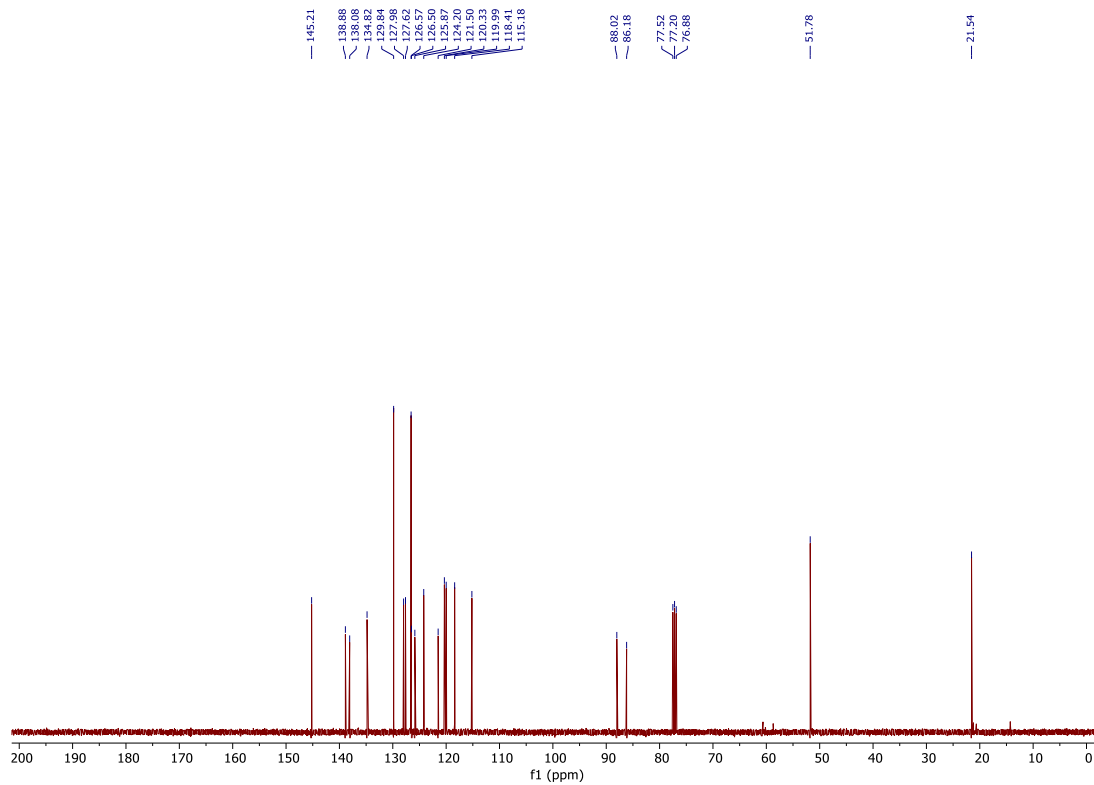

<sup>13</sup>C NMR (101 MHz, CDCl<sub>3</sub>) of 14b

# Display Report

## Analysis Info

Analysis Name D:\Data\User data\2022\JULY\ab\_ram\_184.d  
Method Tune\_pos\_Standard\_July2022.m  
Sample Name ab\_ram\_184  
Comment

Acquisition Date 7/26/2022 12:51:27 PM

Operator IISER Kolkata  
Instrument maXis impact 8282001.00127

## Acquisition Parameter

|             |          |                      |          |                  |           |
|-------------|----------|----------------------|----------|------------------|-----------|
| Source Type | ESI      | Ion Polarity         | Positive | Set Nebulizer    | 0.4 Bar   |
| Focus       | Active   | Set Capillary        | 4500 V   | Set Dry Heater   | 200 °C    |
| Scan Begin  | 50 m/z   | Set End Plate Offset | -500 V   | Set Dry Gas      | 4.0 l/min |
| Scan End    | 1000 m/z | Set Charging Voltage | 2000 V   | Set Divert Valve | Source    |
|             |          | Set Corona           | 0 nA     | Set APCI Heater  | 0 °C      |

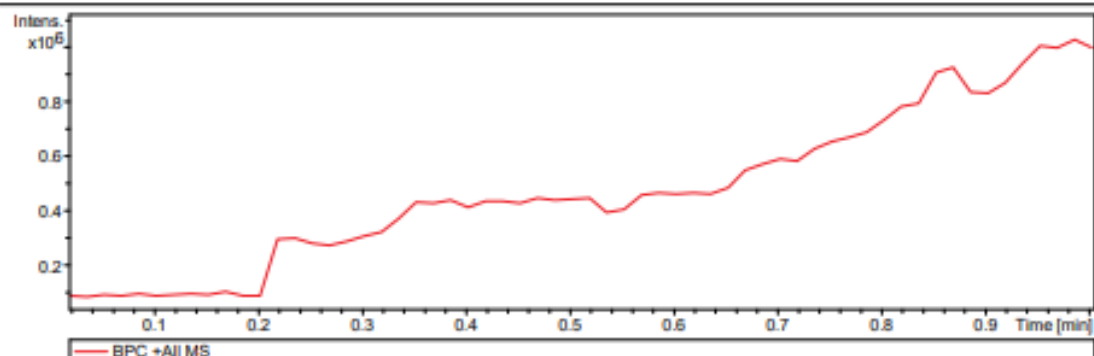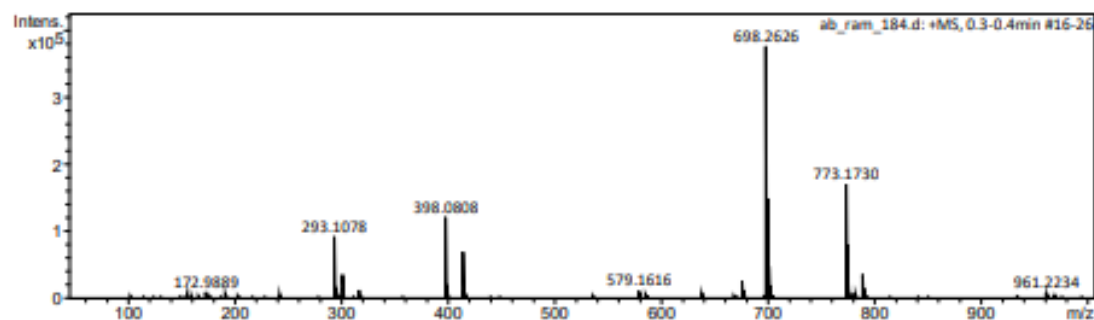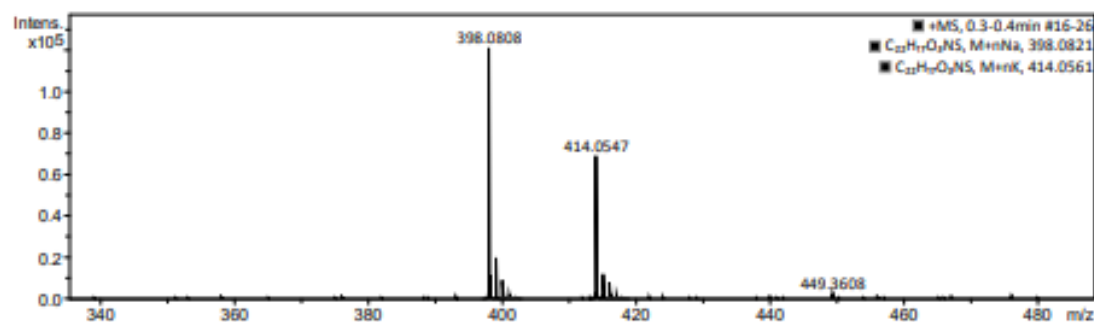

ab\_ram\_184.d

Bruker Compass DataAnalysis 4.1

printed: 7/26/2022 12:53:47 PM

by: IISER Kolkata

Page 1 of 1

HRMS data of 14b

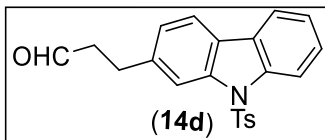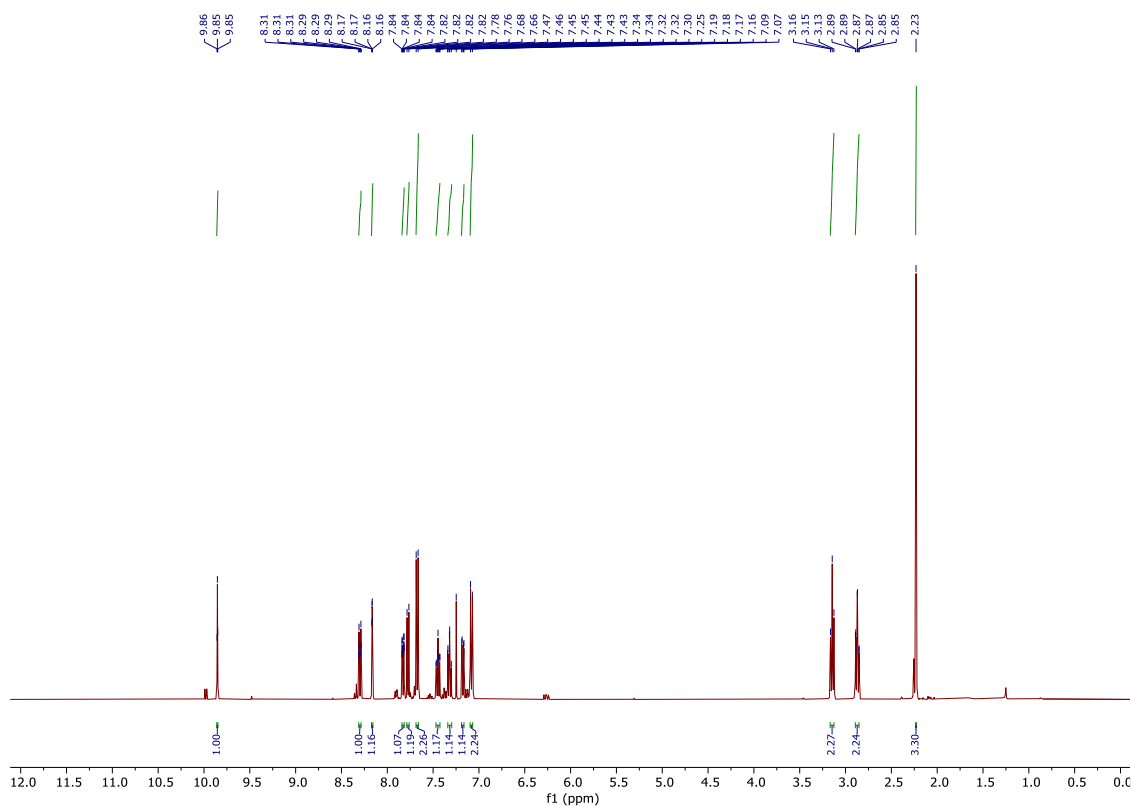

<sup>1</sup>H NMR (400 MHz, CDCl<sub>3</sub>) of **14d**

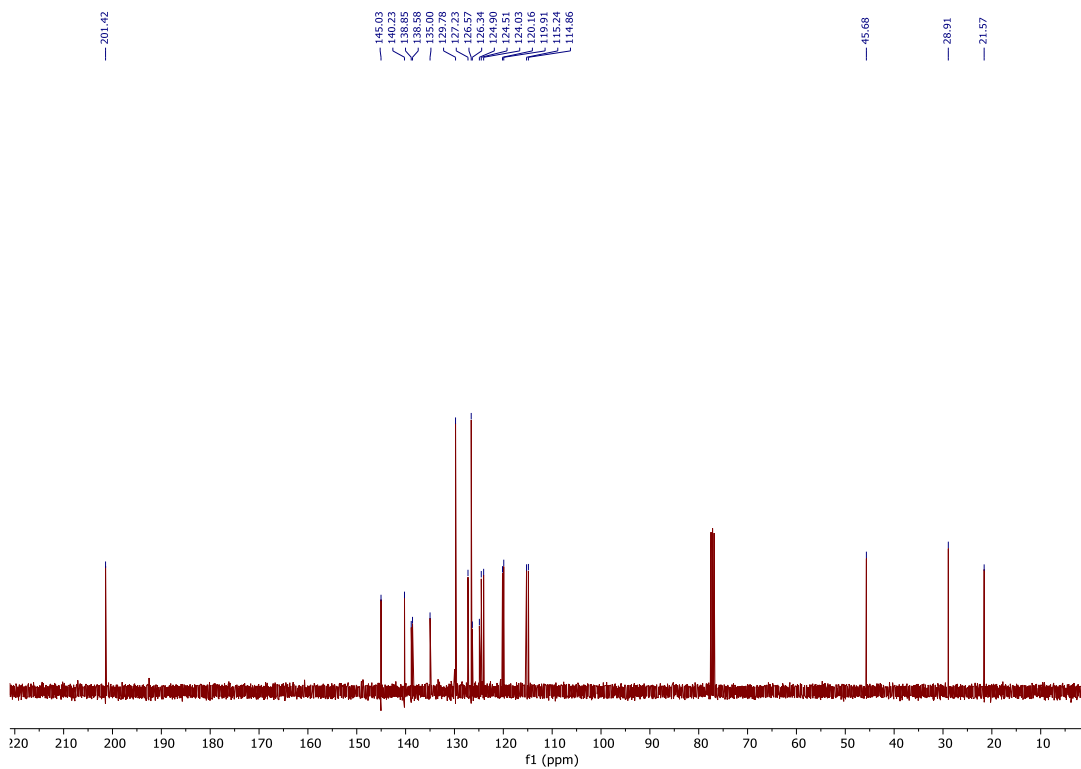

<sup>13</sup>C NMR (126 MHz, CDCl<sub>3</sub>) of **14d**

# Display Report

## Analysis Info

Analysis Name D:\Data\User data\2022\AUGUST\ab\_ram\_188.d  
Method Tune\_pos\_Standard\_July2022.m  
Sample Name ab\_ram\_188  
Comment

Acquisition Date 8/8/2022 12:16:45 PM  
Operator IISER Kolkata  
Instrument maXis impact 8282001.00127

## Acquisition Parameter

|             |          |                      |          |                  |           |
|-------------|----------|----------------------|----------|------------------|-----------|
| Source Type | ESI      | Ion Polarity         | Positive | Set Nebulzer     | 0.4 Bar   |
| Focus       | Active   | Set Capillary        | 4500 V   | Set Dry Heater   | 200 °C    |
| Scan Begin  | 50 m/z   | Set End Plate Offset | -500 V   | Set Dry Gas      | 4.0 l/min |
| Scan End    | 1000 m/z | Set Charging Voltage | 2000 V   | Set Divert Valve | Source    |
|             |          | Set Corona           | 0 nA     | Set APCI Heater  | 0 °C      |

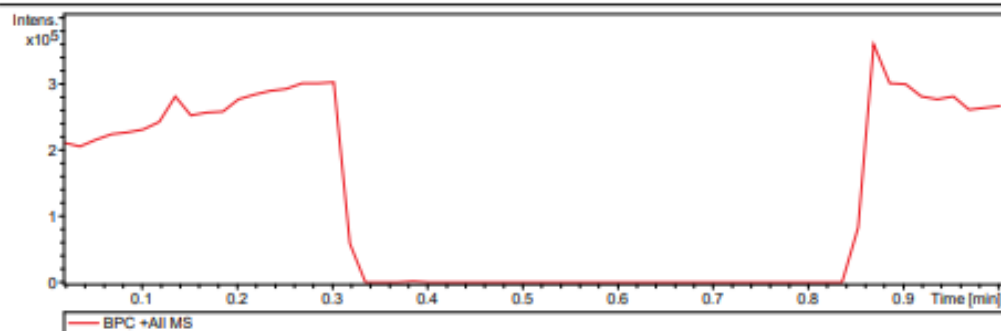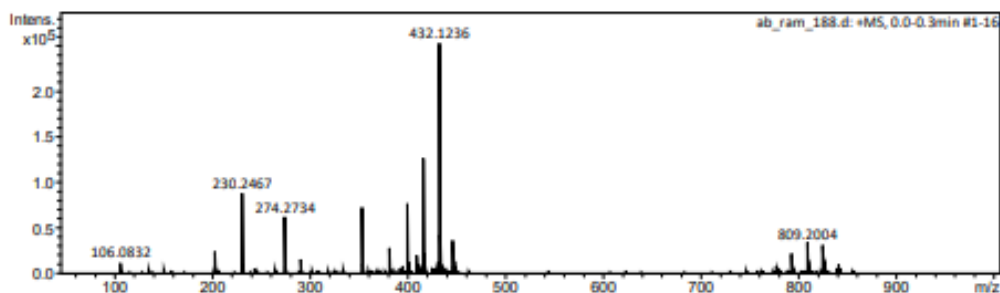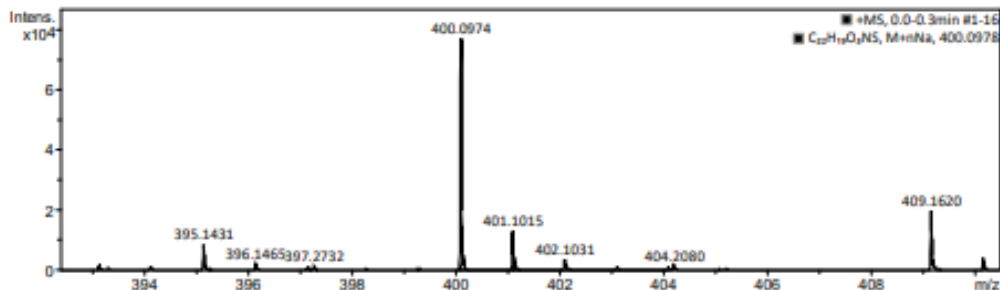

ab\_ram\_188.d

Bruker Compass DataAnalysis 4.1

printed: 8/8/2022 12:21:07 PM

by: IISER Kolkata

Page 1 of 1

HRMS data of **14d**

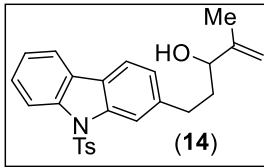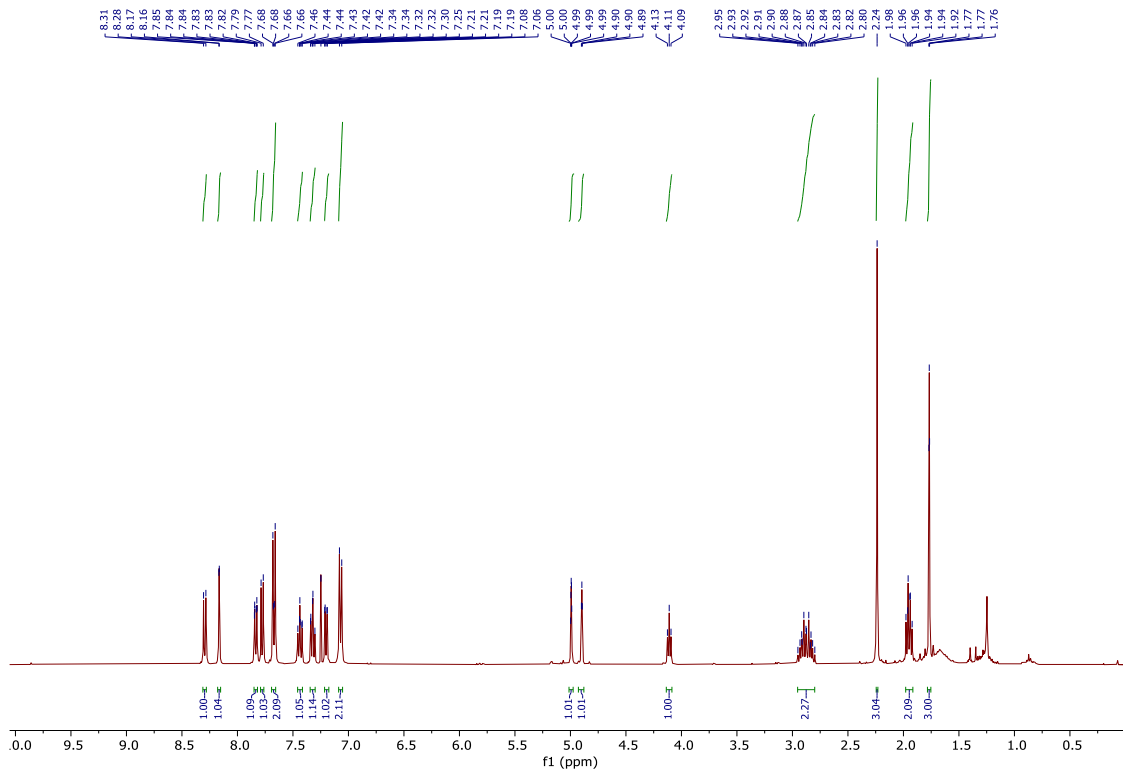

$^1\text{H NMR}$  (400MHz,  $\text{CDCl}_3$ ) of **14**

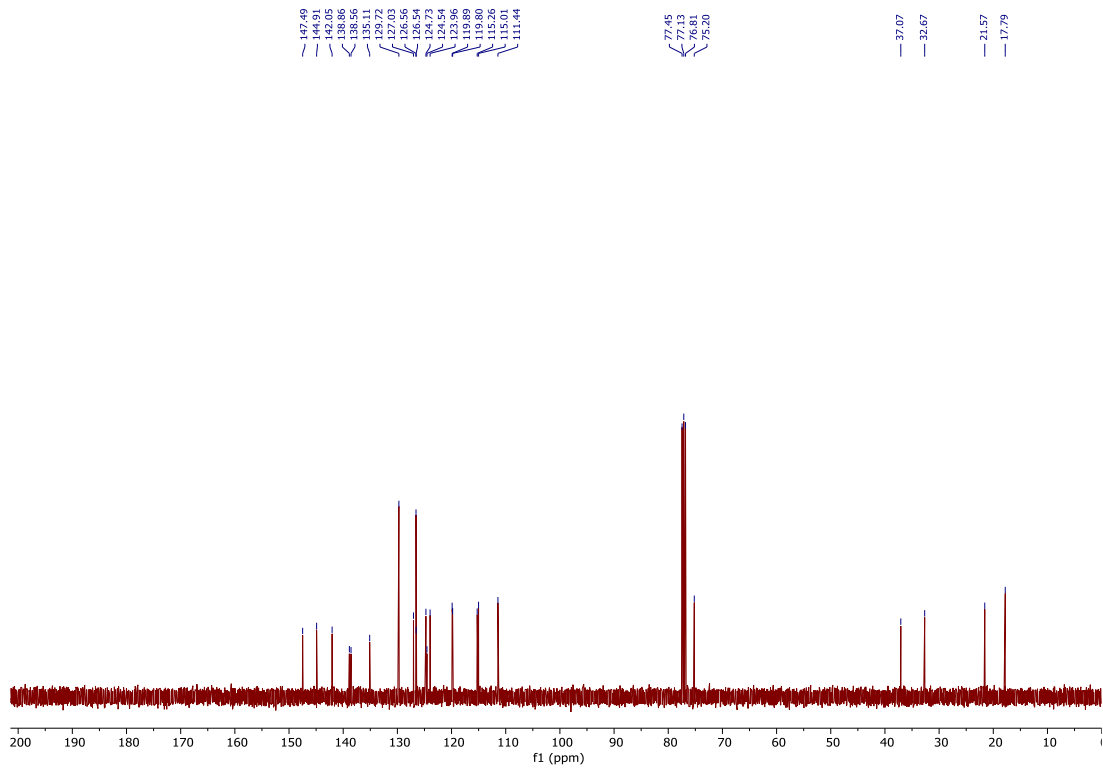

$^{13}\text{C NMR}$  (101 MHz,  $\text{CDCl}_3$ ) of **14**

# Display Report

## Analysis Info

Analysis Name D:\Data\User data\2022\SEPT\ab\_ram\_320\_1.d  
Method Tune\_pos\_Standard\_July2022.m  
Sample Name ab\_ram\_320\_1  
Comment

Acquisition Date 9/21/2022 10:23:22 AM  
Operator IISER Kolkata  
Instrument maXis impact 8282001.00127

## Acquisition Parameter

|             |          |                      |          |                  |           |
|-------------|----------|----------------------|----------|------------------|-----------|
| Source Type | ESI      | Ion Polarity         | Positive | Set Nebulizer    | 0.4 Bar   |
| Focus       | Active   | Set Capillary        | 4500 V   | Set Dry Heater   | 200 °C    |
| Scan Begin  | 50 m/z   | Set End Plate Offset | -500 V   | Set Dry Gas      | 4.0 l/min |
| Scan End    | 1000 m/z | Set Charging Voltage | 2000 V   | Set Divert Valve | Source    |
|             |          | Set Corona           | 0 nA     | Set APCI Heater  | 0 °C      |

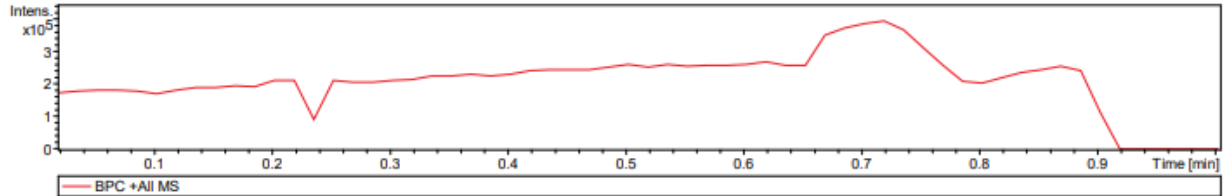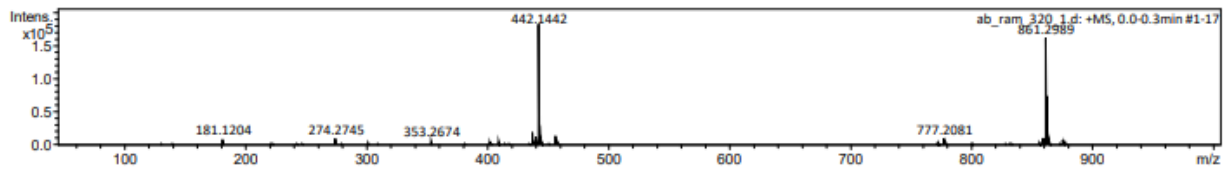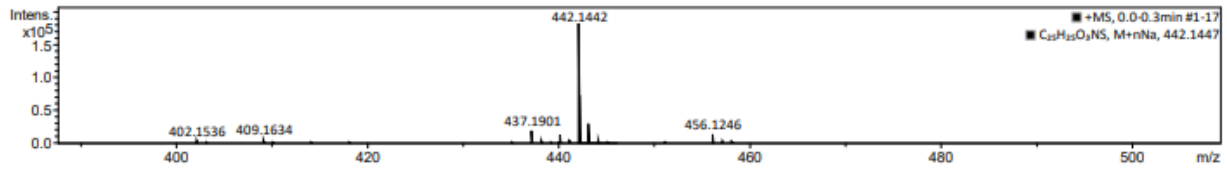

HRMS data of 14



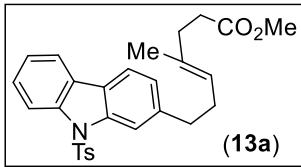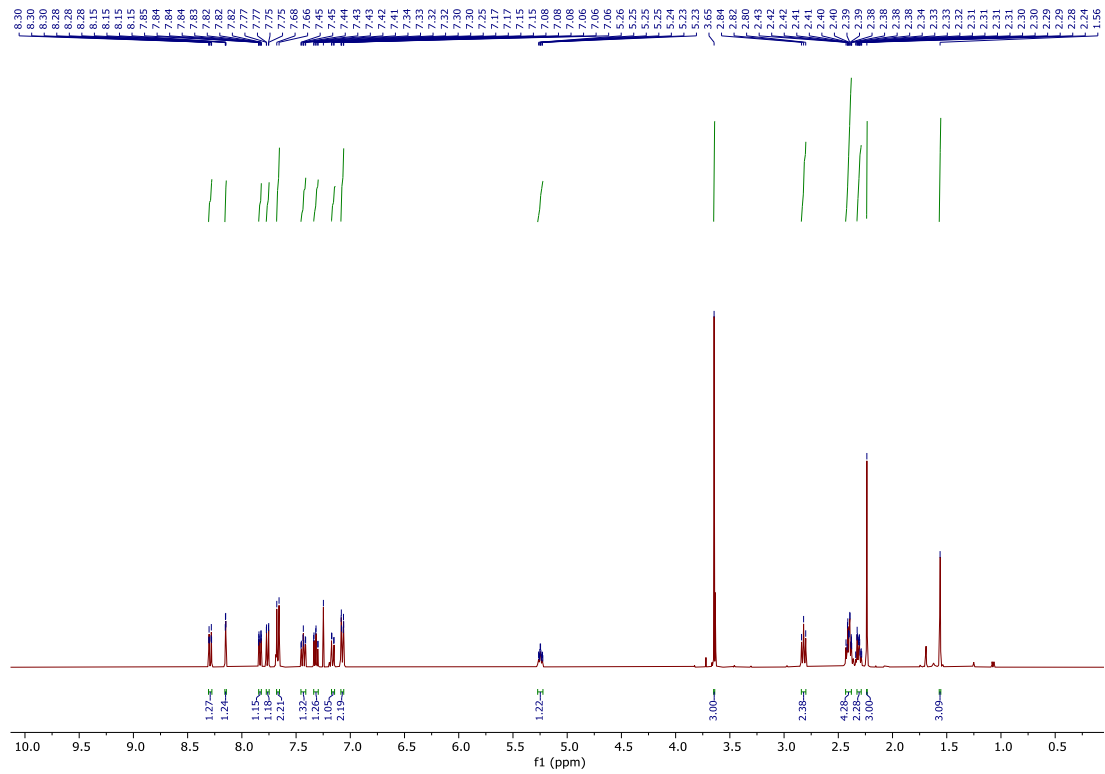

$^1\text{H}$  NMR (500 MHz,  $\text{CDCl}_3$ ) of **13a**

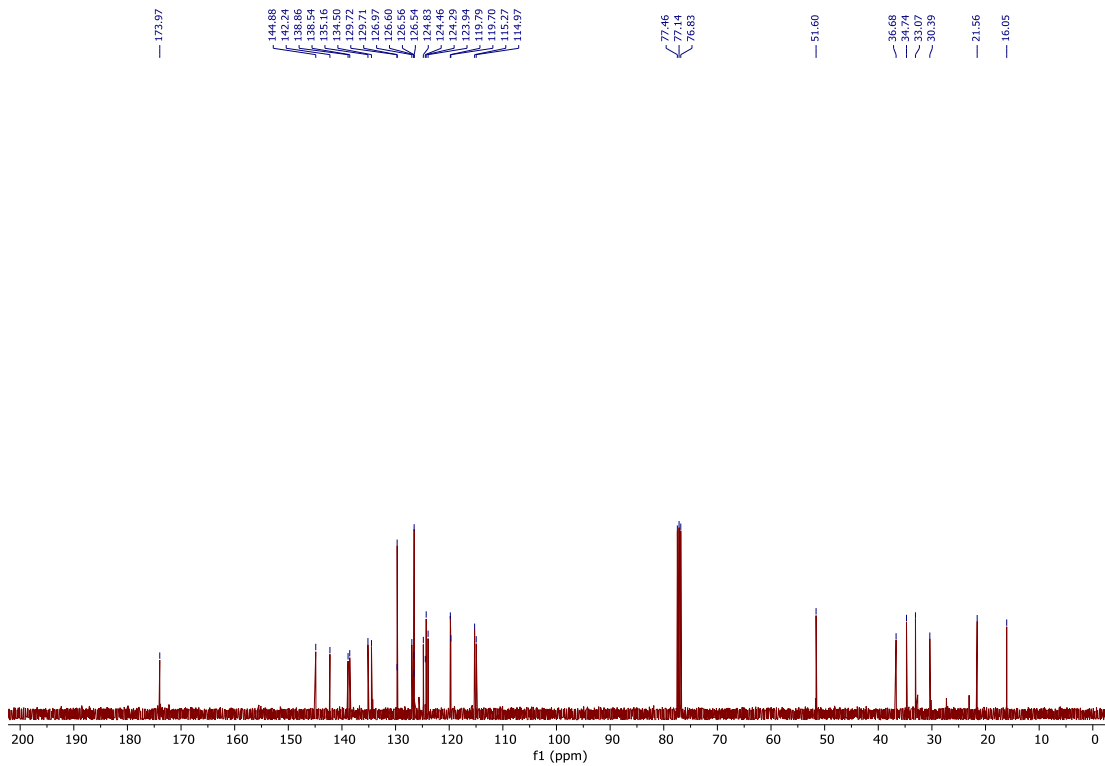

$^{13}\text{C}$  NMR (101 MHz,  $\text{CDCl}_3$ ) of **13a**

# Display Report

## Analysis Info

Analysis Name D:\Data\User data\2022\AUGUST\AB\_RAM\_176.d  
Method Tune\_pos\_Standard\_July2022.m  
Sample Name AB\_RAM\_176  
Comment

Acquisition Date 8/25/2022 1:06:32 PM

Operator IISER Kolkata  
Instrument maXis impact 8282001.00127

## Acquisition Parameter

|             |          |                      |          |                  |           |
|-------------|----------|----------------------|----------|------------------|-----------|
| Source Type | ESI      | Ion Polarity         | Positive | Set Nebulizer    | 0.4 Bar   |
| Focus       | Active   | Set Capillary        | 4500 V   | Set Dry Heater   | 200 °C    |
| Scan Begin  | 50 m/z   | Set End Plate Offset | -500 V   | Set Dry Gas      | 4.0 l/min |
| Scan End    | 1000 m/z | Set Charging Voltage | 2000 V   | Set Divert Valve | Source    |
|             |          | Set Corona           | 0 nA     | Set APCI Heater  | 0 °C      |

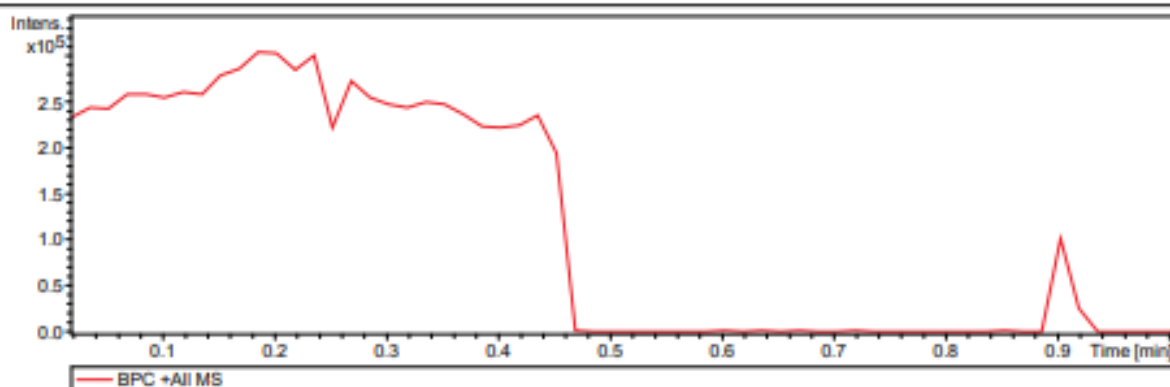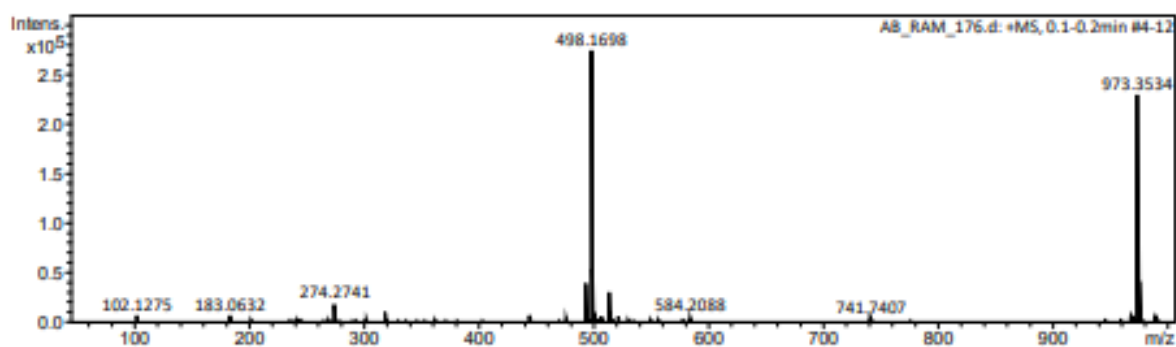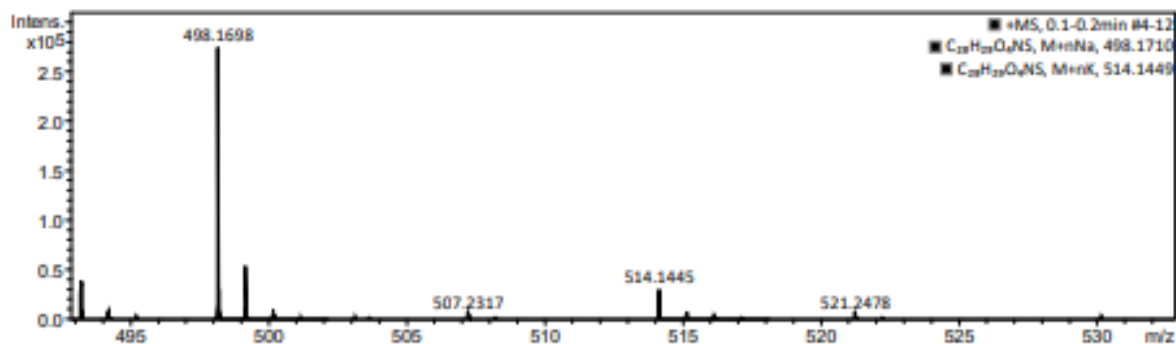

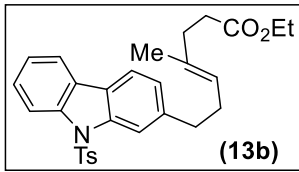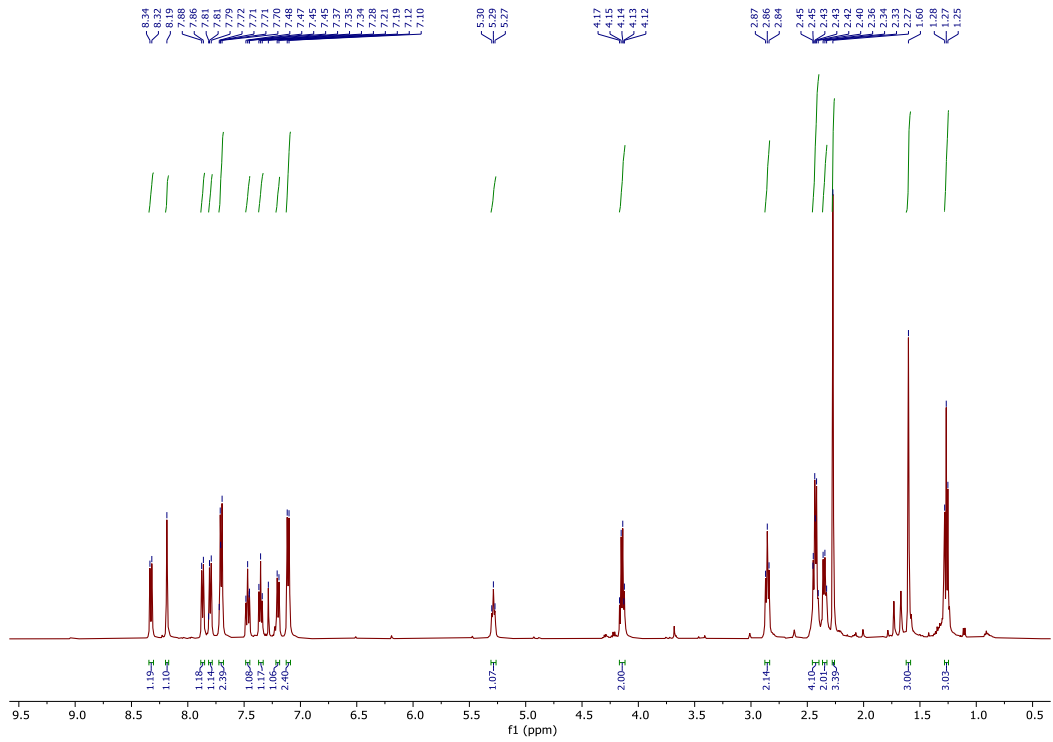

<sup>1</sup>H NMR (500 MHz, CDCl<sub>3</sub>) of compound **13b**

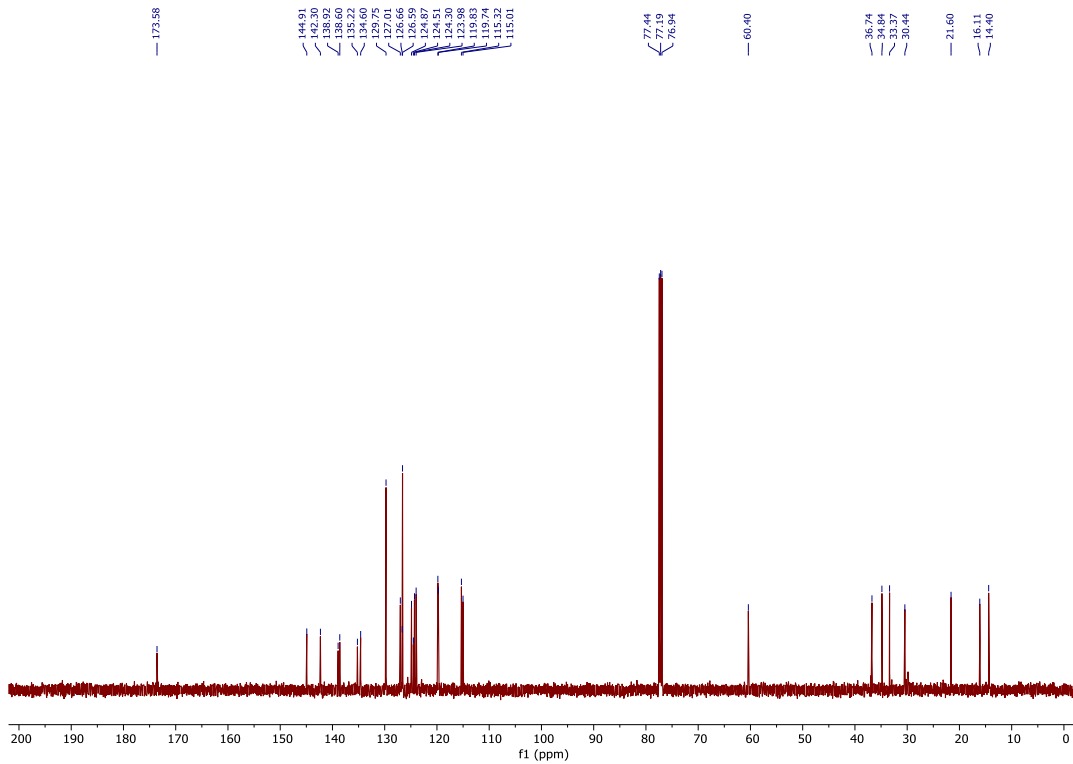

<sup>13</sup>C NMR (125 MHz, CDCl<sub>3</sub>) of compound **13b**

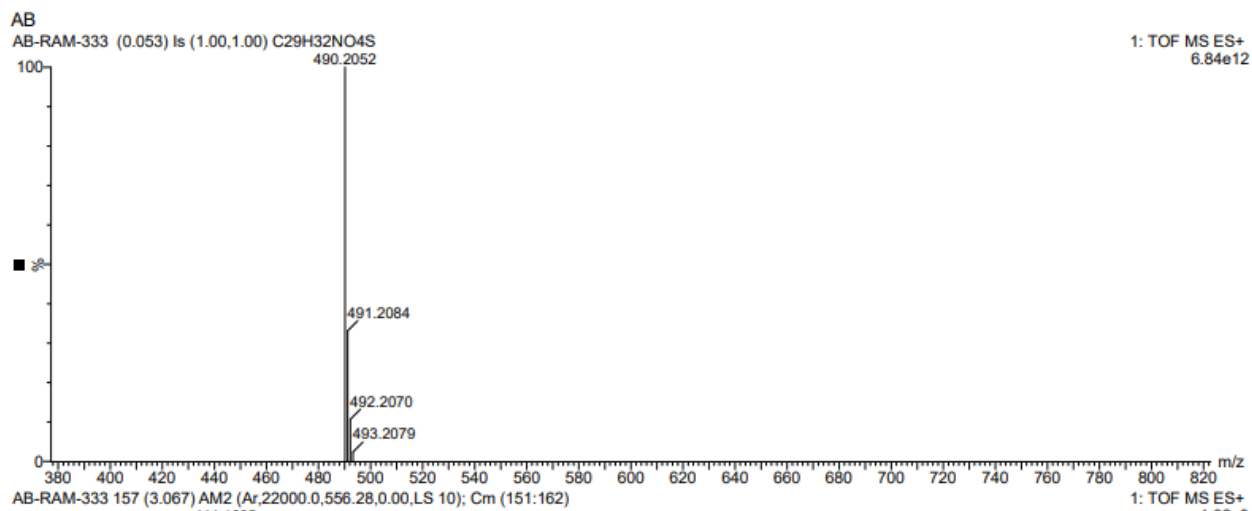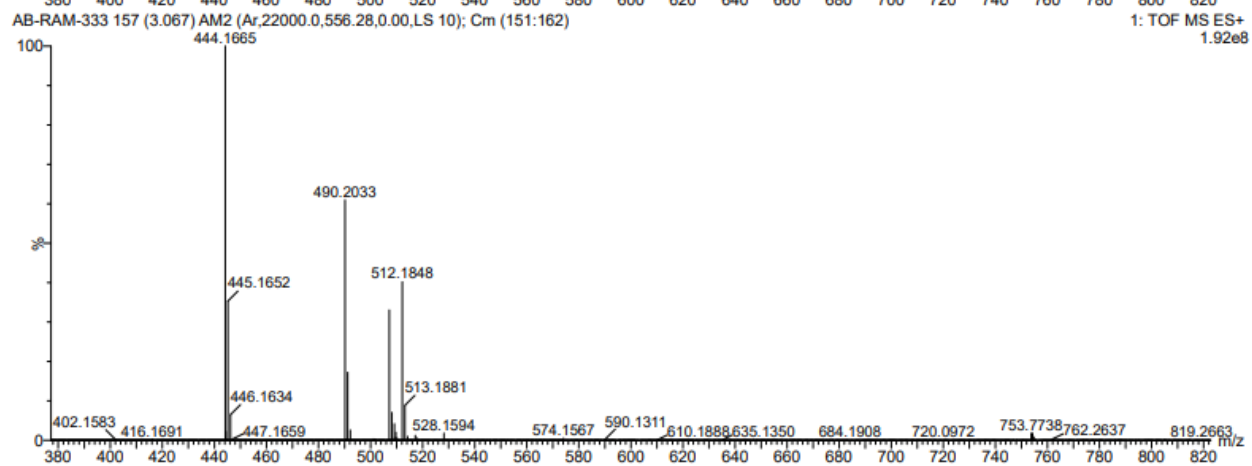

HRMS data of **13b**

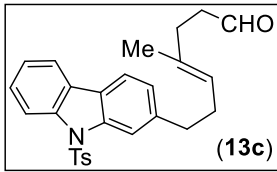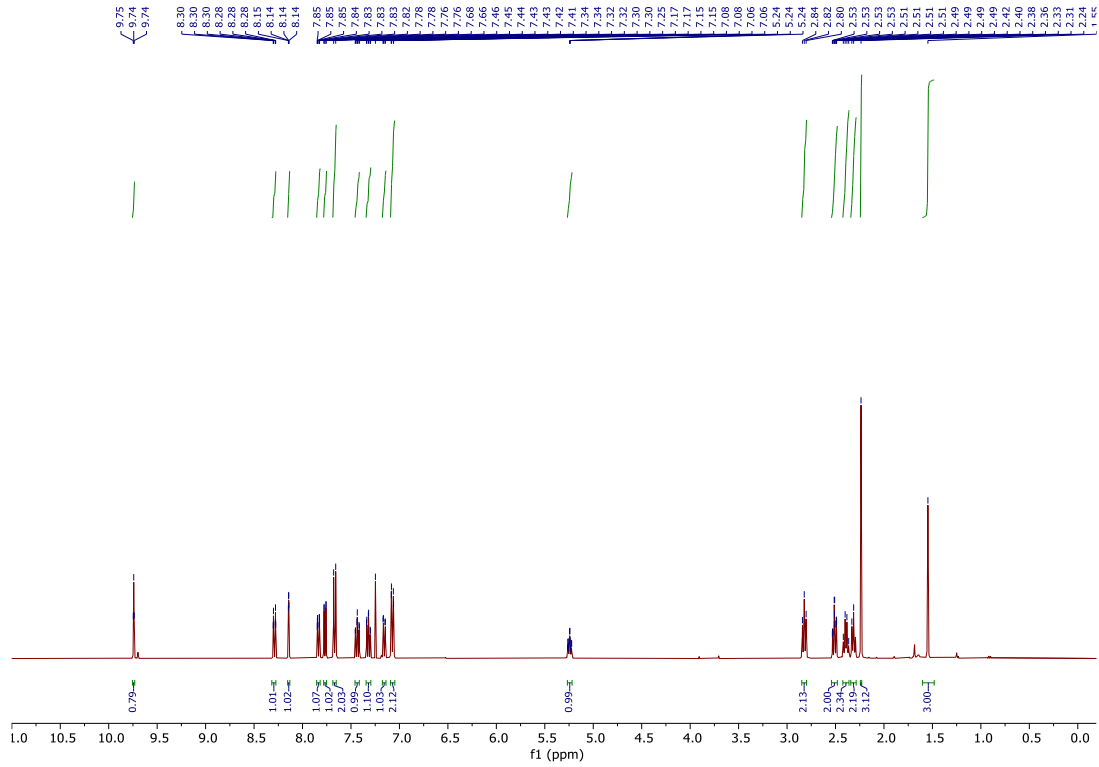

**<sup>1</sup>H NMR (400 MHz, CDCl<sub>3</sub>) of 13c**

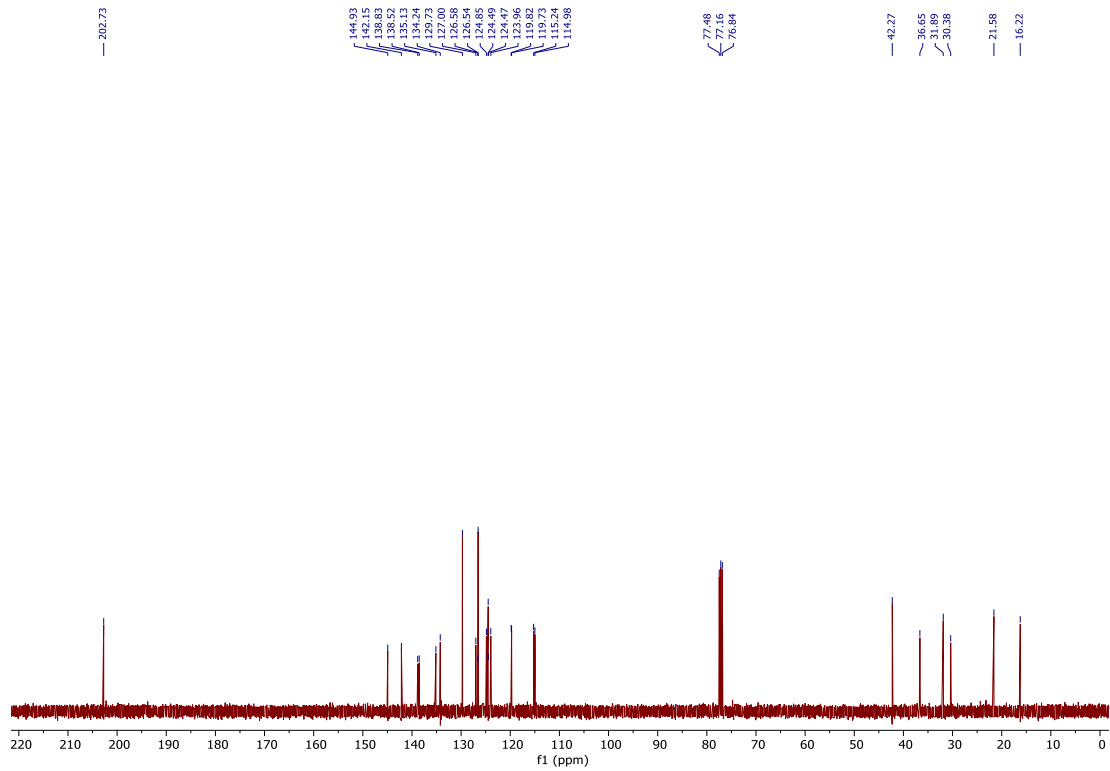

**<sup>13</sup>C NMR (126 MHz, CDCl<sub>3</sub>) of 13c**

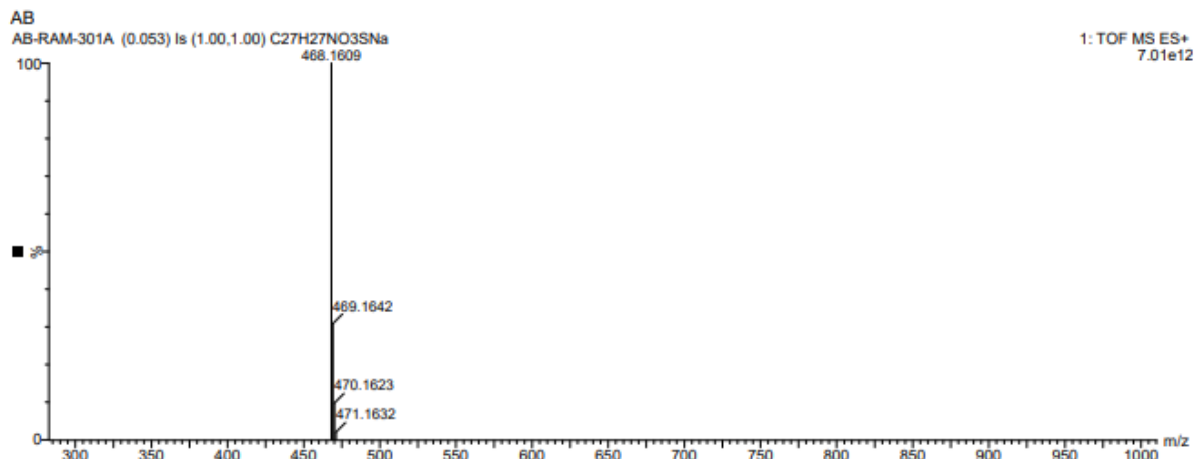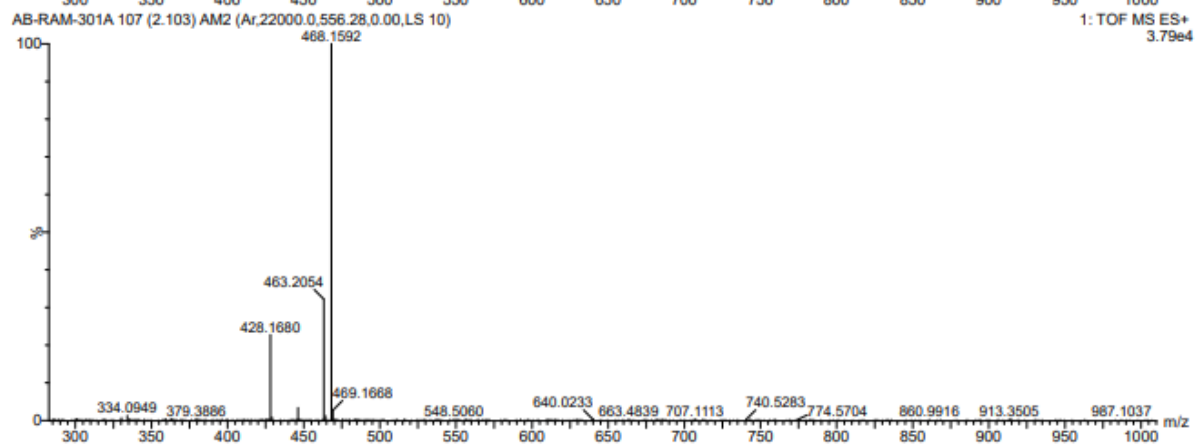

HRMS data of **13c**

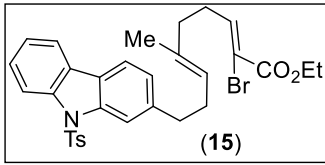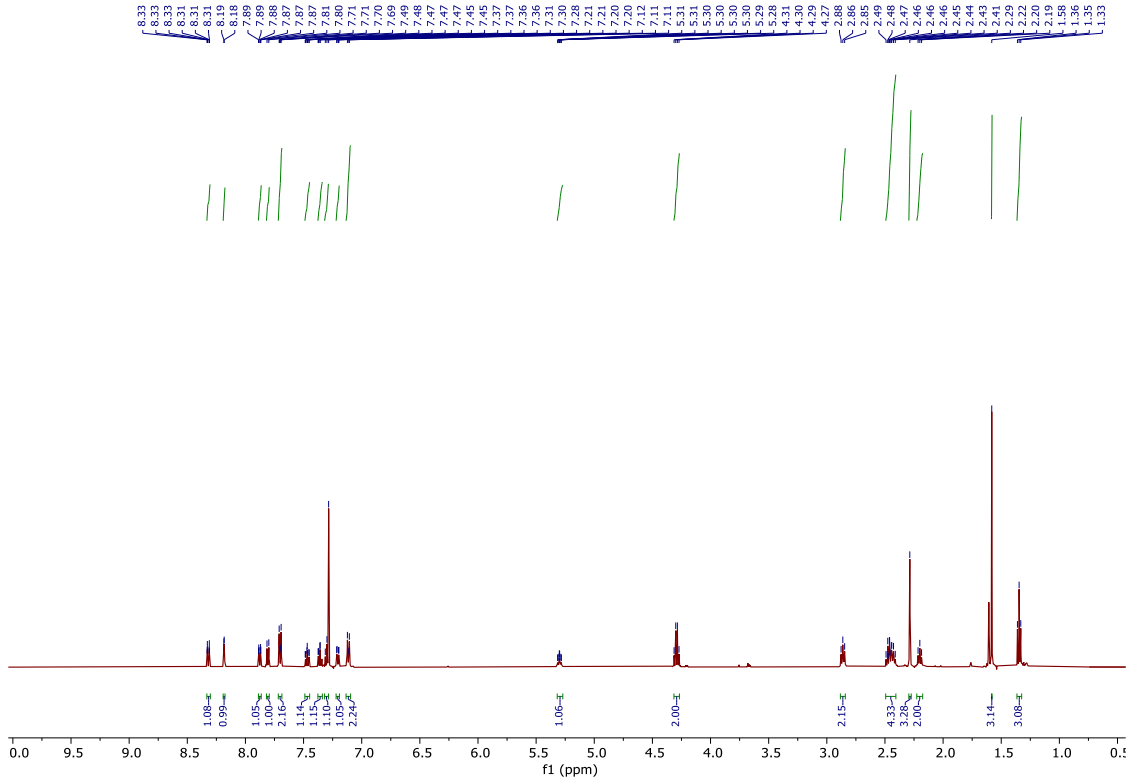

$^1\text{H NMR}$  (500 MHz,  $\text{CDCl}_3$ ) of 15

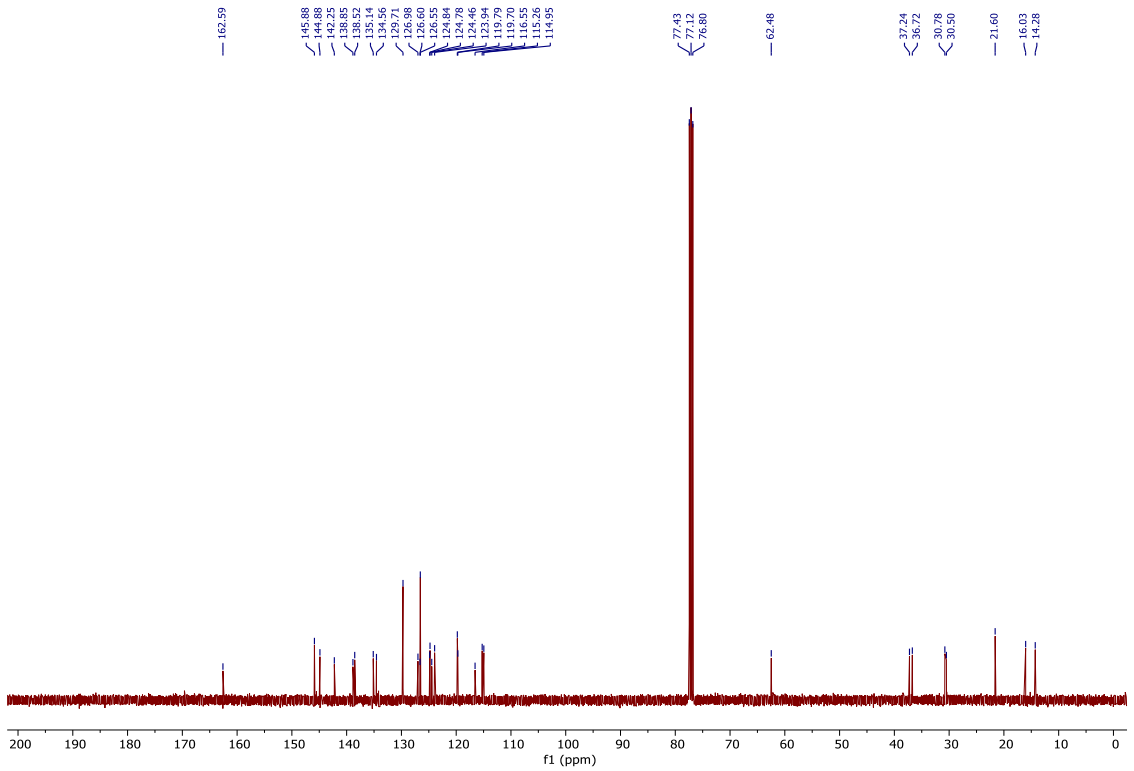

$^{13}\text{C NMR}$  (101 MHz,  $\text{CDCl}_3$ ) of 15

# Display Report

## Analysis Info

Analysis Name D:\Data\User data\2022\JUNE\AB\_RAM\_303.d  
Method Tune\_pos\_Standard.m  
Sample Name AB\_RAM\_303  
Comment

Acquisition Date 6/20/2022 12:59:34 PM

Operator IISER Kolkata  
Instrument maXis impact 8282001.00127

## Acquisition Parameter

|             |          |                      |          |                  |           |
|-------------|----------|----------------------|----------|------------------|-----------|
| Source Type | ESI      | Ion Polarity         | Positive | Set Nebulizer    | 0.5 Bar   |
| Focus       | Active   | Set Capillary        | 3400 V   | Set Dry Heater   | 200 °C    |
| Scan Begin  | 50 m/z   | Set End Plate Offset | -500 V   | Set Dry Gas      | 4.0 l/min |
| Scan End    | 1000 m/z | Set Charging Voltage | 2000 V   | Set Divert Valve | Source    |
|             |          | Set Corona           | 0 nA     | Set APCI Heater  | 0 °C      |

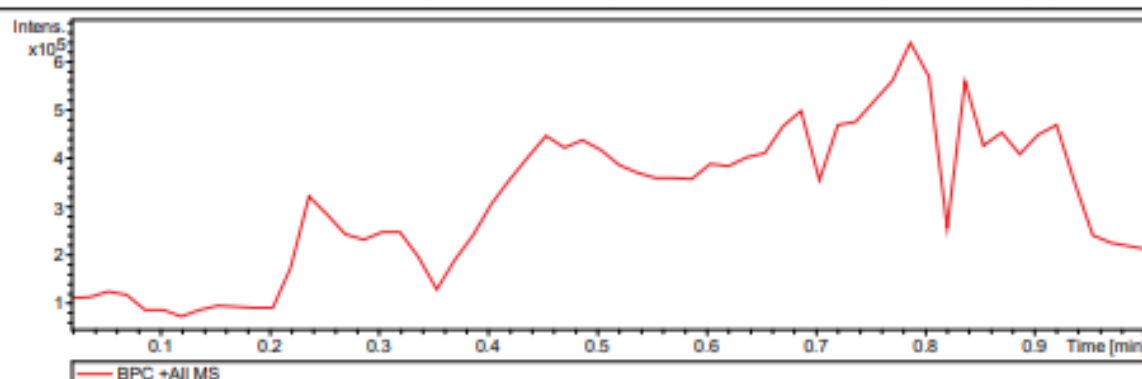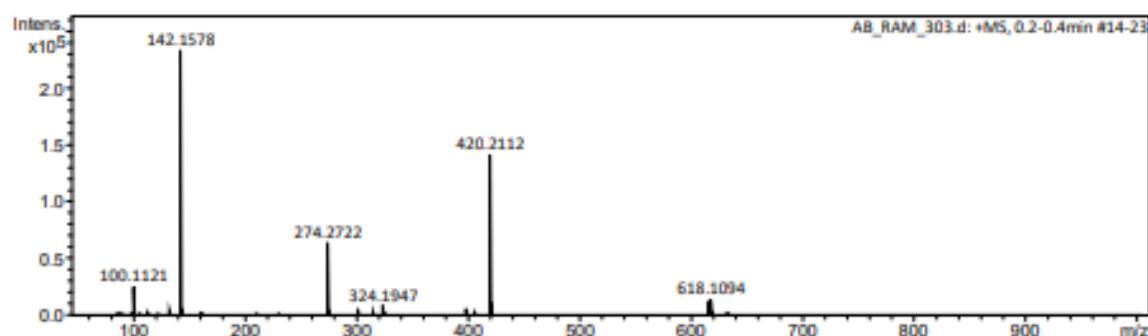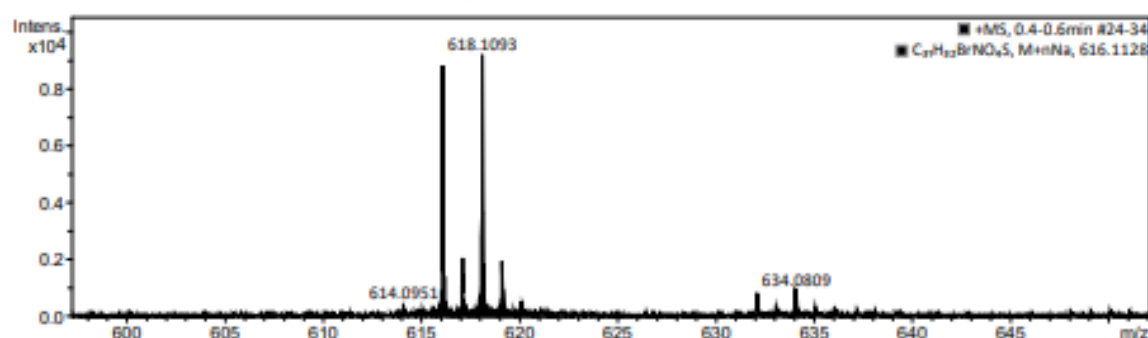

AB\_RAM\_303.d

Bruker Compass DataAnalysis 4.1

printed: 6/21/2022 4:25:43 PM

by: IISER Kolkata

Page 1 of 1

HRMS data of 15



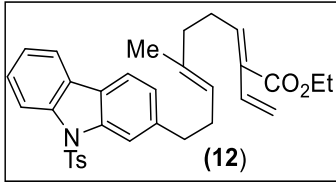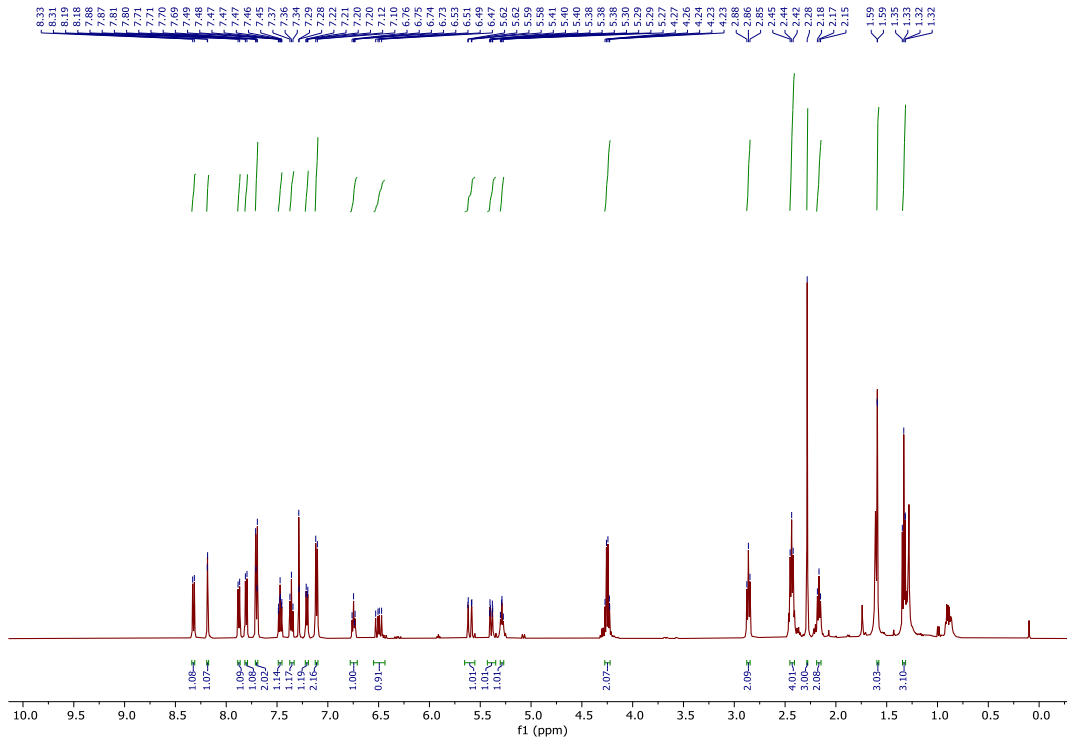

$^1\text{H}$  NMR (500 MHz,  $\text{CDCl}_3$ ) of **12**

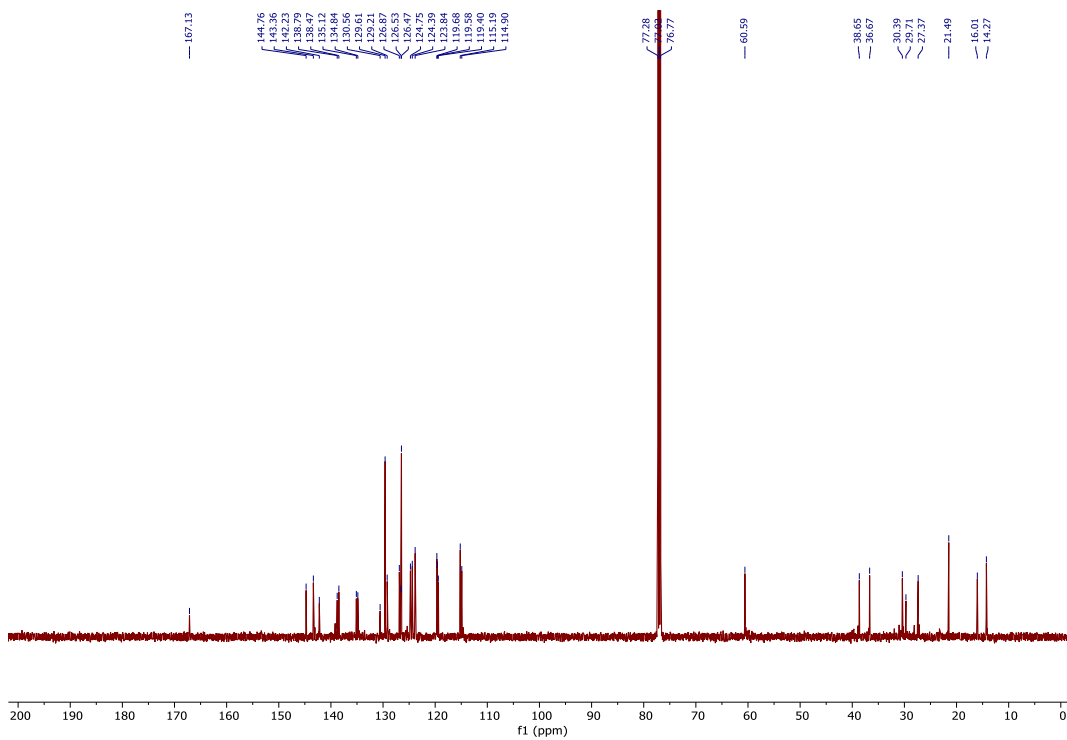

$^{13}\text{C}$  NMR (126 MHz,  $\text{CDCl}_3$ ) of **12**

# Display Report

## Analysis Info

Analysis Name D:\Data\User data\2022\JUNE\AB\_RAM\_304.d  
Method Tune\_pos\_Standard.m  
Sample Name AB\_RAM\_304  
Comment

Acquisition Date 6/20/2022 1:17:01 PM

Operator IISER Kolkata  
Instrument maXis impact 8282001.00127

## Acquisition Parameter

|             |          |                      |          |                  |           |
|-------------|----------|----------------------|----------|------------------|-----------|
| Source Type | ESI      | Ion Polarity         | Positive | Set Nebulizer    | 0.5 Bar   |
| Focus       | Active   | Set Capillary        | 3400 V   | Set Dry Heater   | 200 °C    |
| Scan Begin  | 50 m/z   | Set End Plate Offset | -500 V   | Set Dry Gas      | 4.0 l/min |
| Scan End    | 1000 m/z | Set Charging Voltage | 2000 V   | Set Divert Valve | Source    |
|             |          | Set Corona           | 0 nA     | Set APCI Heater  | 0 °C      |

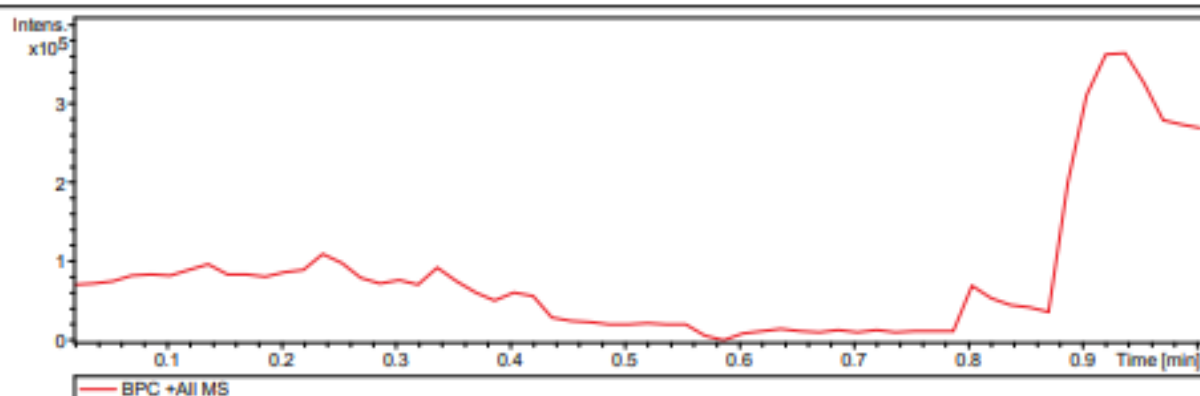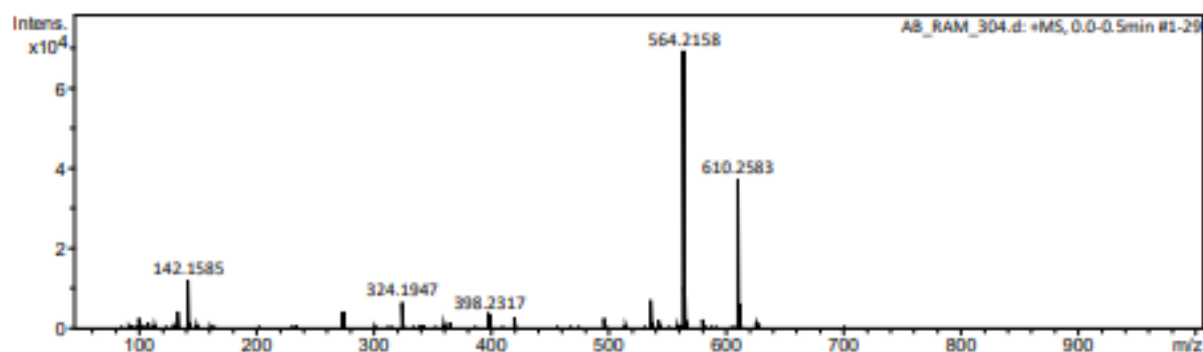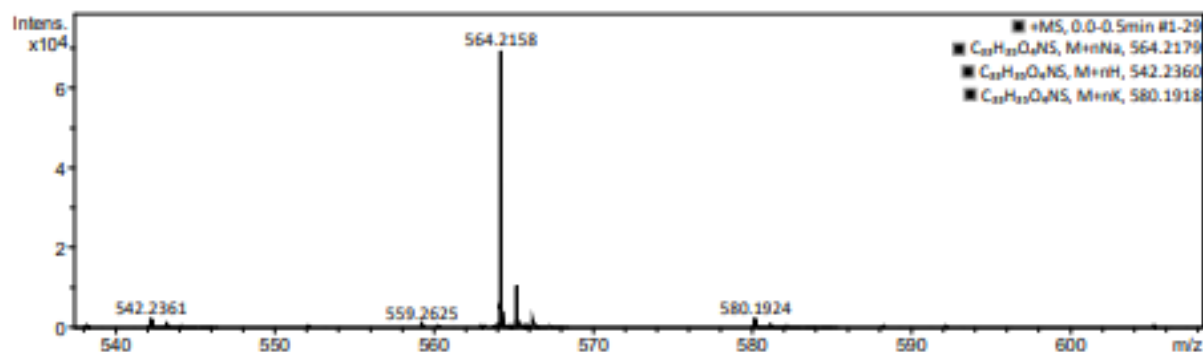

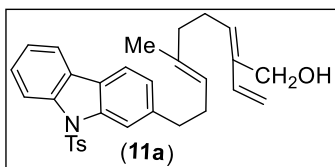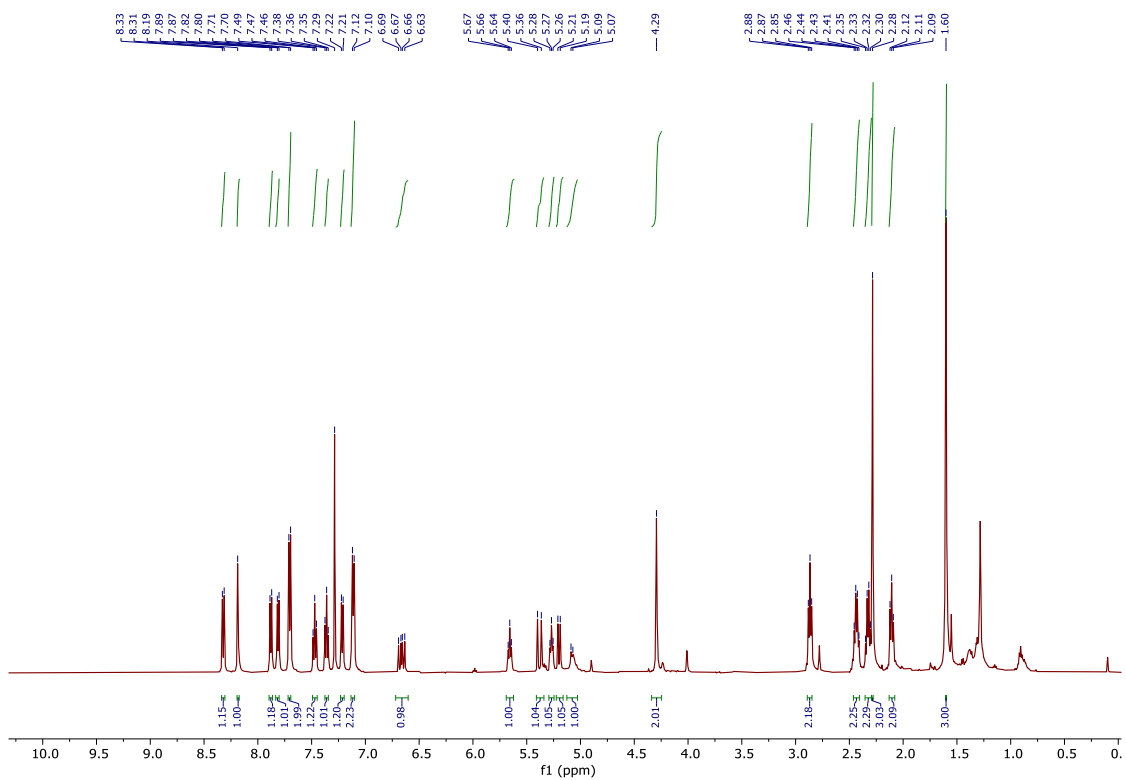

<sup>1</sup>H NMR (500 MHz, CDCl<sub>3</sub>) of **11a**

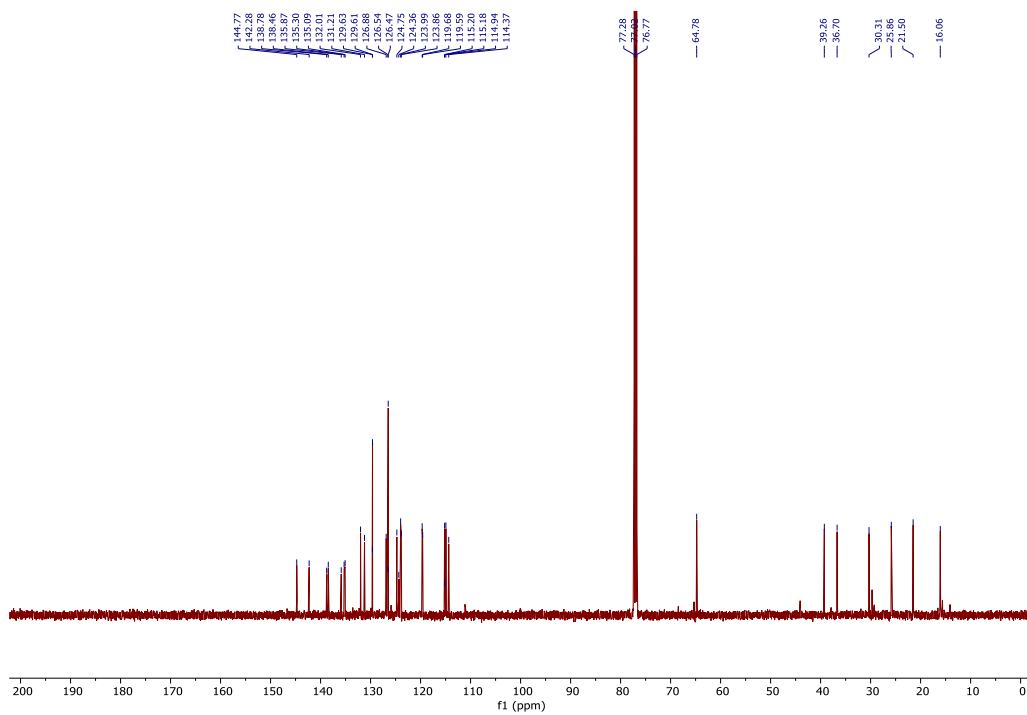

<sup>13</sup>C NMR (126 MHz, CDCl<sub>3</sub>) of **11a**

## Display Report

### Analysis Info

Analysis Name D:\Data\User data\2022\AUGUST\ab\_ram\_309.d  
Method Tune\_pos\_Standard\_July2022.m  
Sample Name ab\_ram\_309  
Comment

Acquisition Date 8/22/2022 11:36:12 AM

Operator IISER Kolkata  
Instrument maXis impact 8282001.00127

### Acquisition Parameter

|             |          |                      |          |                  |           |
|-------------|----------|----------------------|----------|------------------|-----------|
| Source Type | ESI      | Ion Polarity         | Positive | Set Nebulizer    | 0.4 Bar   |
| Focus       | Active   | Set Capillary        | 4500 V   | Set Dry Heater   | 200 °C    |
| Scan Begin  | 50 m/z   | Set End Plate Offset | -500 V   | Set Dry Gas      | 4.0 l/min |
| Scan End    | 1000 m/z | Set Charging Voltage | 2000 V   | Set Divert Valve | Source    |
|             |          | Set Corona           | 0 nA     | Set APCI Heater  | 0 °C      |

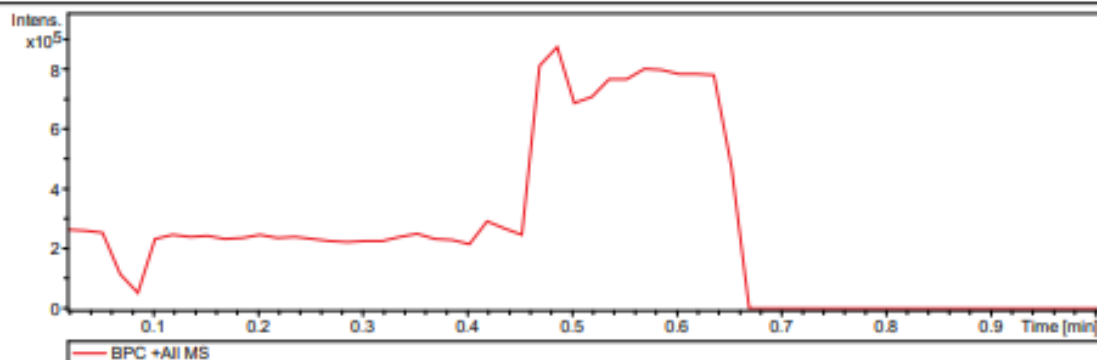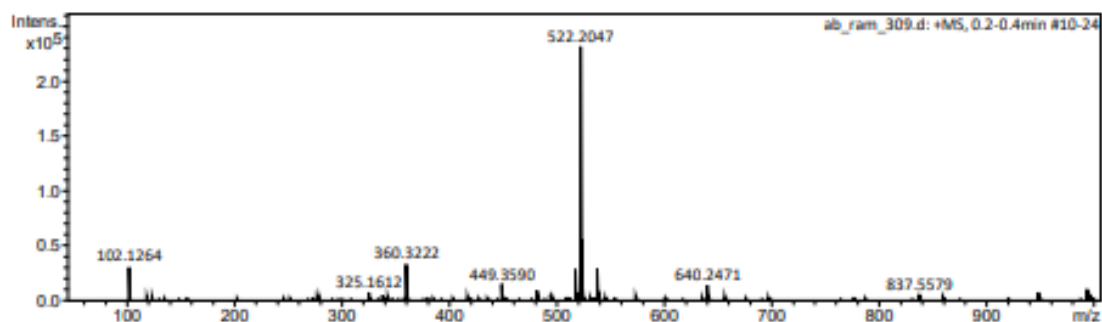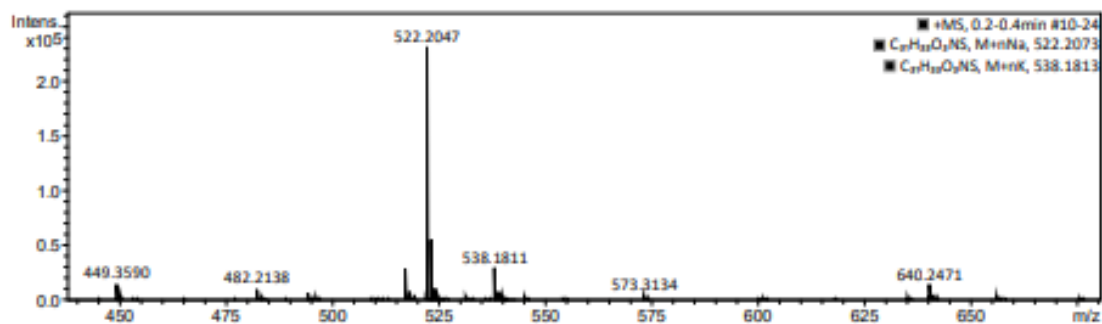

HRMS data of **11a**

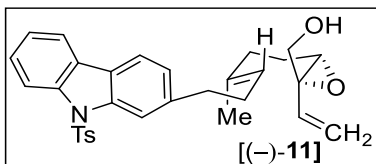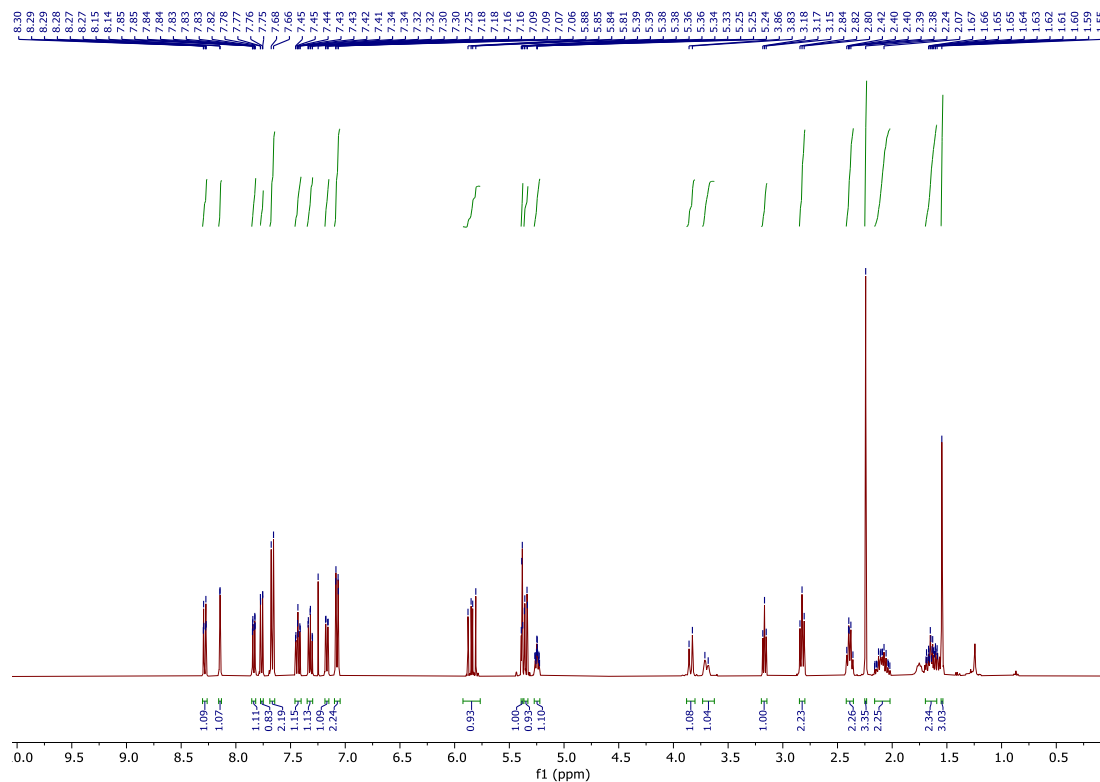

$^1\text{H}$  NMR (400 MHz,  $\text{CDCl}_3$ ) of compound : **[(-)-11]**

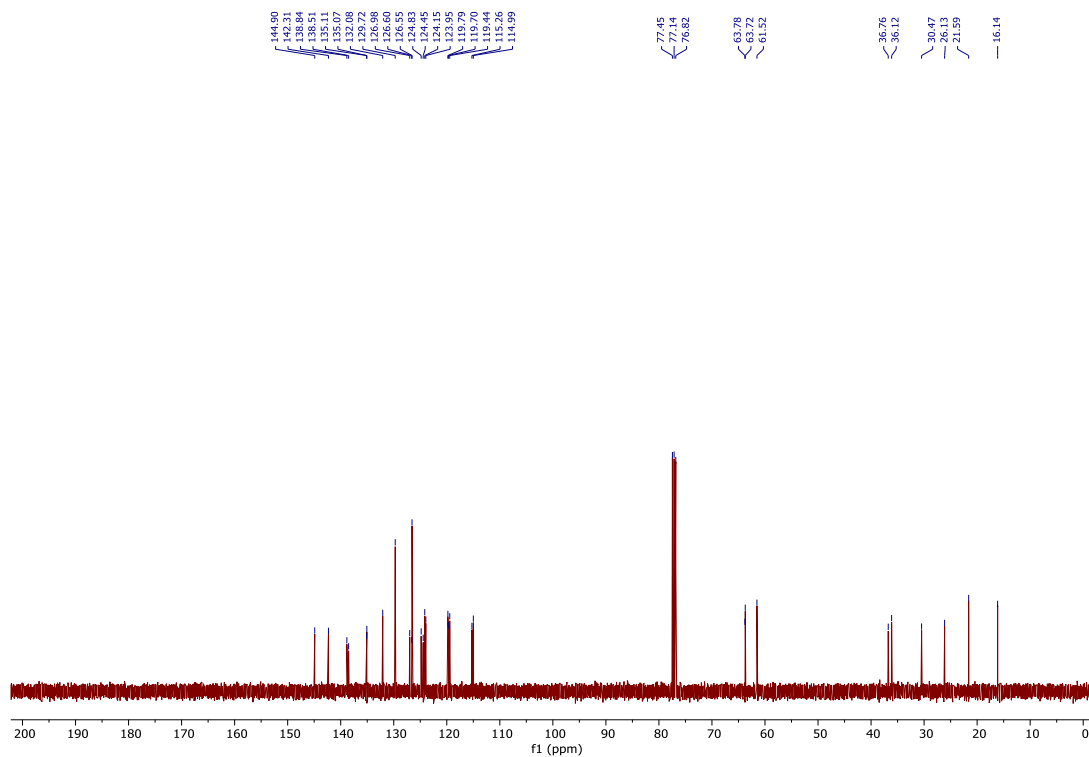

$^{13}\text{C}$  NMR (101 MHz,  $\text{CDCl}_3$ ) of compound : **[(-)-11]**

## Display Report

**Analysis Info**  
Analysis Name: D:\Data\User data\2022\NOV\ab\_ram\_310e.d  
Method: Tune\_pos\_Standard\_July2022.m  
Sample Name: ab\_ram\_310e  
Comment:  
Acquisition Date: 11/7/2022 11:38:22 AM  
Operator: IISER Kolkata  
Instrument: maXis impact  
8282001.00127

**Acquisition Parameter**

|             |          |                      |          |                  |           |
|-------------|----------|----------------------|----------|------------------|-----------|
| Source Type | ESI      | Ion Polarity         | Positive | Set Nebulizer    | 0.4 Bar   |
| Focus       | Active   | Set Capillary        | 4500 V   | Set Dry Heater   | 200 °C    |
| Scan Begin  | 50 m/z   | Set End Plate Offset | -500 V   | Set Dry Gas      | 4.0 l/min |
| Scan End    | 1000 m/z | Set Charging Voltage | 2000 V   | Set Divert Valve | Source    |
|             |          | Set Corona           | 0 nA     | Set APCI Heater  | 0 °C      |

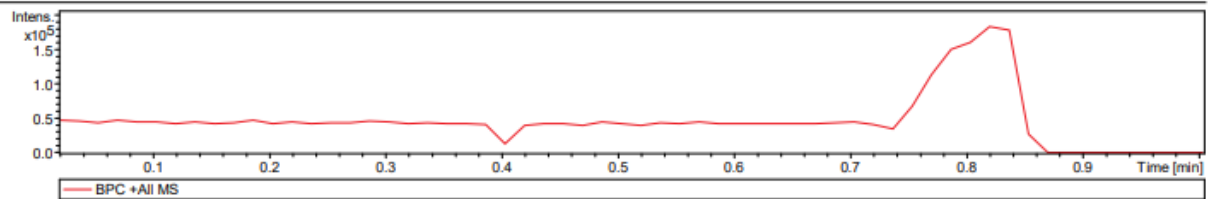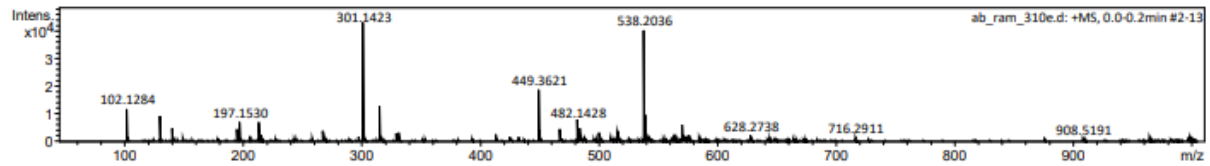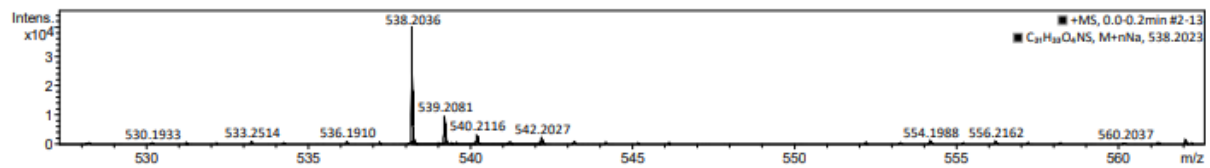

HRMS data of : [(-)-11]

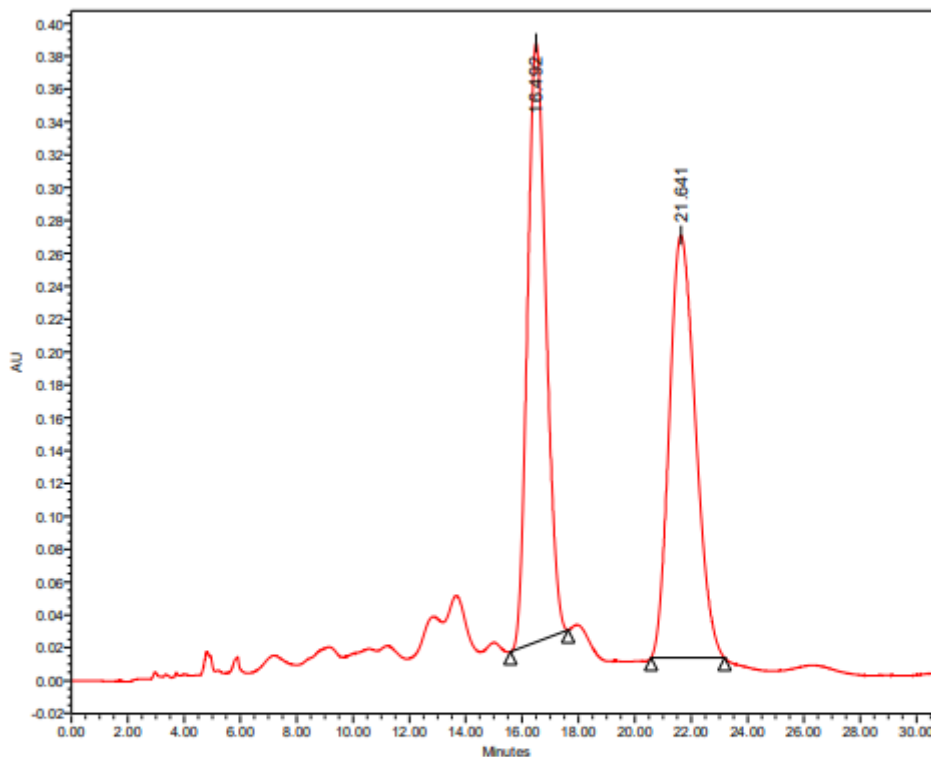

Sample Name: AB\_RAM\_310\_AS-H\_15\_01\_RAC; Date Acquired: 10-03-2023 15:27:22 IST; Vial: 1  
Injection: 1

**Peak Summary with Statistics**

Name:

|           | Sample Name               | Vial | Inj | Retention Time (min) | Area     | % Area | Height |
|-----------|---------------------------|------|-----|----------------------|----------|--------|--------|
| 1         | AB_RAM_310_AS-H_15_01_RAC | 1    | 1   | 21.641               | 16603866 | 49.93  | 257196 |
| 2         | AB_RAM_310_AS-H_15_01_RAC | 1    | 1   | 16.432               | 16651571 | 50.07  | 364755 |
| Mean      |                           |      |     | 19.057               |          |        |        |
| Std. Dev. |                           |      |     | 3.641                |          |        |        |

Reported by User: System

Project Name: AB Research Group

Report Method: Peak Summary Report

Date Printed:

Report Method ID 1009

10-03-2023

Page: 1 of 2

16:01:31 Asia/Calcutta

**Peak Summary with Statistics**

Name:

|       | Sample Name | Vial | Inj | Retention Time (min) | Area | % Area | Height |
|-------|-------------|------|-----|----------------------|------|--------|--------|
| % RSD |             |      |     | 19.10                |      |        |        |

**HPLC Data for [(±)-11]-(AS-H Column)**

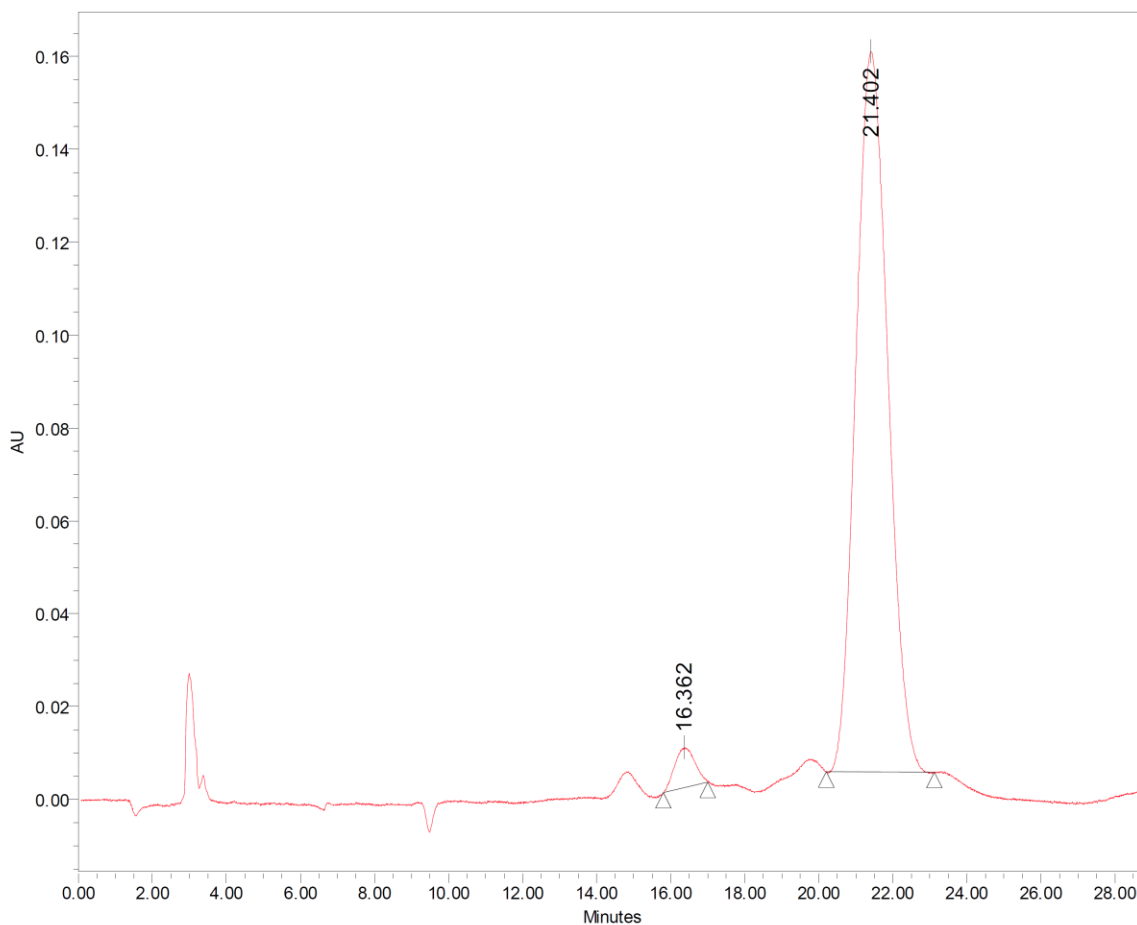

Sample Name: AB\_RAM\_310\_AS-H\_15\_1\_CHI; Date Acquired: 10-03-2023 22:36:48 IST; Vial: 1  
Injection: 1

**Peak Summary with Statistics**  
**Name:**

|           | Sample Name              | Vial | Inj | Retention Time (min) | Area    | % Area | Height |
|-----------|--------------------------|------|-----|----------------------|---------|--------|--------|
| 1         | AB_RAM_310_AS-H_15_1_CHI | 1    | 1   | 21.402               | 9311757 | 96.61  | 155198 |
| 2         | AB_RAM_310_AS-H_15_1_CHI | 1    | 1   | 16.362               | 326308  | 3.39   | 8643   |
| Mean      |                          |      |     | 18.882               |         |        |        |
| Std. Dev. |                          |      |     | 3.564                |         |        |        |

Reported by User: System  
Report Method: Peak Summary Report  
Report Method ID 1009  
Page: 1 of 2

Project Name: AB Research Group  
Date Printed:  
10-03-2023  
23:18:48 Asia/Calcutta

**HPLC Data for [(-)-11]-(AS-H Column)**



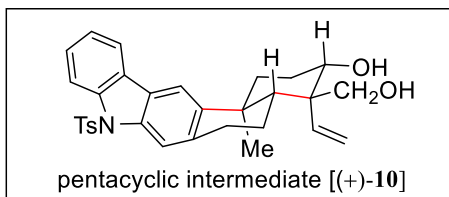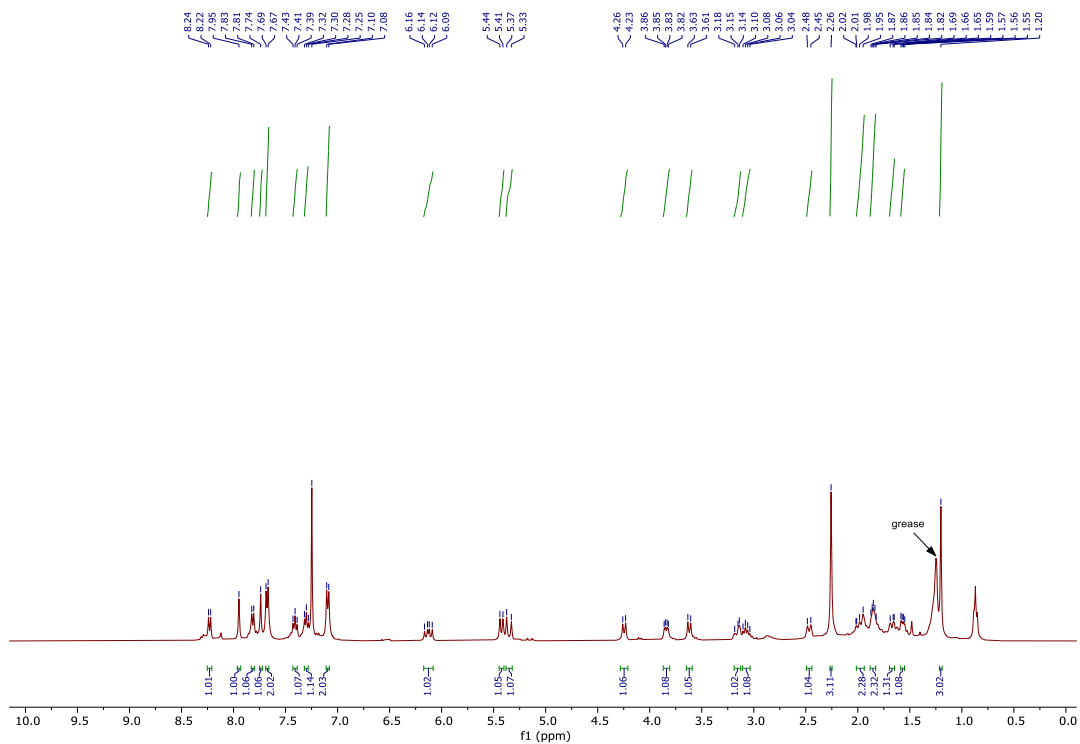

<sup>1</sup>H NMR (500 MHz, CDCl<sub>3</sub>) of compound [(+)-10]

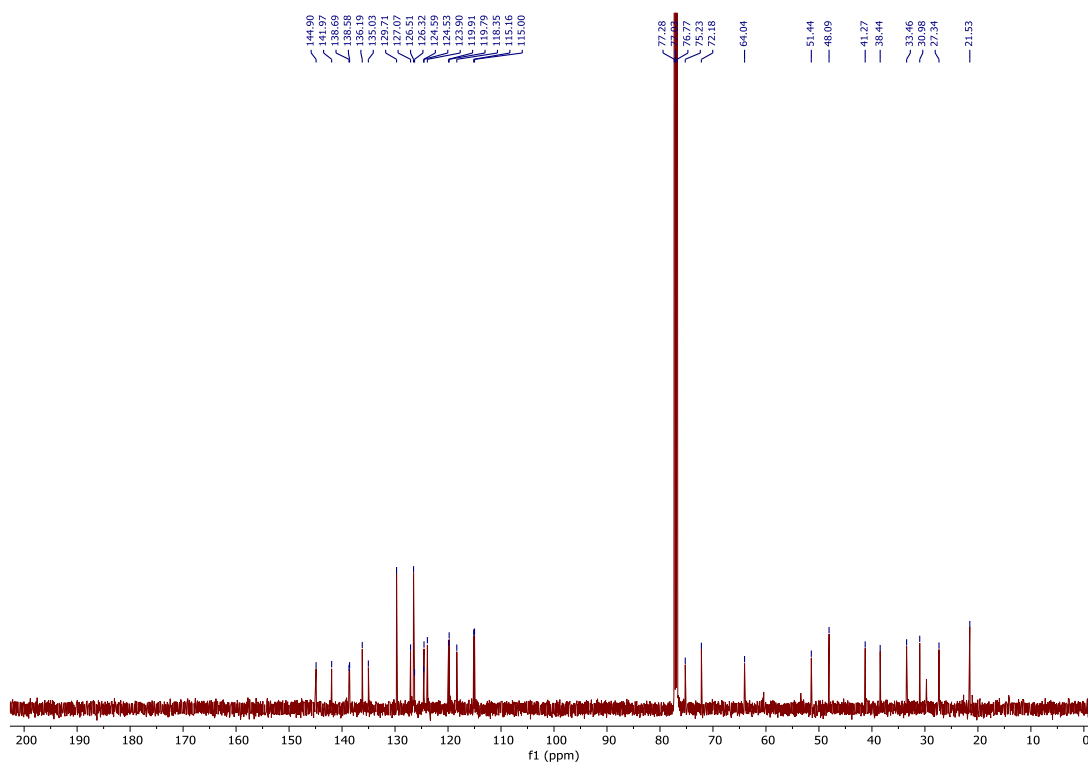

<sup>13</sup>C NMR (126 MHz, CDCl<sub>3</sub>) of compound [(+)-10]

## Display Report

### Analysis Info

Analysis Name D:\Data\User\_data\2022\DEC\lab-ram-337.d  
Method Tune\_pos\_Standard\_July2022.m  
Sample Name ab-ram-337  
Comment

Acquisition Date 12/2/2022 3:49:26 PM  
Operator IISER Kolkata  
Instrument maXis impact 8282001.00127

### Acquisition Parameter

|             |          |                      |          |                  |           |
|-------------|----------|----------------------|----------|------------------|-----------|
| Source Type | ESI      | Ion Polarity         | Positive | Set Nebulizer    | 0.4 Bar   |
| Focus       | Active   | Set Capillary        | 4500 V   | Set Dry Heater   | 200 °C    |
| Scan Begin  | 50 m/z   | Set End Plate Offset | -500 V   | Set Dry Gas      | 4.0 l/min |
| Scan End    | 1000 m/z | Set Charging Voltage | 2000 V   | Set Divert Valve | Source    |
|             |          | Set Corona           | 0 nA     | Set APCI Heater  | 0 °C      |

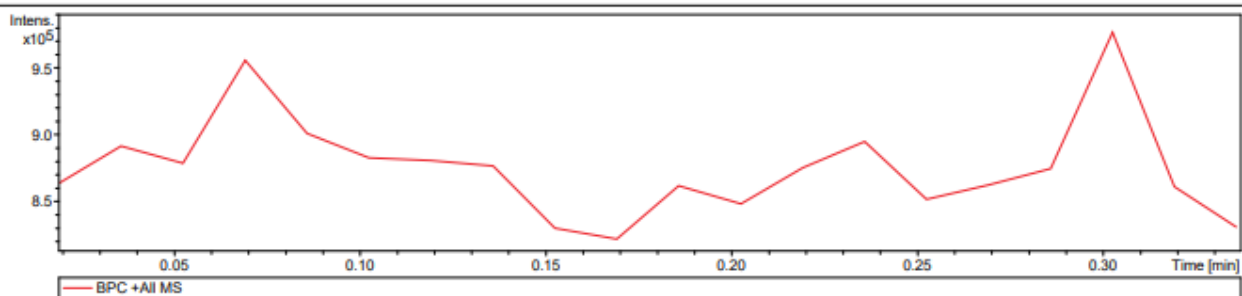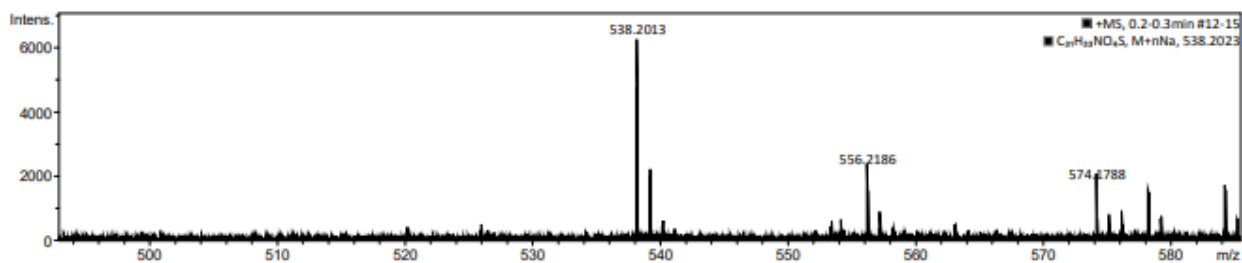

ab-ram-337.d

Bruker Compass DataAnalysis 4.1

printed: 12/2/2022 3:53:21 PM

by: IISER Kolkata

Page 1 of 1

HRMS data of [(+)-10]

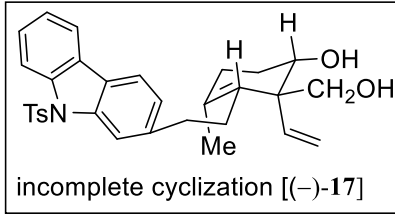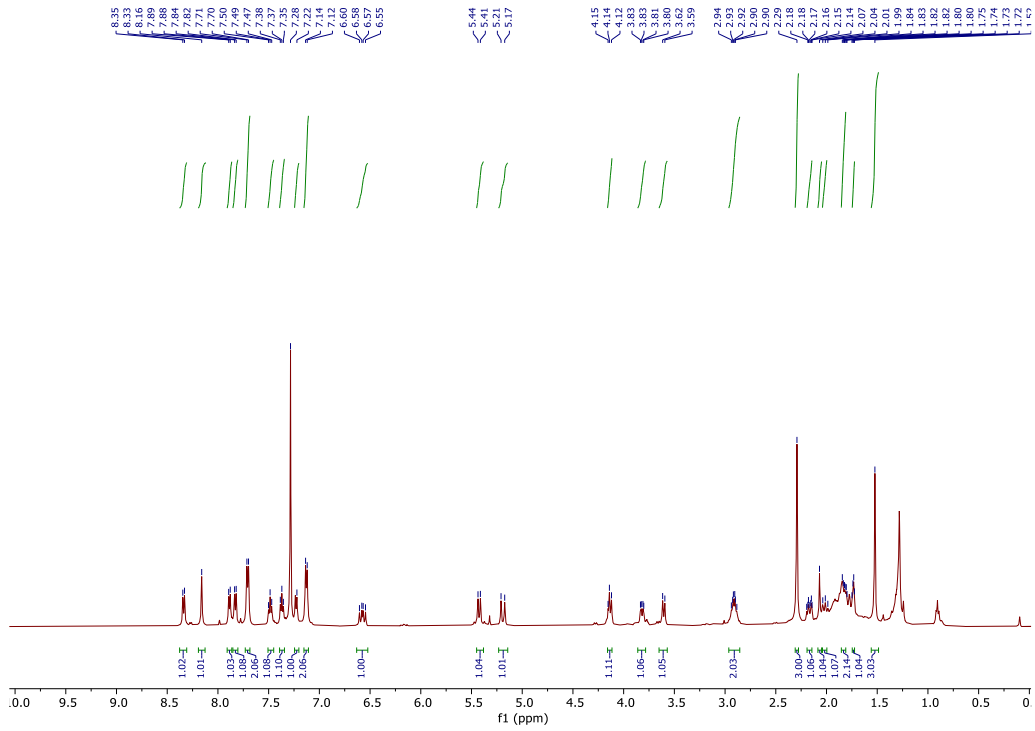

$^1\text{H}$  NMR (500 MHz,  $\text{CDCl}_3$ ) of compound [(-)-17]

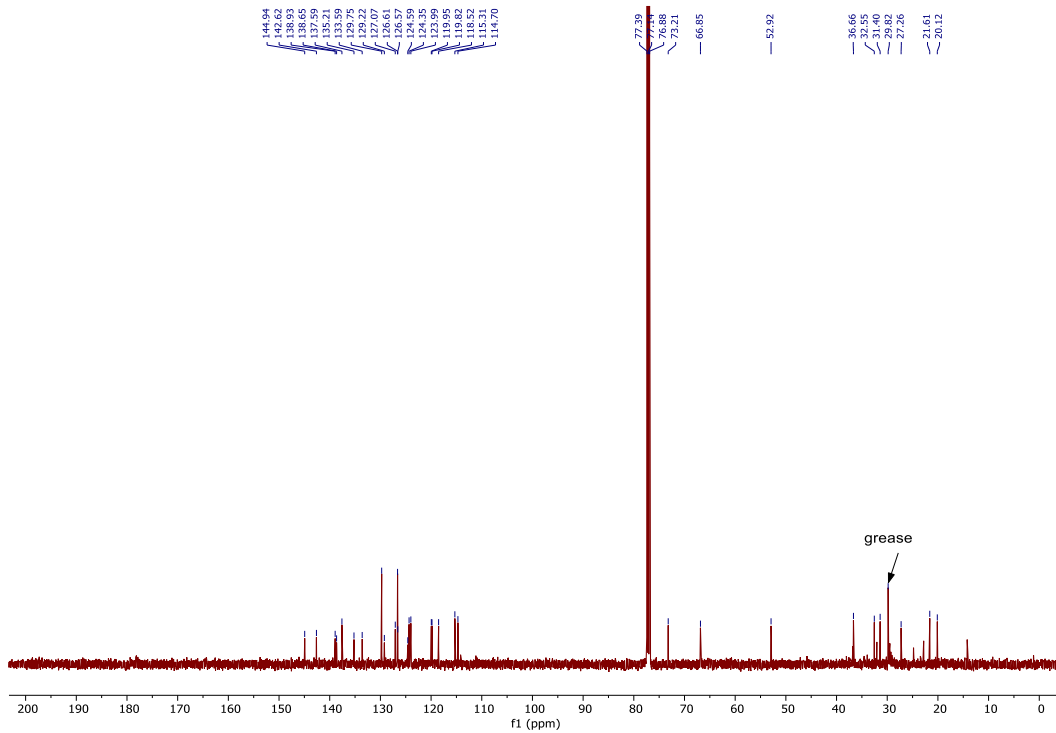

$^{13}\text{C}$  NMR (126 MHz,  $\text{CDCl}_3$ ) of compound [(-)-17]

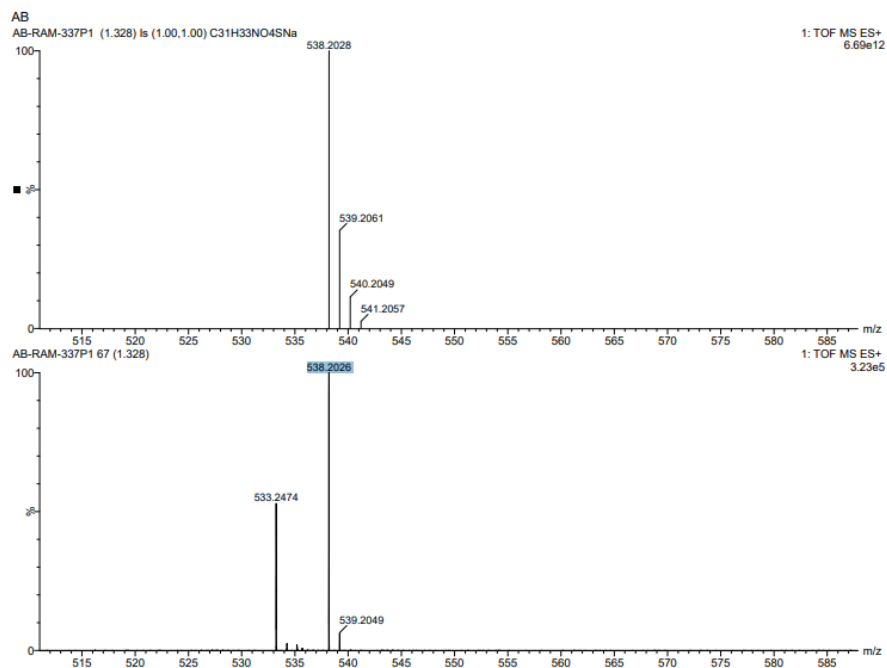

HRMS data of [(-)-17]

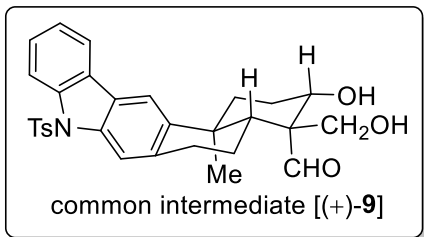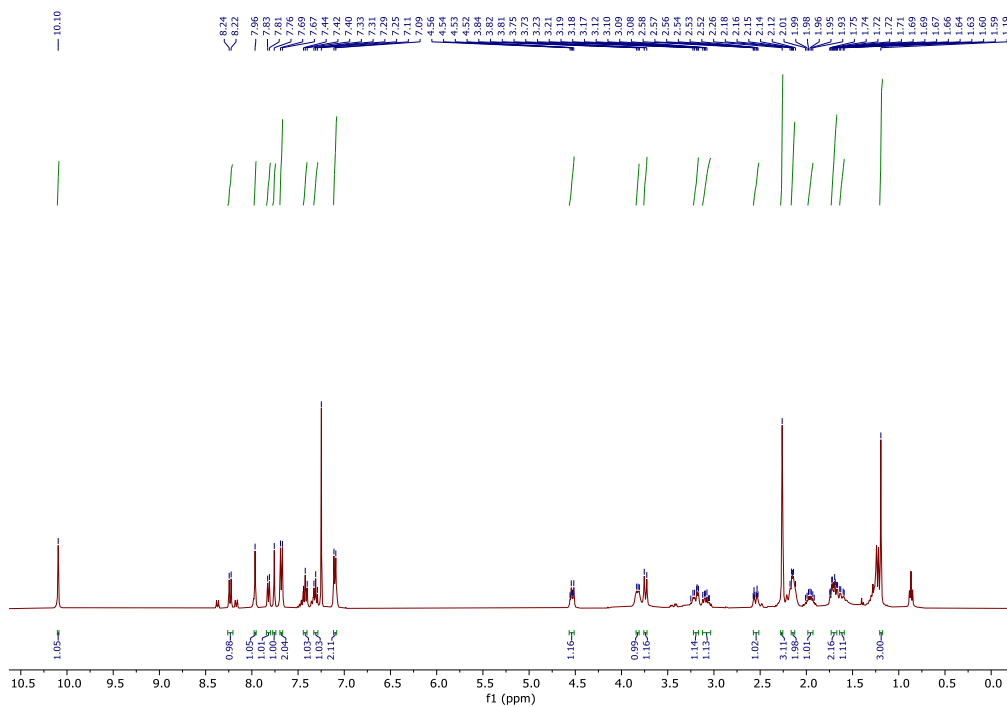

$^1\text{H}$  NMR (400 MHz,  $\text{CDCl}_3$ ) of [(+)-9]

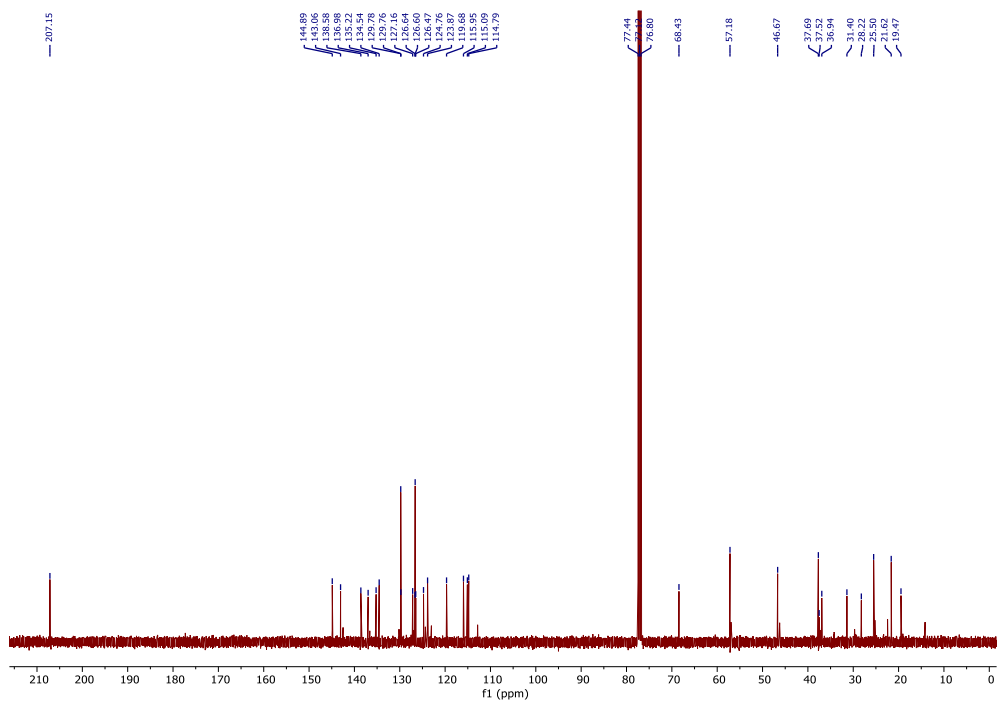

$^{13}\text{C}$  NMR (101 MHz,  $\text{CDCl}_3$ ) of [(+)-9]

AB26-Dec-2023 12:36:55

IISER - KOLKATA

AB-SK-02-254 (0.053) Is (1.00,1.00) C30H32NO5S

1: TOF MS ES+  
6.75e12

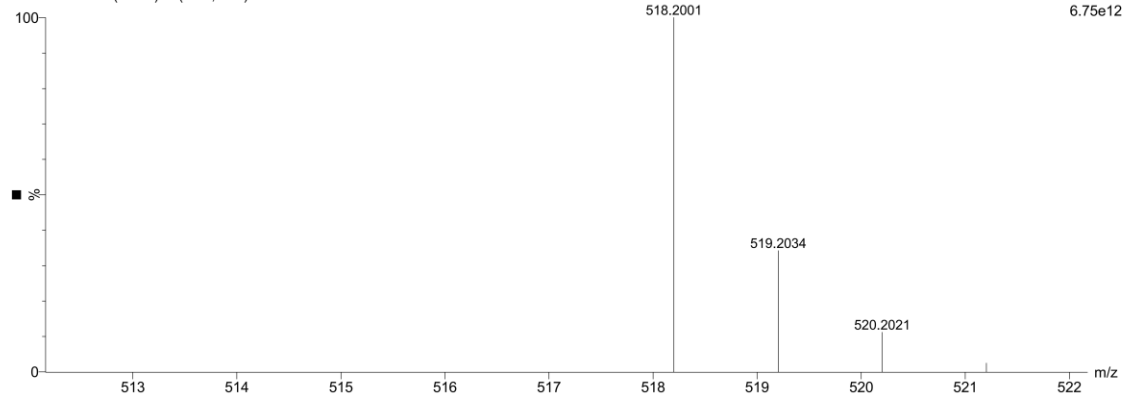

AB-SK-02-254 2 (0.070) AM2 (Ar,22000.0,556.28,0.00,LS 10); ABS

1: TOF MS ES+  
7.43e4

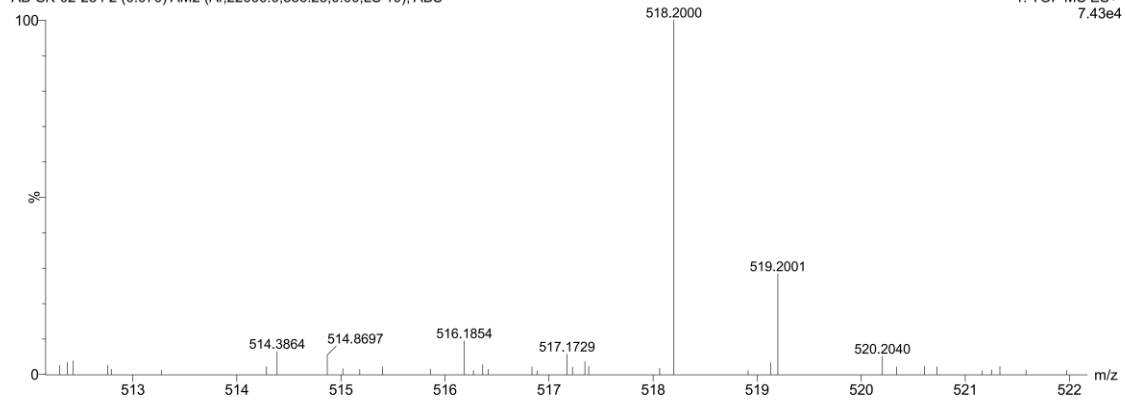

HRMS data of [(+)-9]

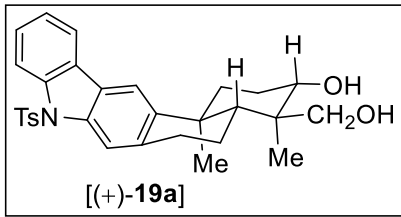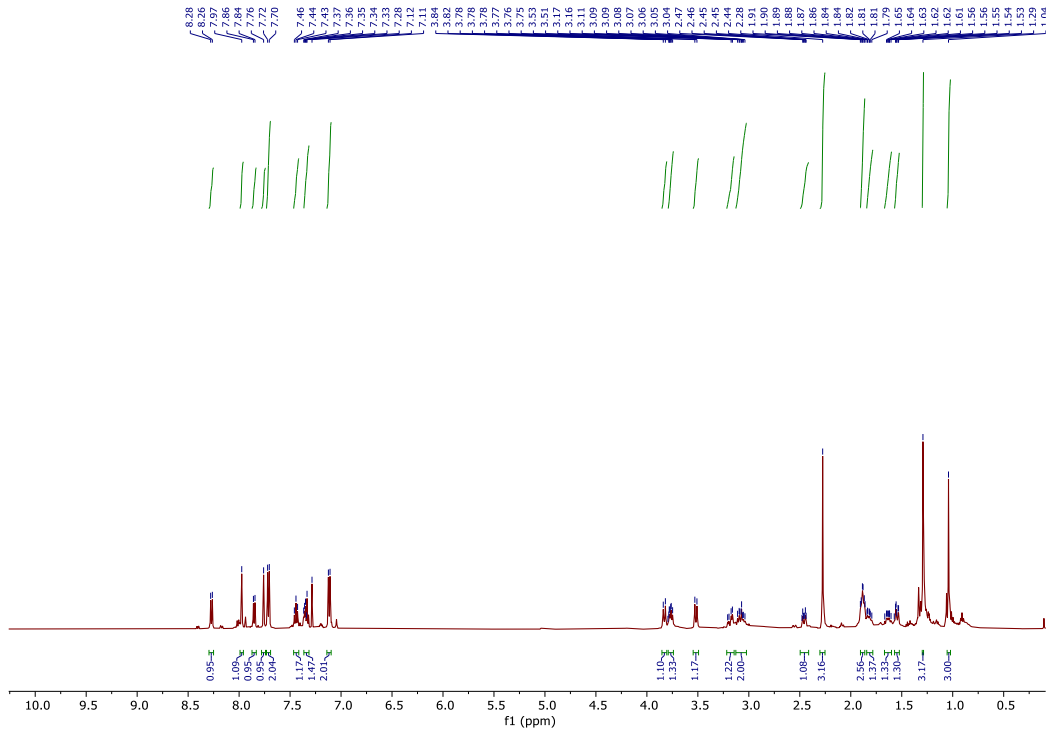

**<sup>1</sup>H NMR (500 MHz, CDCl<sub>3</sub>) of [(+)-19a]**

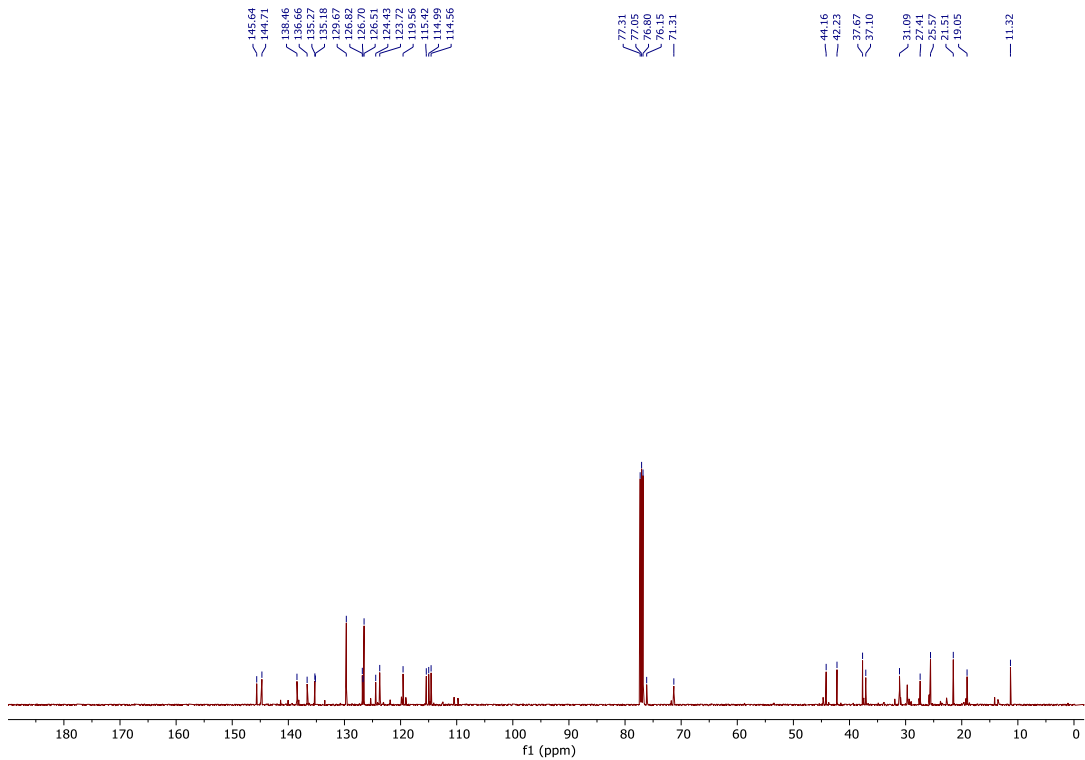

**<sup>13</sup>C NMR (126 MHz, CDCl<sub>3</sub>) of [(+)-19a]**

# Display Report

## Analysis Info

Analysis Name D:\Data\User data\2022\DEC\AB\_RN\_03240P.d  
Method Tune\_pos\_Standard\_July2022.m  
Sample Name AB\_RN\_03240P  
Comment

Acquisition Date 12/5/2022 11:12:25 AM  
Operator IISER Kolkata  
Instrument maXis impact 8282001.00127

## Acquisition Parameter

|             |          |                      |          |                  |           |
|-------------|----------|----------------------|----------|------------------|-----------|
| Source Type | ESI      | Ion Polarity         | Positive | Set Nebulizer    | 0.4 Bar   |
| Focus       | Active   | Set Capillary        | 4500 V   | Set Dry Heater   | 200 °C    |
| Scan Begin  | 50 m/z   | Set End Plate Offset | -500 V   | Set Dry Gas      | 4.0 l/min |
| Scan End    | 1000 m/z | Set Charging Voltage | 2000 V   | Set Divert Valve | Source    |
|             |          | Set Corona           | 0 nA     | Set APCI Heater  | 0 °C      |

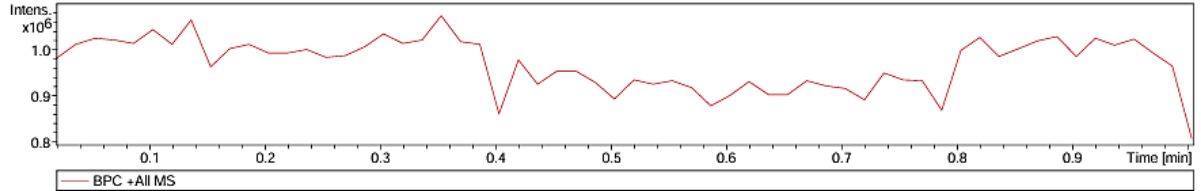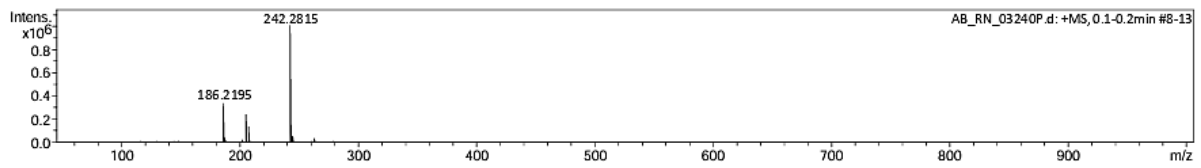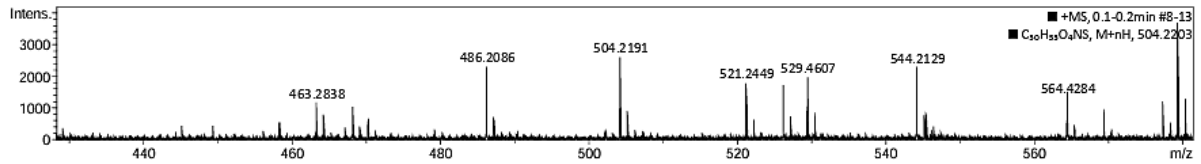

HRMS data of [(+)-19a]



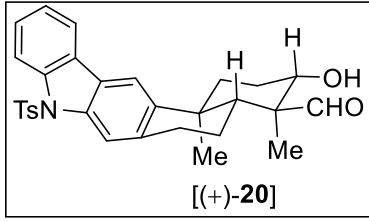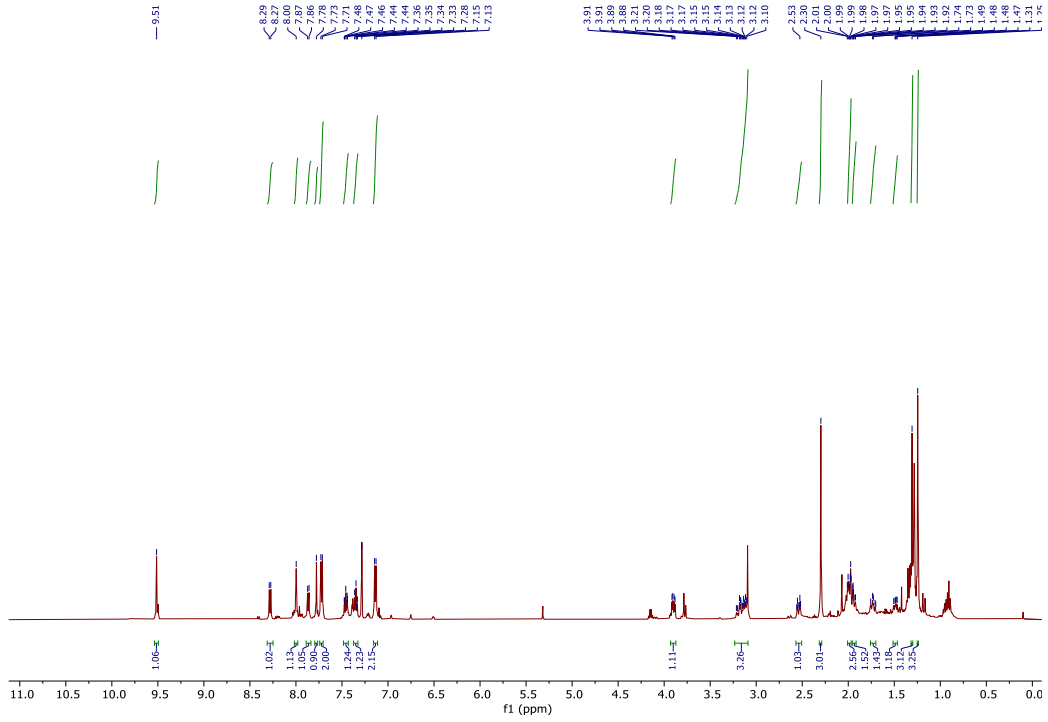

$^1\text{H NMR}$  (500 MHz,  $\text{CDCl}_3$ ) of (+)-20

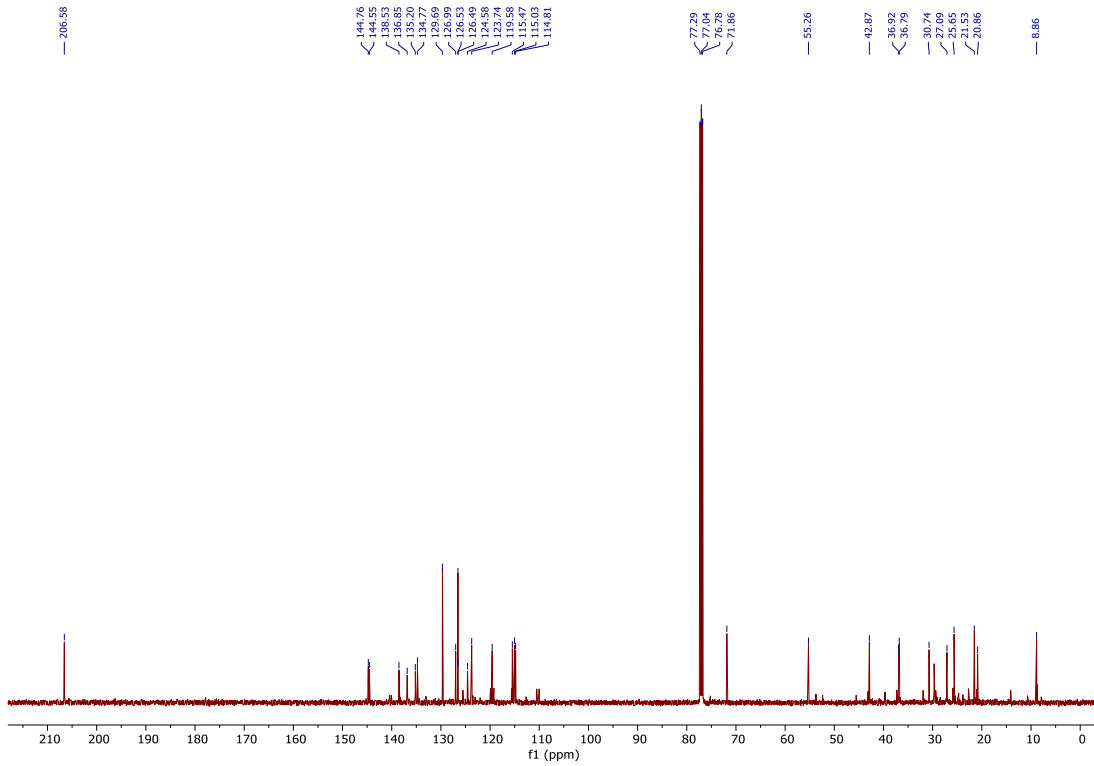

$^{13}\text{C NMR}$  (126 MHz,  $\text{CDCl}_3$ ) of (+)-20

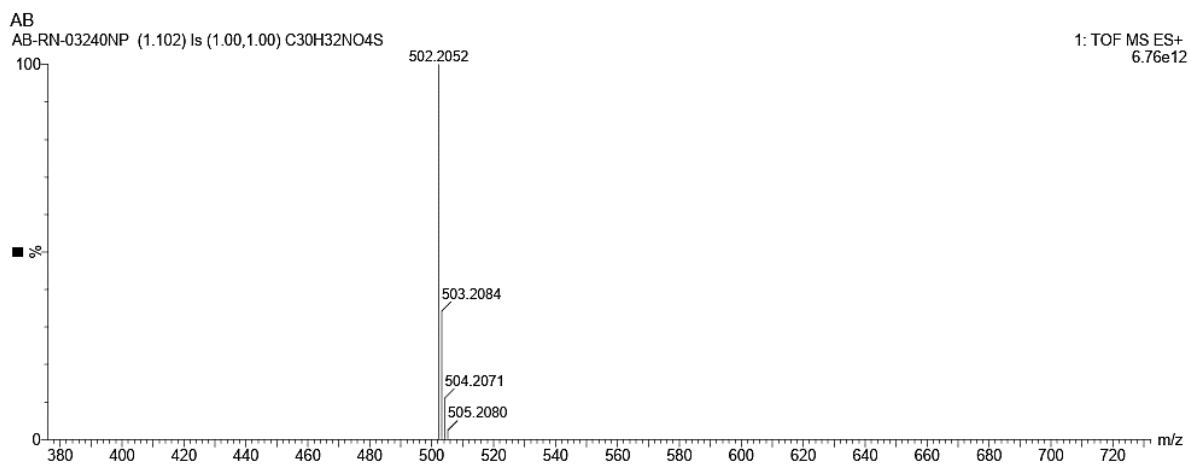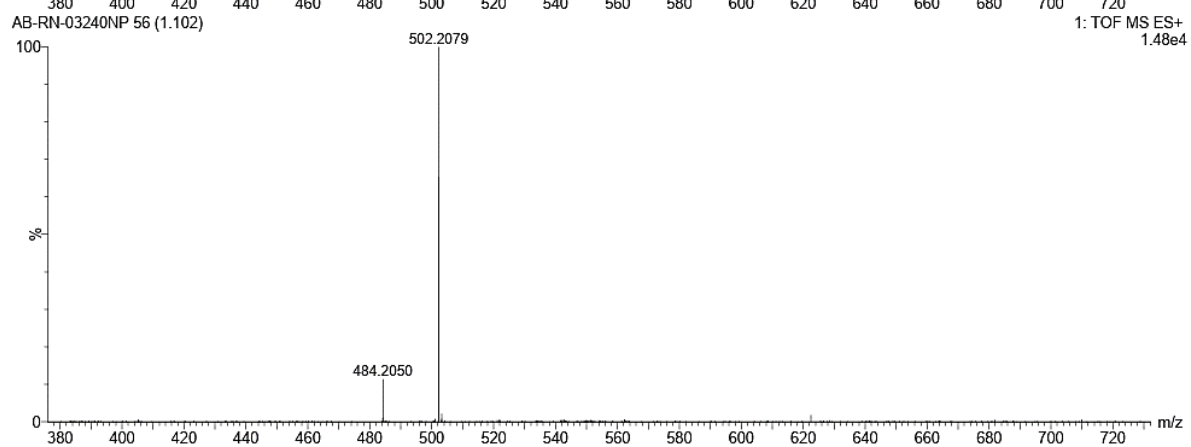

HRMS data of [(+)-20]

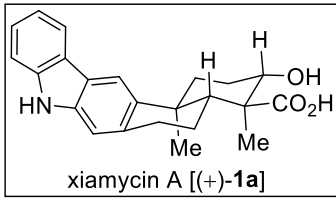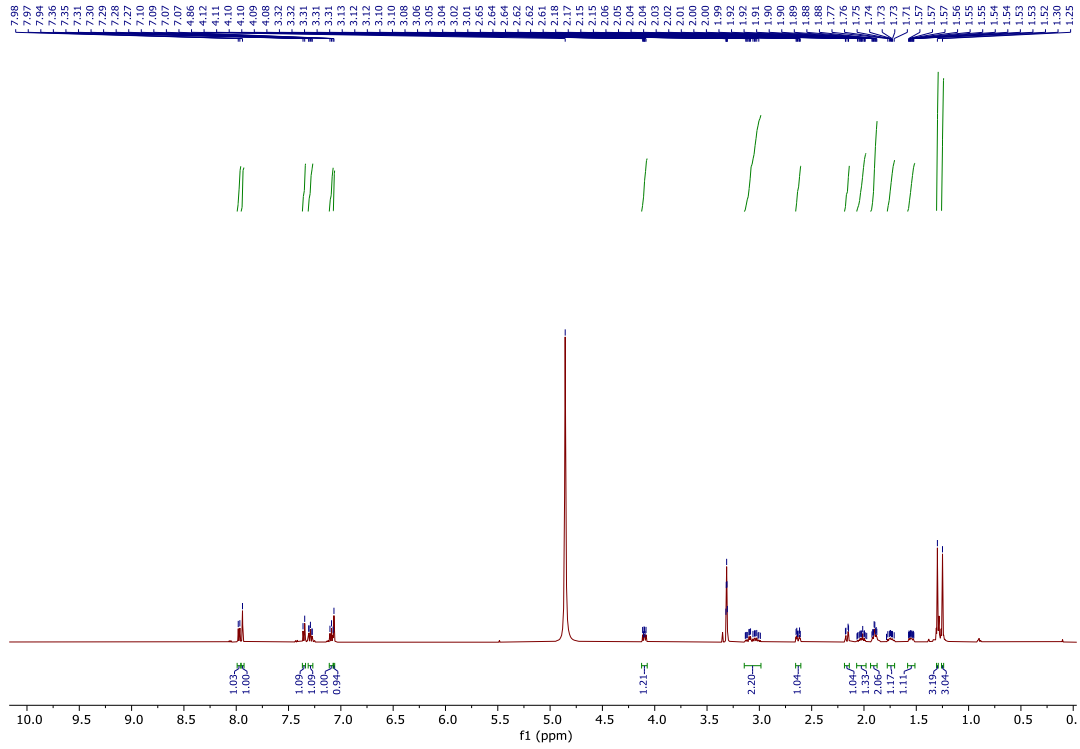

<sup>1</sup>H NMR (500 MHz, CD<sub>3</sub>OD) of xiamycin A [(+)-1a]

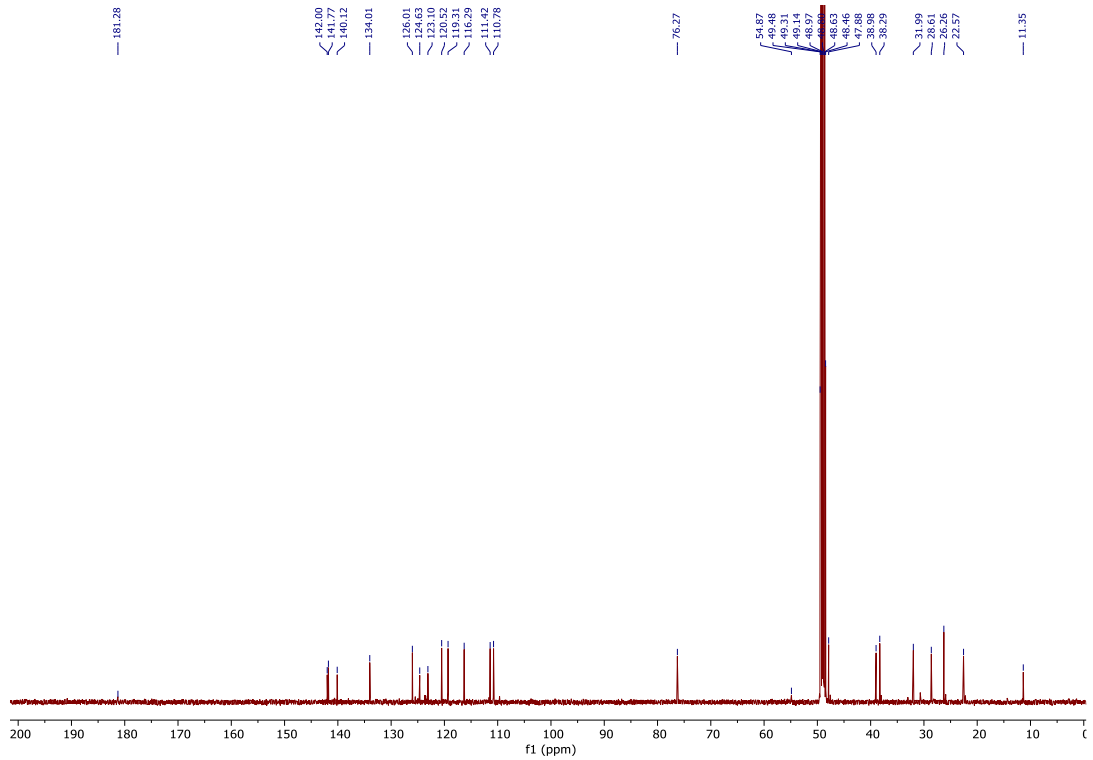

<sup>13</sup>C NMR (126 MHz, CD<sub>3</sub>OD) of xiamycin A [(+)-1a]

# Display Report

## Analysis Info

Analysis Name D:\Data\User data\2022\MAY\ab\_rn\_03079.d  
Method Tune\_pos\_Standard.m  
Sample Name ab\_rn\_03079  
Comment

Acquisition Date 5/12/2022 11:48:58 AM

Operator IISER Kolkata  
Instrument maXis impact 8282001.00127

## Acquisition Parameter

|             |          |                      |          |                  |           |
|-------------|----------|----------------------|----------|------------------|-----------|
| Source Type | ESI      | Ion Polarity         | Positive | Set Nebulizer    | 0.5 Bar   |
| Focus       | Active   | Set Capillary        | 3400 V   | Set Dry Heater   | 200 °C    |
| Scan Begin  | 50 m/z   | Set End Plate Offset | -500 V   | Set Dry Gas      | 4.0 l/min |
| Scan End    | 1000 m/z | Set Charging Voltage | 2000 V   | Set Divert Valve | Source    |
|             |          | Set Corona           | 0 nA     | Set APCI Heater  | 0 °C      |

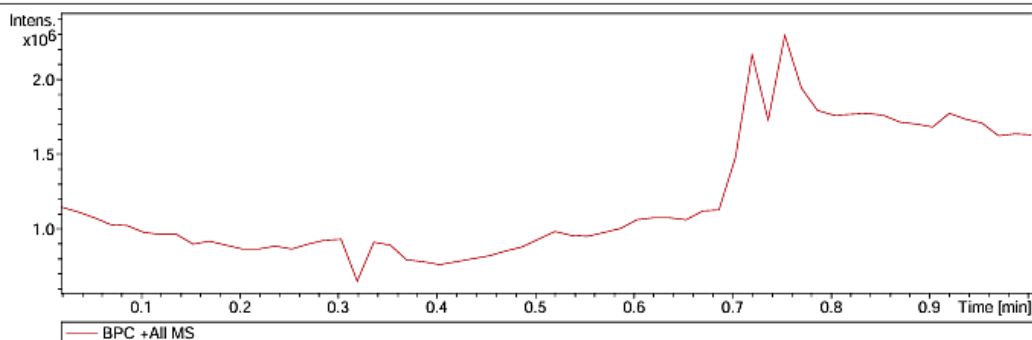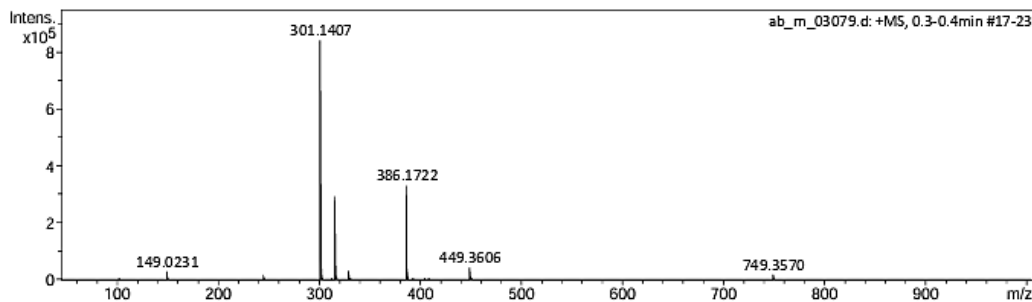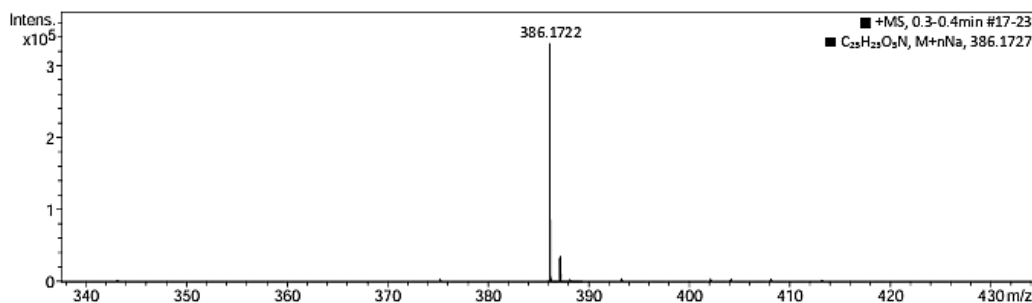

ab\_rn\_03079.d

Bruker Compass DataAnalysis 4.1

printed: 5/12/2022 11:55:13 AM

by: IISER Kolkata

Page 1 of 1

HRMS data of xiamycin A [(+)-1a]

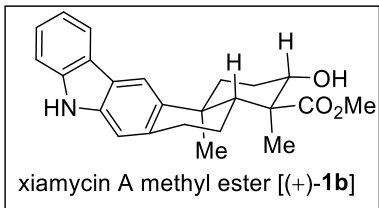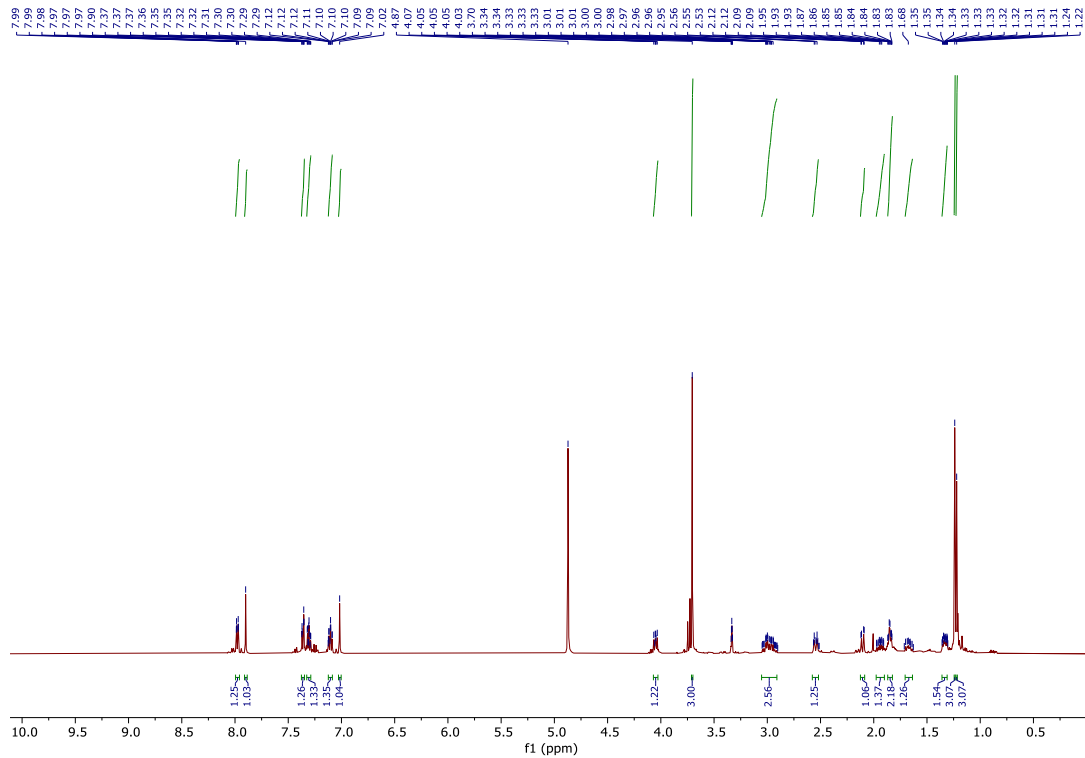

<sup>1</sup>H NMR (500 MHz, CD<sub>3</sub>OD) of xiamycin A methyl ester [(+)-**1b**]

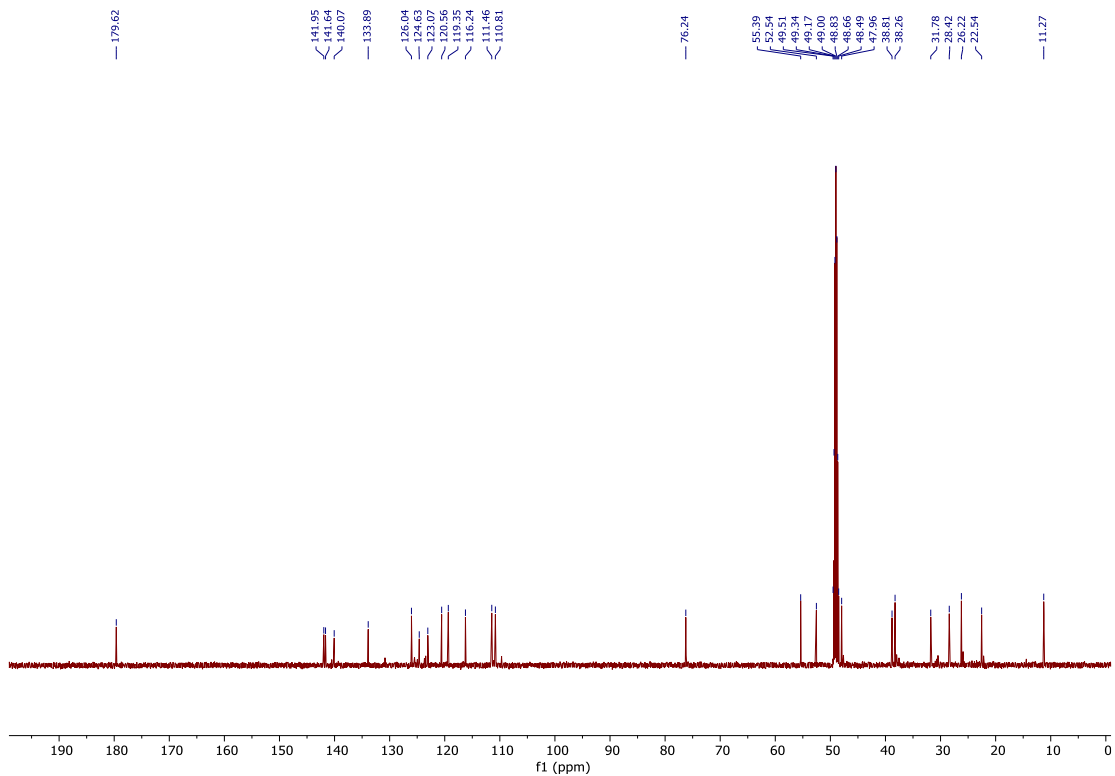

<sup>13</sup>C NMR (126 MHz, CD<sub>3</sub>OD) of xiamycin A methyl ester [(+)-**1b**]

# Display Report

**Analysis Info**  
Analysis Name: D:\Data\User data\2022\NOV\AB-rn\_03220.d  
Method: Tune\_pos\_Standard\_July2022.m  
Sample Name: AB-rn\_03220  
Comment:  
Acquisition Date: 11/29/2022 10:38:54 AM  
Operator: IISER Kolkata  
Instrument: maXis impact 8282001.00127

**Acquisition Parameter**  
Source Type: ESI  
Focus: Active  
Scan Begin: 50 m/z  
Scan End: 1000 m/z  
Ion Polarity: Positive  
Set Capillary: 4500 V  
Set End Plate Offset: -500 V  
Set Charging Voltage: 2000 V  
Set Corona: 0 nA  
Set Nebulizer: 0.4 Bar  
Set Dry Heater: 200 °C  
Set Dry Gas: 4.0 l/min  
Set Divert Valve: Source  
Set APCI Heater: 0 °C

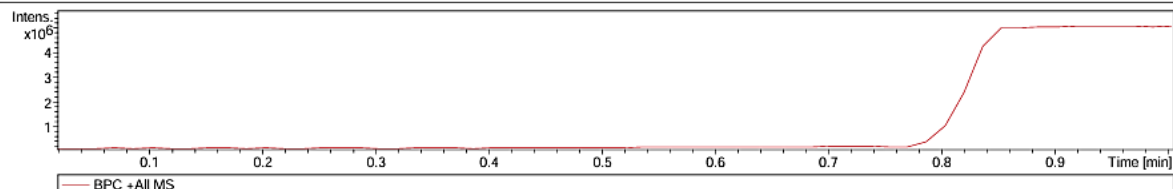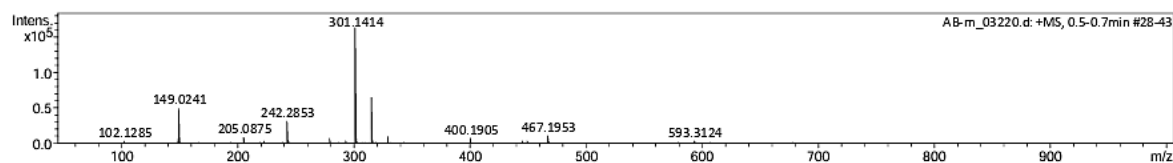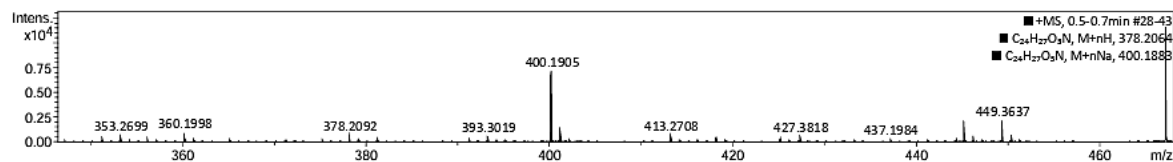

HRMS data of xiamycin A methyl ester [(+)-**1b**]

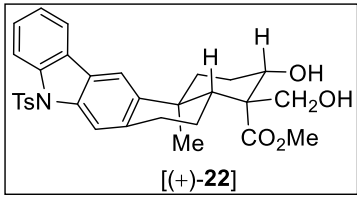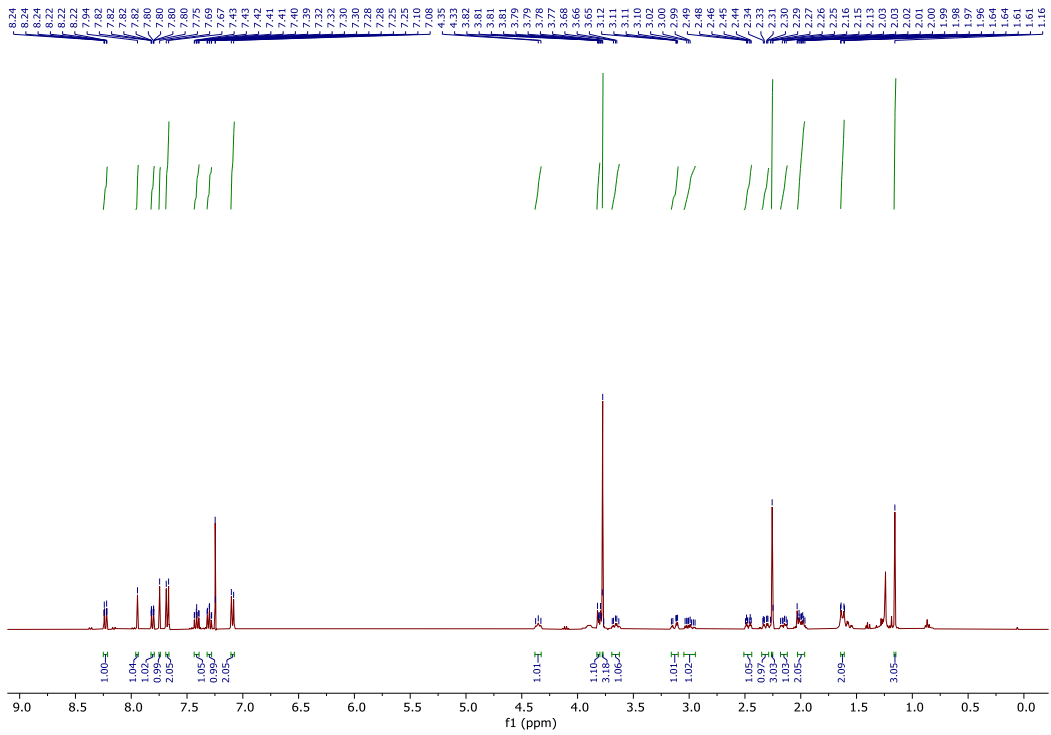

<sup>1</sup>H NMR (400 MHz, CDCl<sub>3</sub>) of **[(+)-22]**

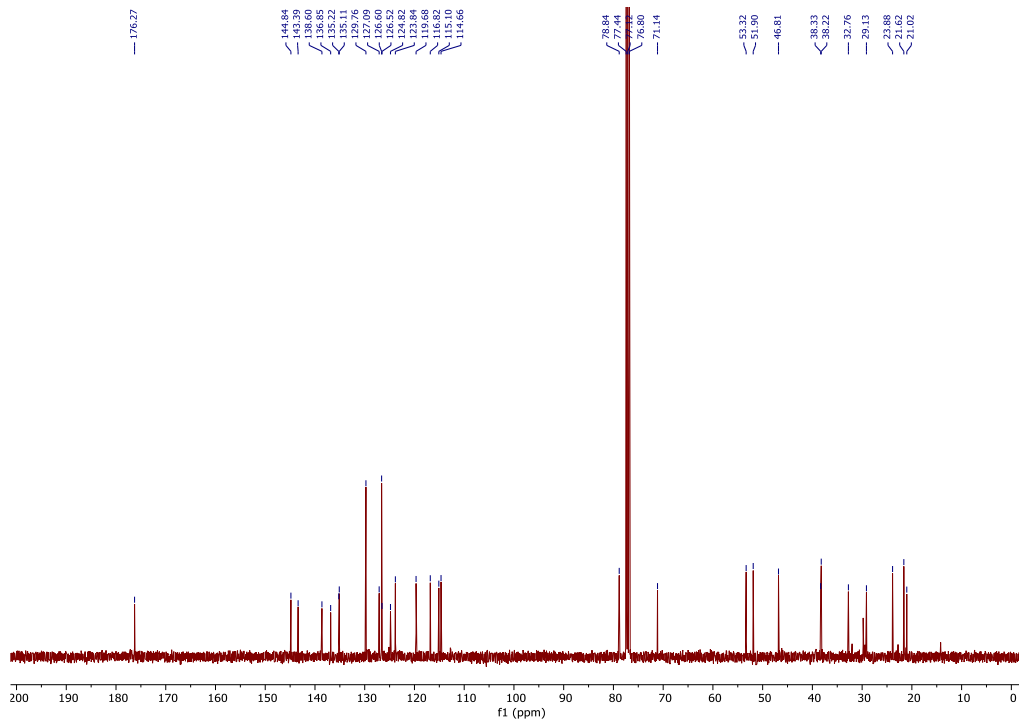

<sup>13</sup>C NMR (101 MHz, CDCl<sub>3</sub>) of **[(+)-22]**

AB17-Oct-2023 14:58:16

IISER - KOLKATA

1: TOF MS ES+  
6.66e12

AB-SK-02-236 (0.053) Is (1.00,1.00) C31H34NO6S

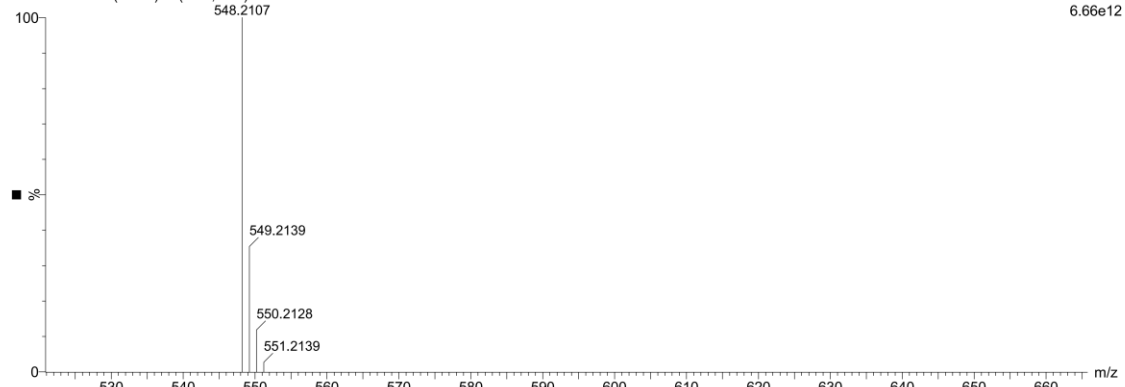

AB-SK-02-236 37 (0.741) AM2 (Ar,22000.0,556.28,0.00,LS 10)

1: TOF MS ES+  
1.20e4

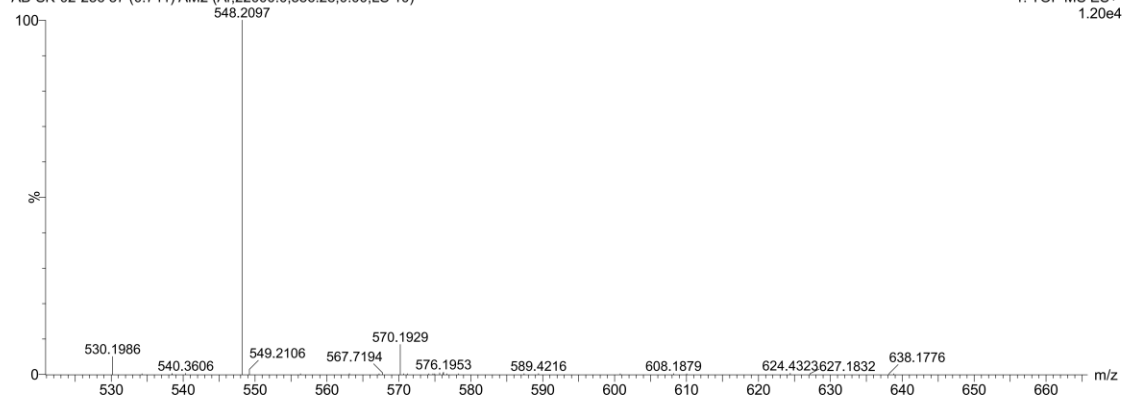

HRMS data of [(+)-22]



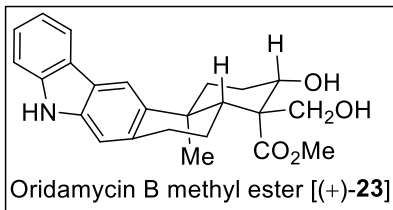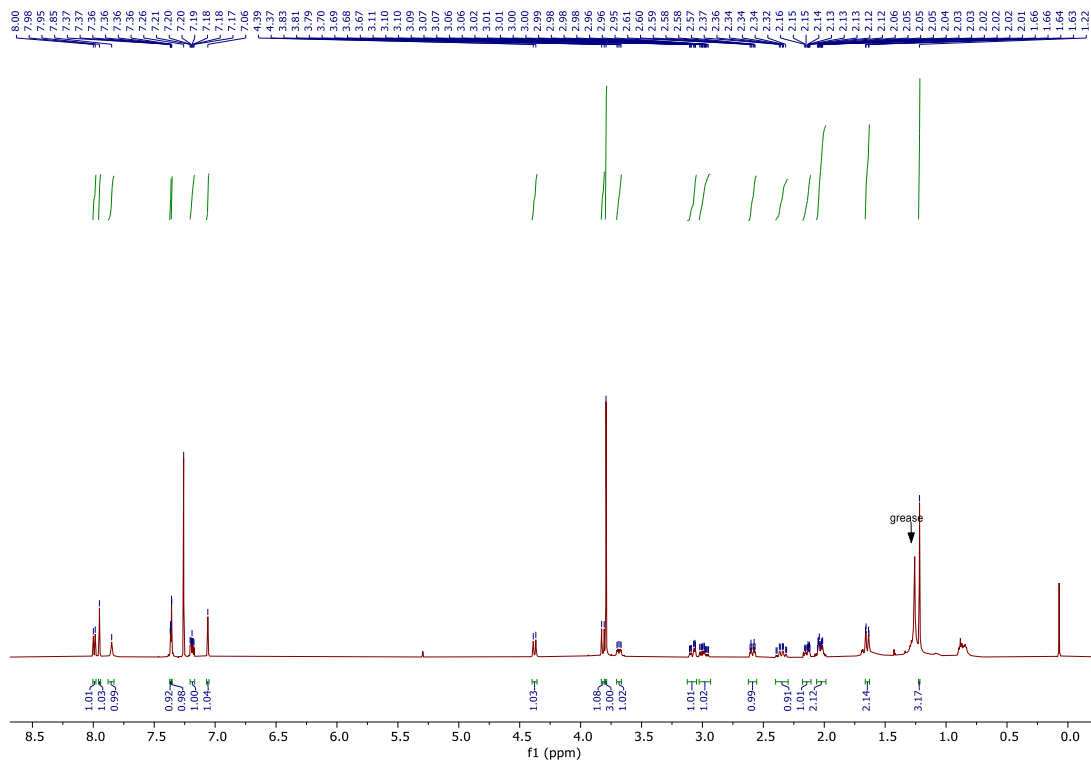

$^1\text{H}$  NMR (500 MHz,  $\text{CDCl}_3$ ) of Oridamycin B methyl ester [(+)-23]

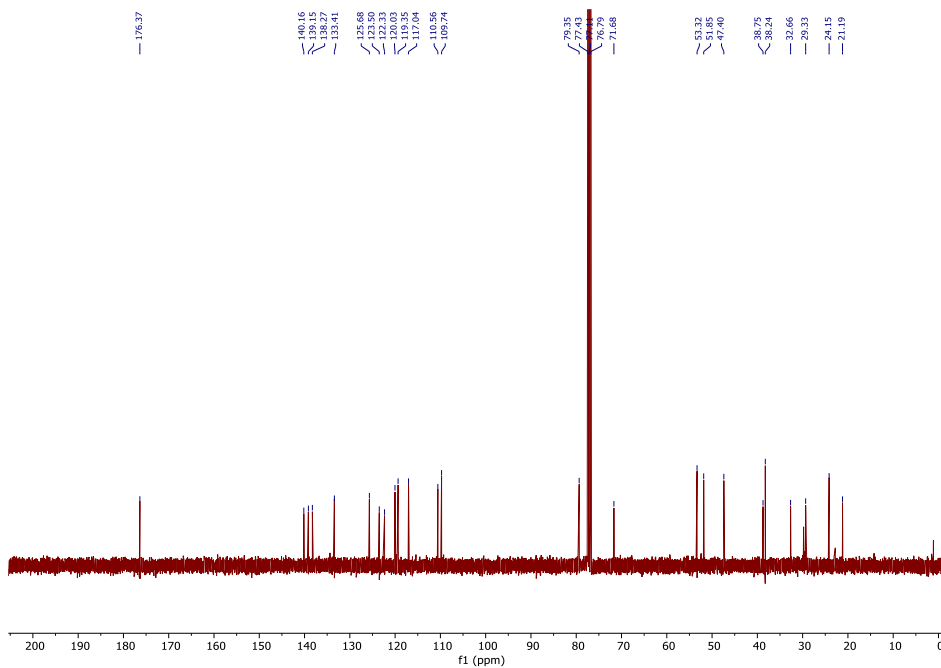

$^{13}\text{C}$  NMR (101 MHz,  $\text{CDCl}_3$ ) of Oridamycin B methyl ester [(+)-23]

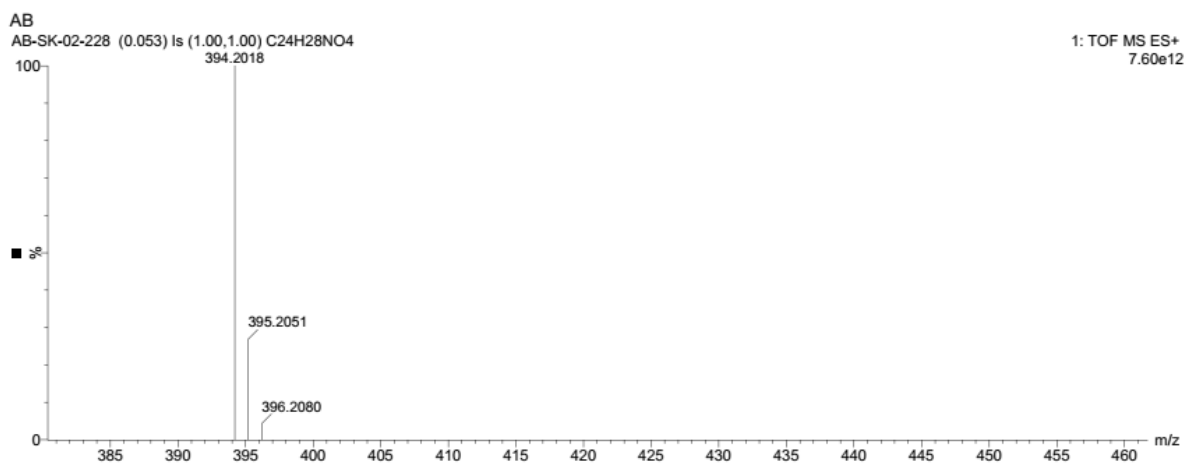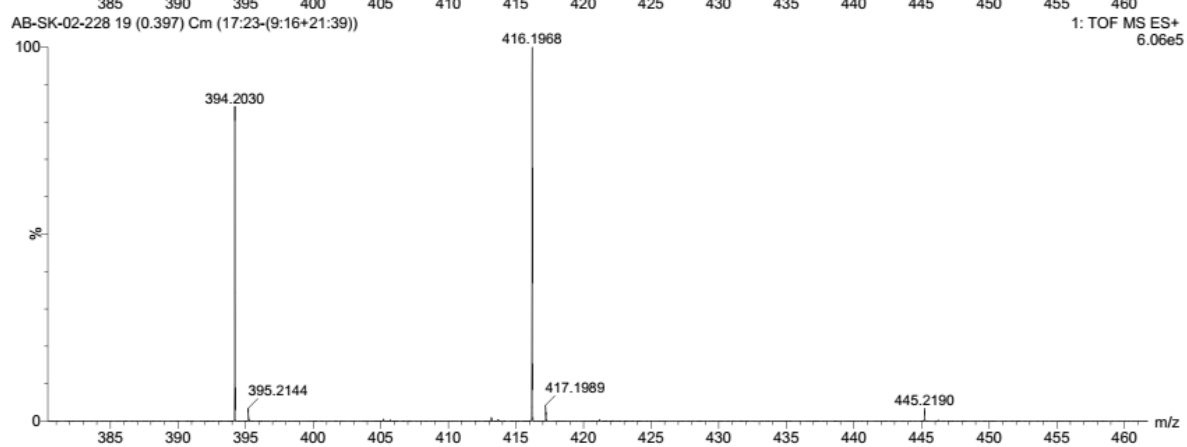

HRMS data of Oridamycin B methyl ester [(+)-**23**]

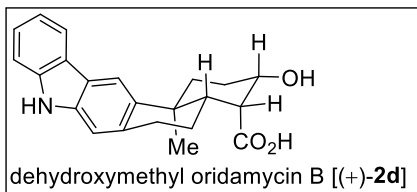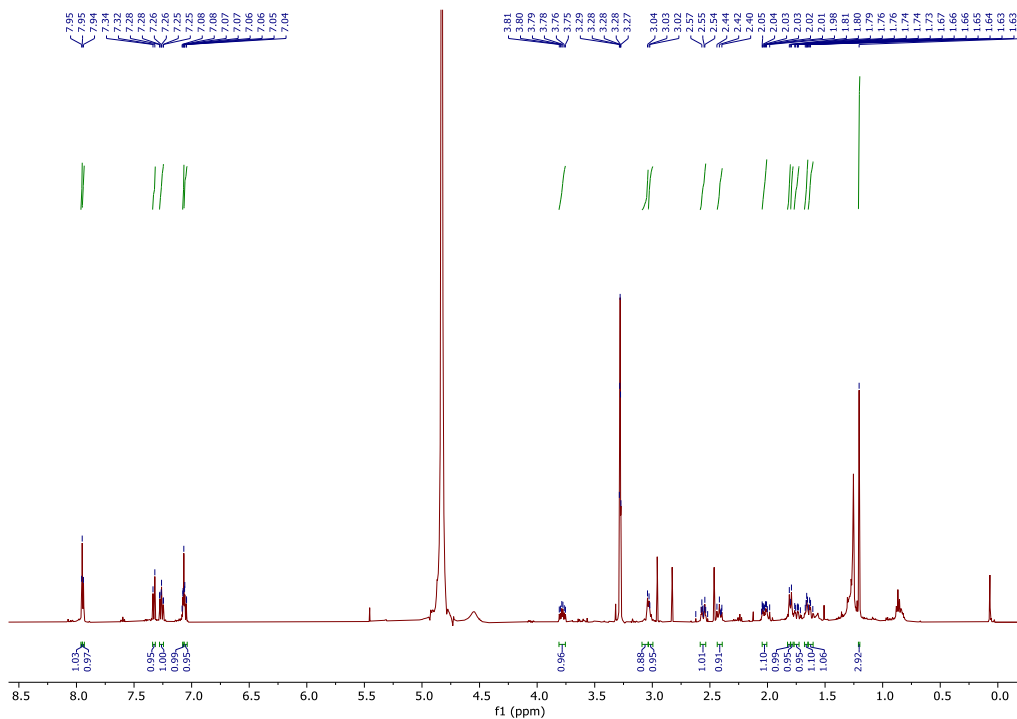

<sup>1</sup>H NMR (500 MHz, CD<sub>3</sub>OD) of dehydroxymethyl oridamycin B [(+)-2d]

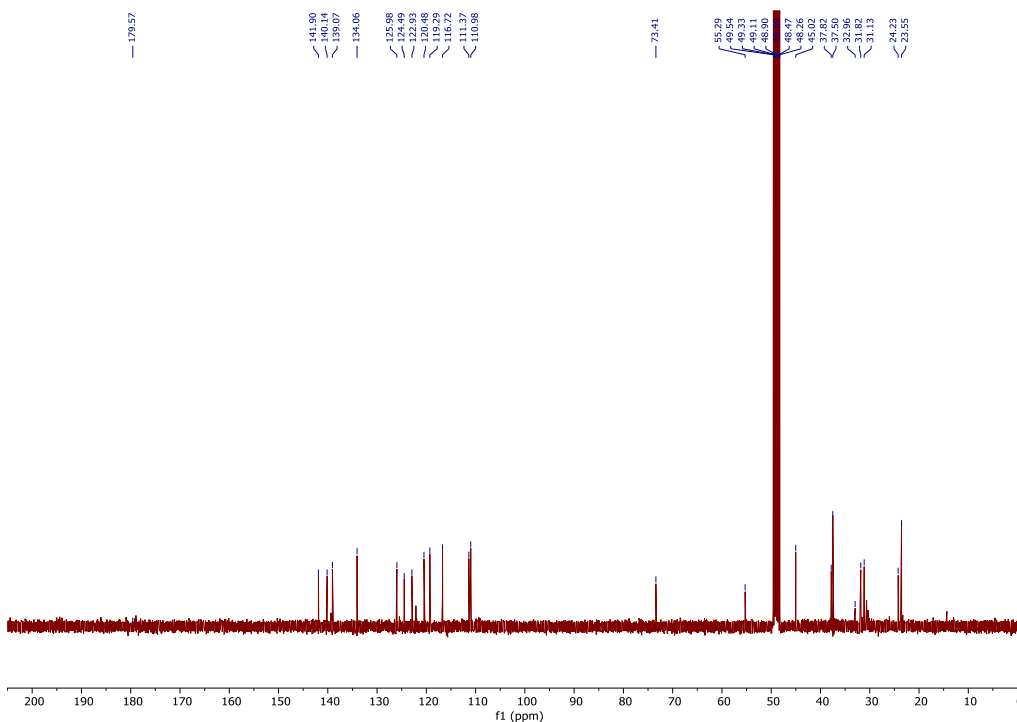

<sup>13</sup>C NMR (101 MHz, CD<sub>3</sub>OD) of dehydroxymethyl oridamycin B [(+)-2d]

## Display Report

### Analysis Info

Analysis Name D:\Data\User data\2024\JAN\lab\_sk\_02244np.d  
Method Tune\_pos\_Standard\_JAN2024.new.m  
Sample Name ab\_sk\_02244np  
Comment

Acquisition Date 1/31/2024 2:30:14 PM

Operator IISER Kolkata  
Instrument maXis impact 8282001.00127

### Acquisition Parameter

|             |          |                      |          |                  |           |
|-------------|----------|----------------------|----------|------------------|-----------|
| Source Type | ESI      | Ion Polarity         | Positive | Set Nebulizer    | 0.4 Bar   |
| Focus       | Active   | Set Capillary        | 4500 V   | Set Dry Heater   | 200 °C    |
| Scan Begin  | 50 m/z   | Set End Plate Offset | -500 V   | Set Dry Gas      | 4.0 l/min |
| Scan End    | 1000 m/z | Set Charging Voltage | 2000 V   | Set Divert Valve | Source    |
|             |          | Set Corona           | 0 nA     | Set APCI Heater  | 0 °C      |

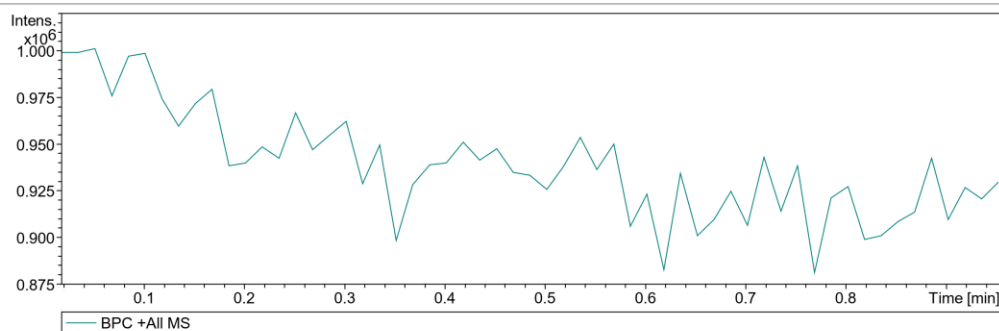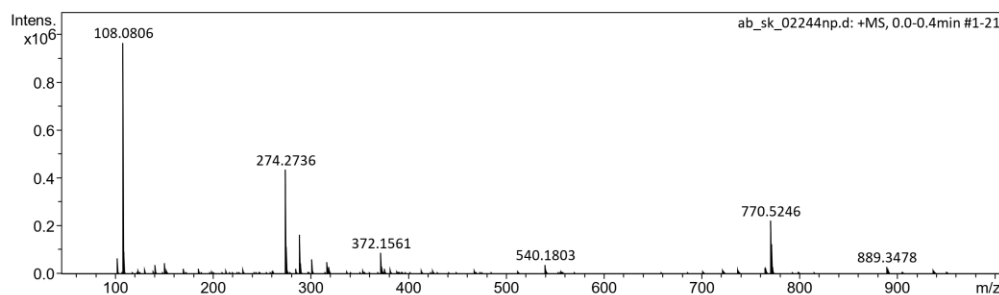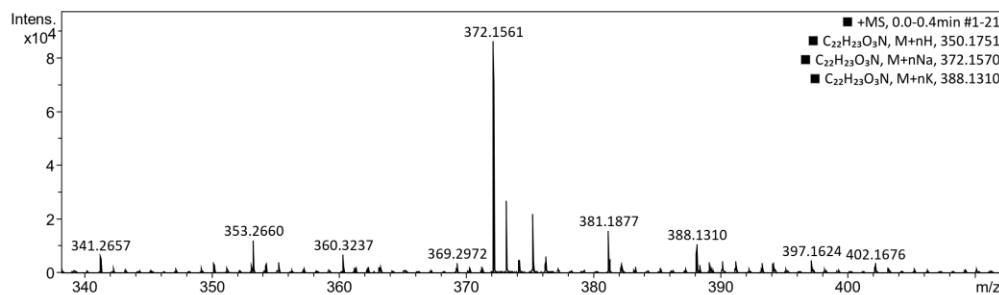

ab\_sk\_02244np.d

Bruker Compass DataAnalysis 4.1

printed: 1/31/2024 2:33:46 PM

by: IISER Kolkata

Page 1 of 1

HRMS data of dehydroxymethyl oridamycin B [(+)-**2d**]

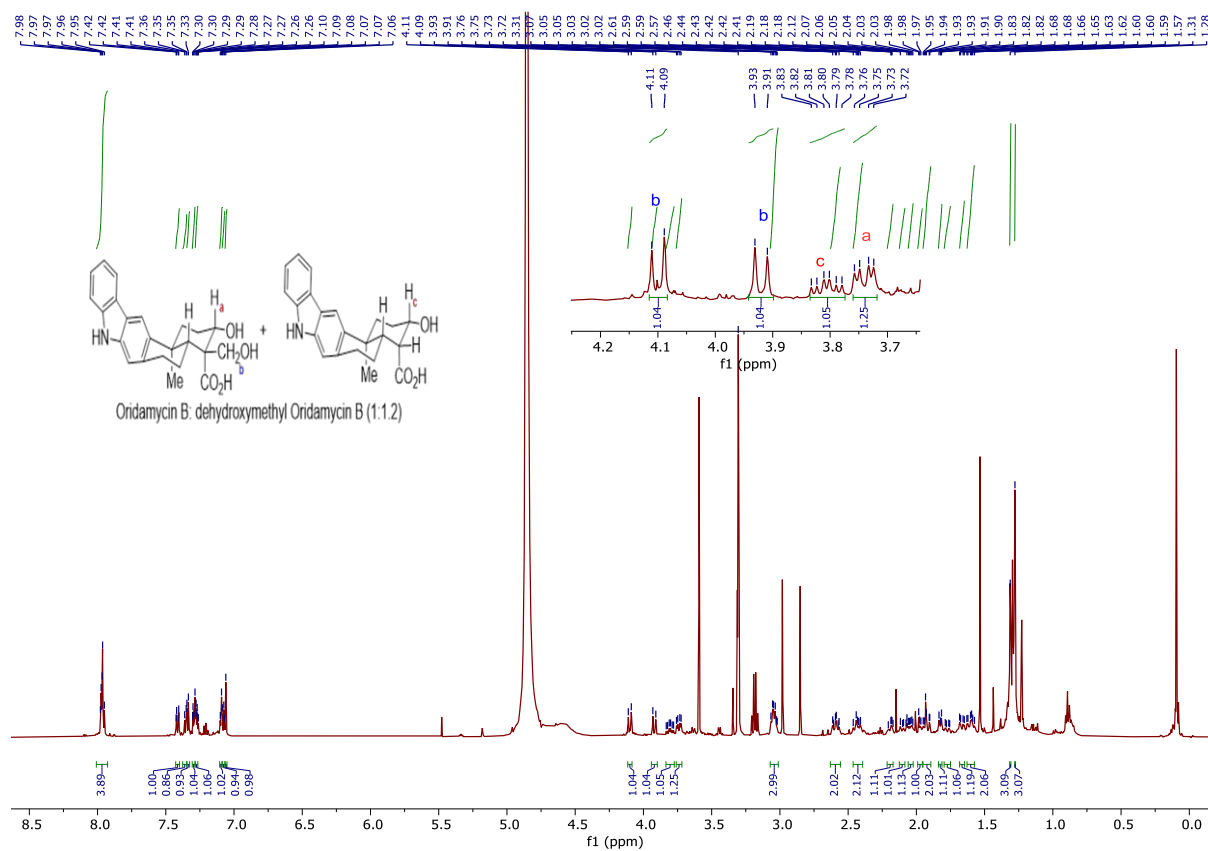

<sup>1</sup>H NMR of Crude reaction mixture on saponification of oridamycin B methyl ester B [(+)-**23**] (Entry No. 8, Table 5) in 500 MHz showing 1:1.2 ratio of oridamycin B [**2b**] and dehydroxymethyl oridamycin B [(+)-**2d**] in CD<sub>3</sub>OD.

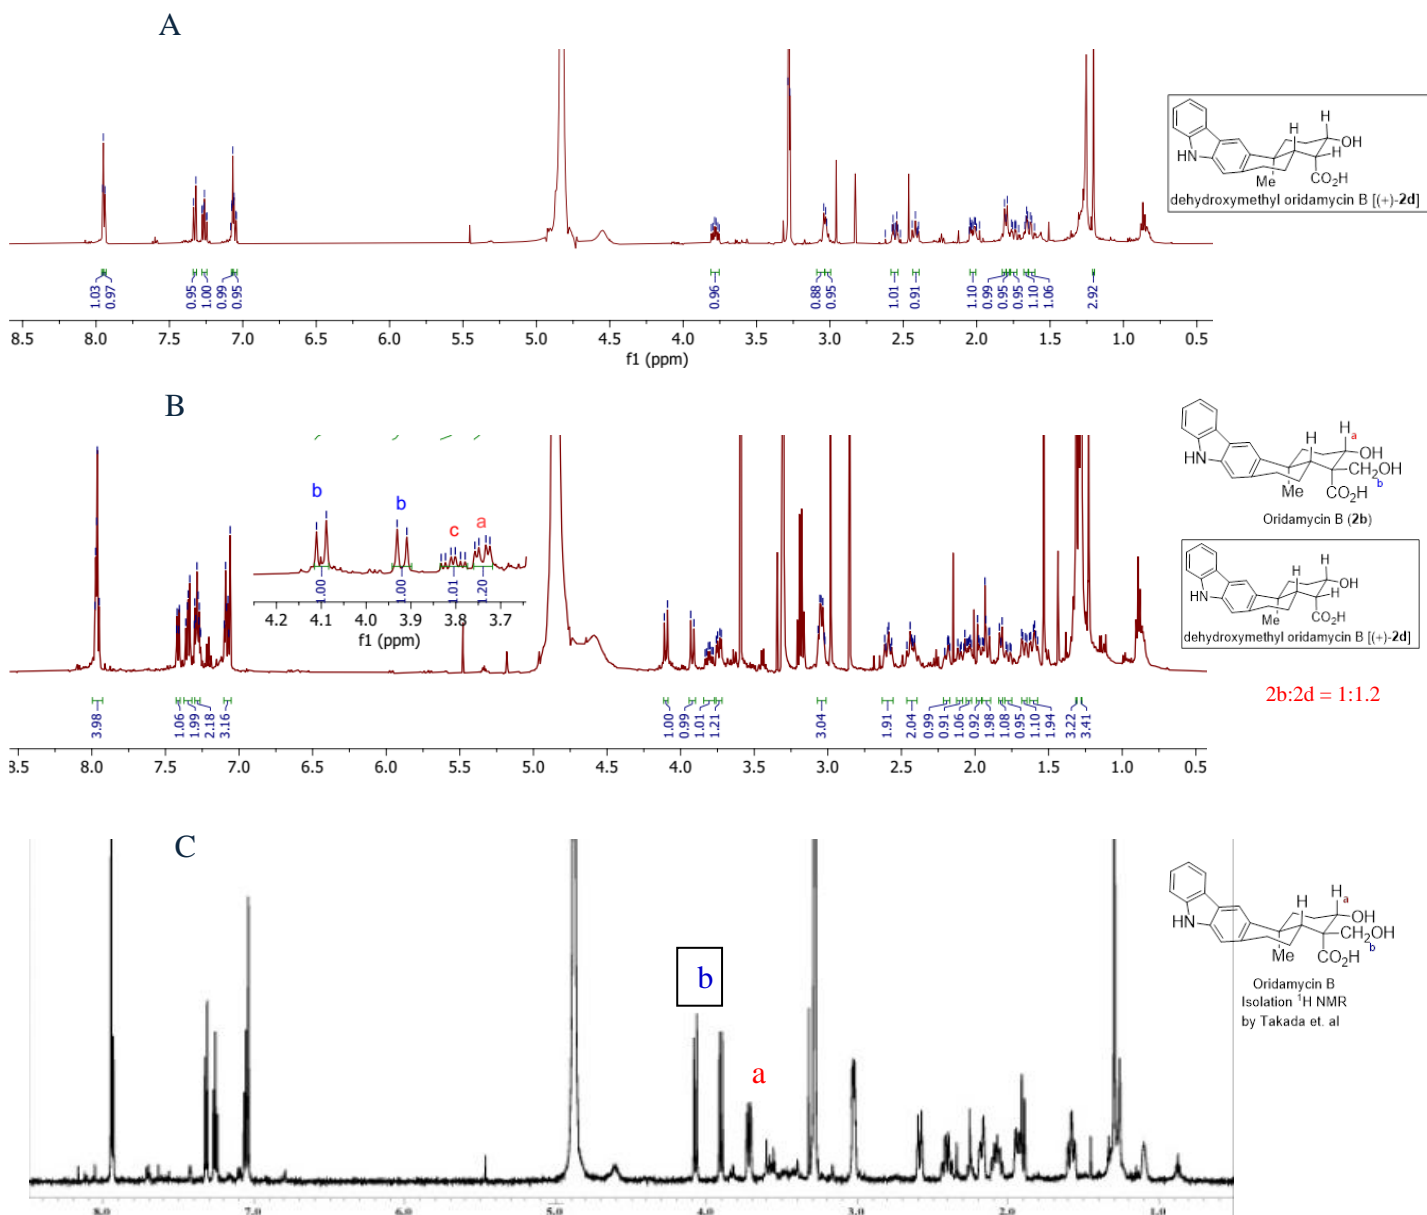

- A-  $^1\text{H}$  NMR of dehydroxymethyl oridamycin B[(+)-**2d**] in 500 MHz ( $\text{CD}_3\text{OD}$ ).
- B-  $^1\text{H}$  NMR of Crude reaction mixture on saponification of Oridamycin B methyl ester B [(+)-**23**] (Entry No. 8, Table 5) in 500 MHz ( $\text{CD}_3\text{OD}$ ) showing 1:1.2 ratio of Oridamycin B [**2b**] and dehydroxymethyl oridamycin B[(+)-**2d**]
- C-  $^1\text{H}$  NMR of isolated oridamycin B[**2b**] in 500 MHz ( $\text{CD}_3\text{OD}$ ) by Takada et al.<sup>6</sup>

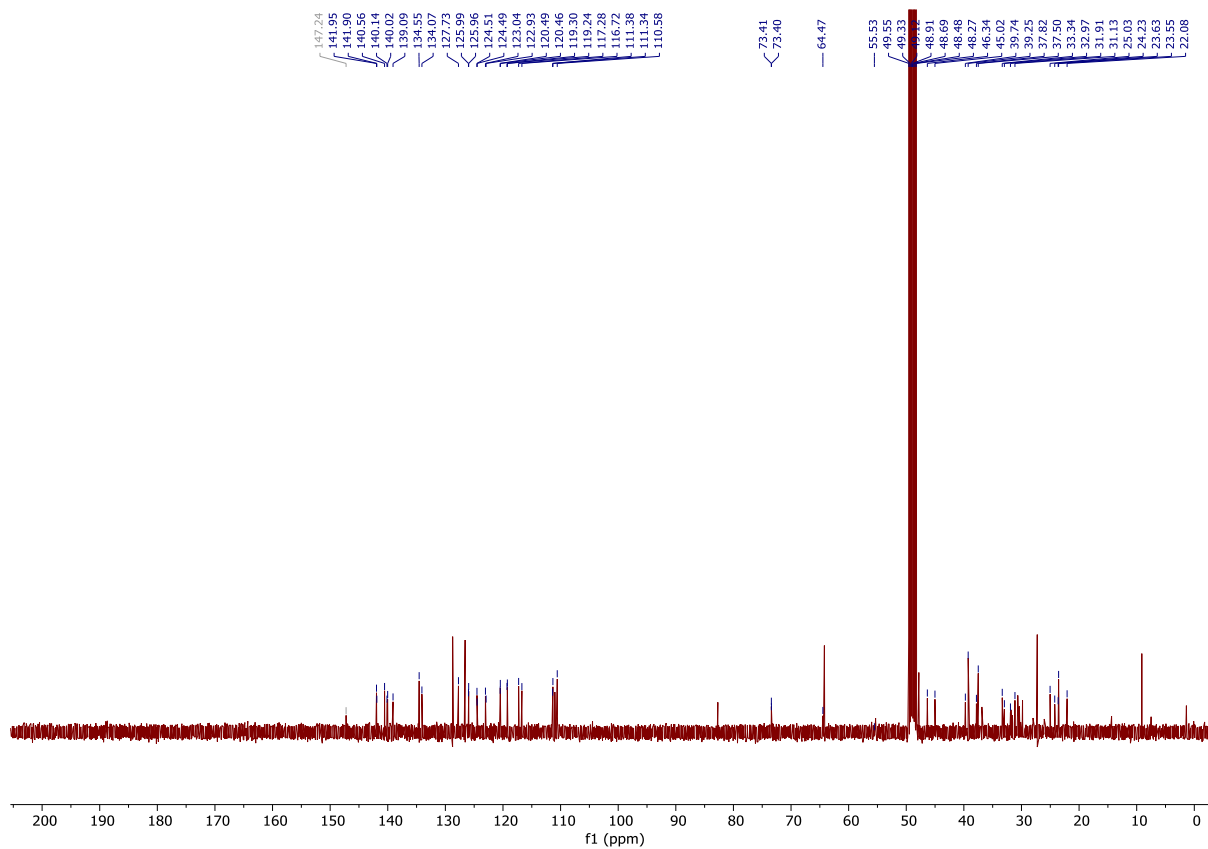

$^{13}\text{C}$  NMR of Crude reaction mixture on saponification of oridamycin B methyl ester B[(+)-**23**] (Entry No. 8, Table 5) showing 1:1.2 ratio of oridamycin B[**2b**] and dehydroxymethyl oridamycin B[(+)-**2d**] in 101 MHz ( $\text{CD}_3\text{OD}$ )

AB04-Oct-2023 12:08:22

IISER - KOLKATA

1: TOF MS ES+  
7.68e12

AB-SK-02-230 (0.053) Is (1.00,1.00) C<sub>23</sub>H<sub>25</sub>NO<sub>4</sub>Na

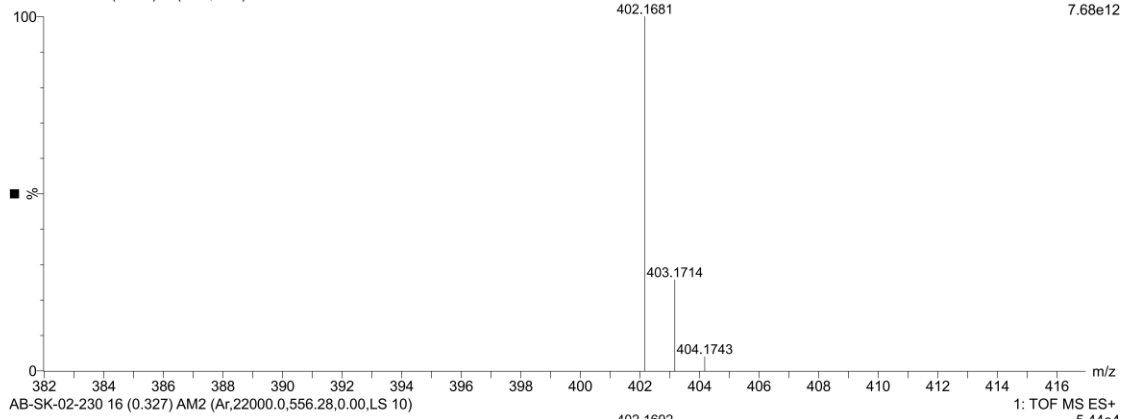

AB-SK-02-230 16 (0.327) AM2 (Ar,22000.0,556.28,0.00,LS 10)

1: TOF MS ES+  
5.44e4

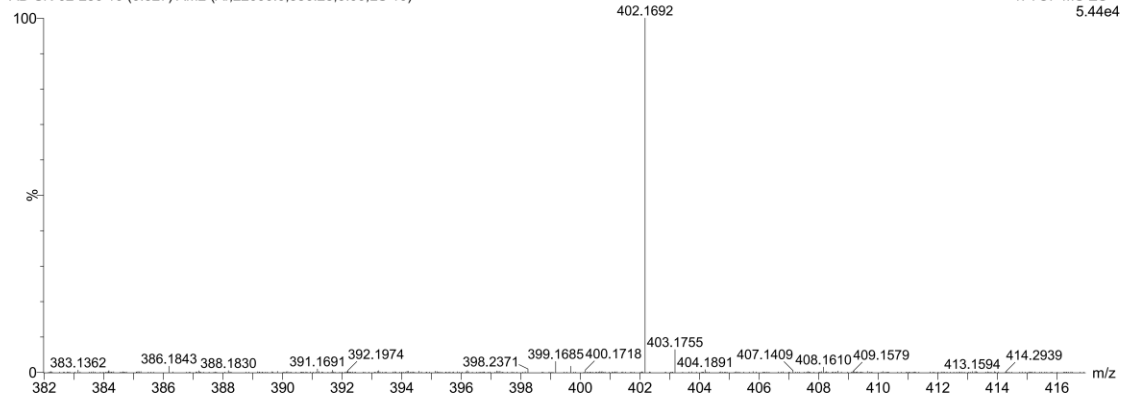

### HRMS Data for oridamycin B (2b) from Crude Saponification Reaction



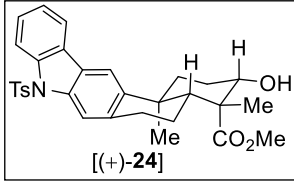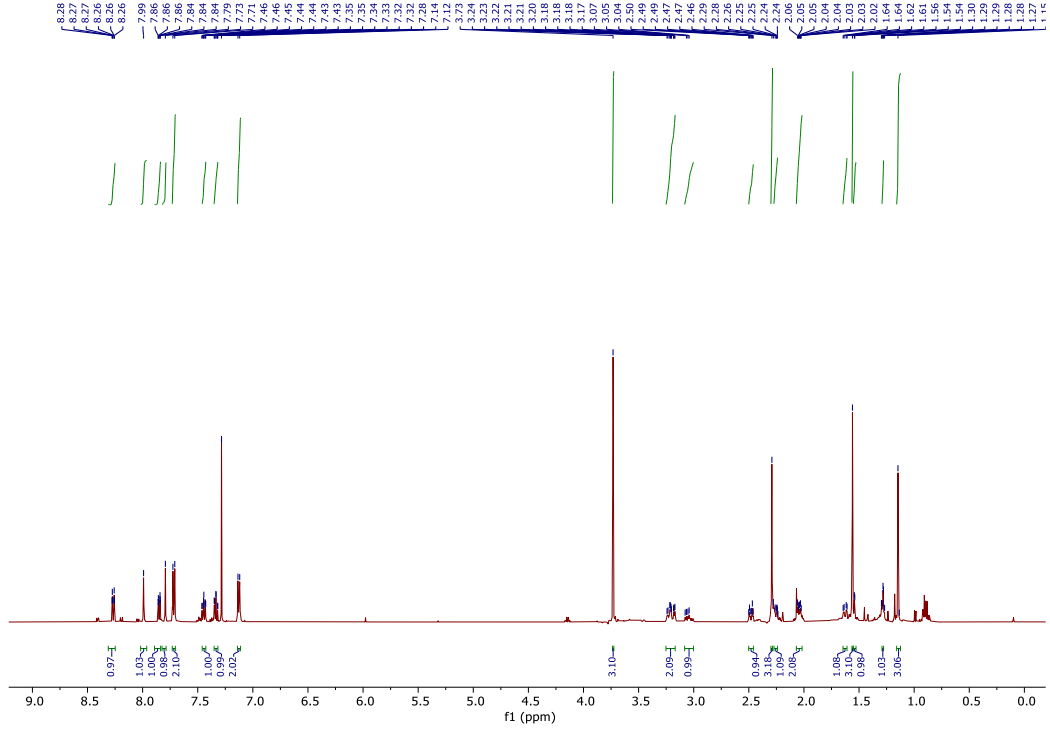

<sup>1</sup>H NMR (500 MHz, CDCl<sub>3</sub>) of (+)-24

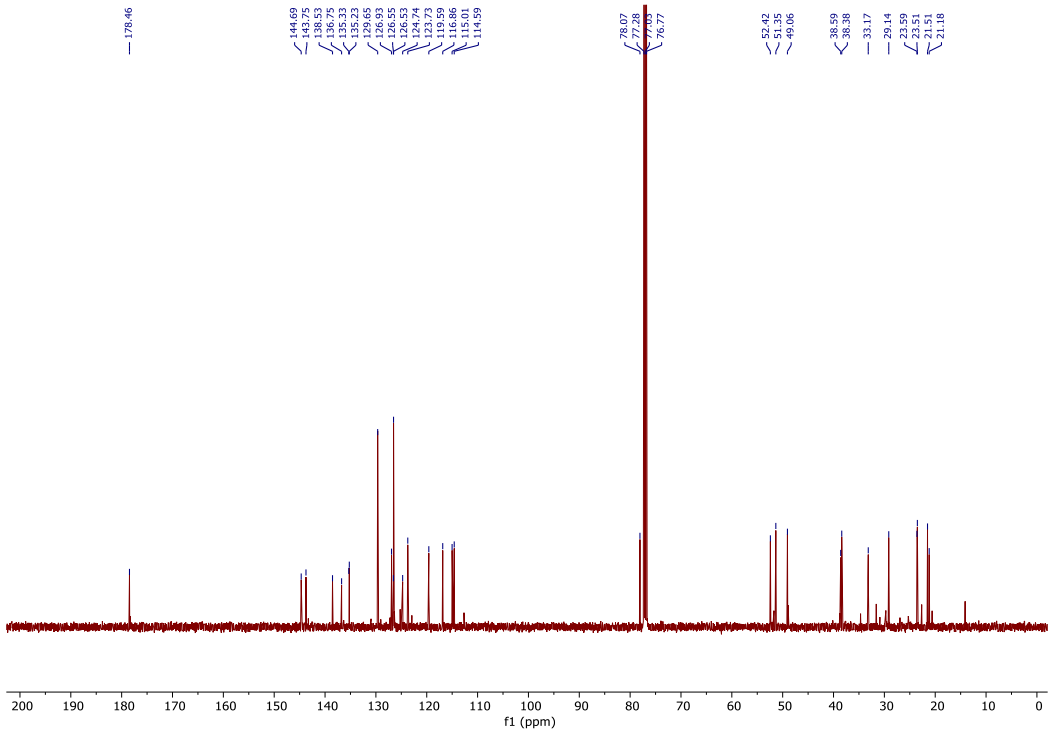

<sup>13</sup>C NMR (126 MHz, CDCl<sub>3</sub>) of (+)-24

AB09-Oct-2023 14:10:18

IISER - KOLKATA

1: TOF MS ES+  
6.67e12

AB-SK-02-232 (0.053) Is (1.00,1.00) C31H34NO5S

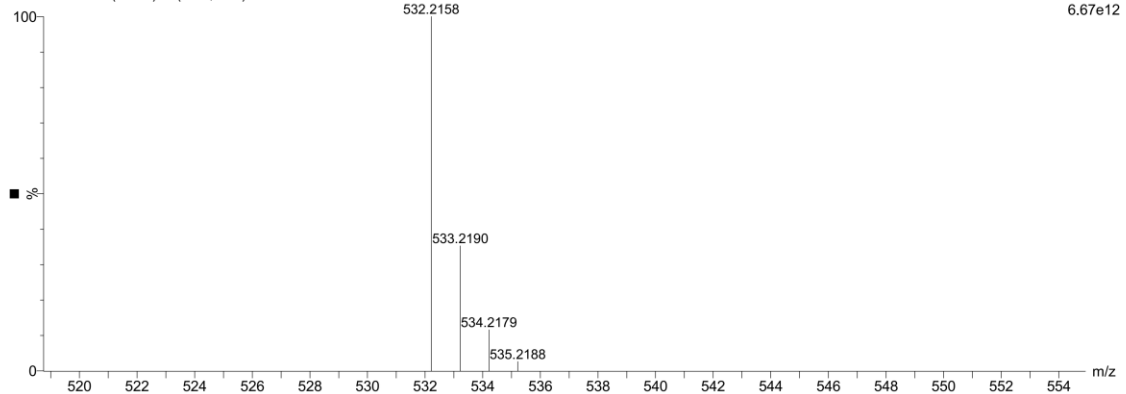

AB-SK-02-232 73 (1.449) AM2 (Ar,22000.0,556.28,0.00,LS 10)

1: TOF MS ES+  
1.64e4

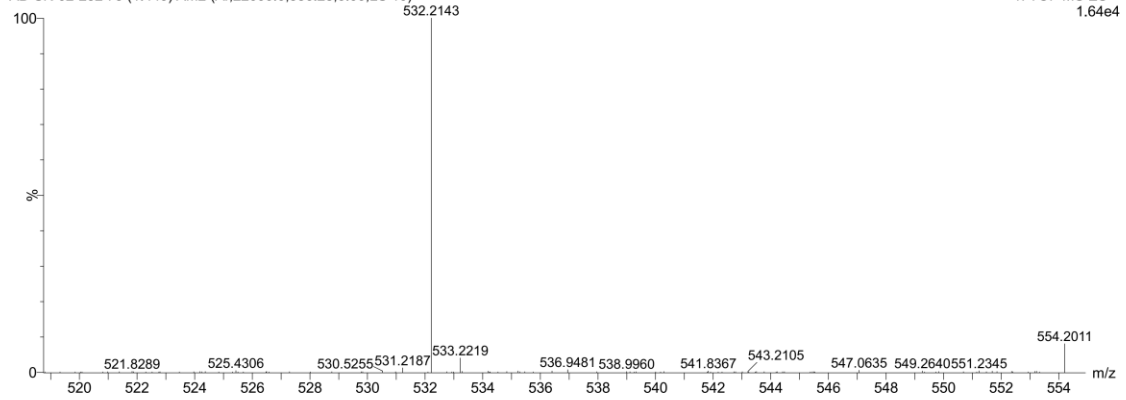

HRMS data of [(+)-24]

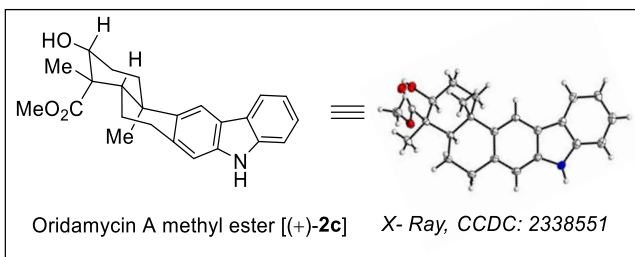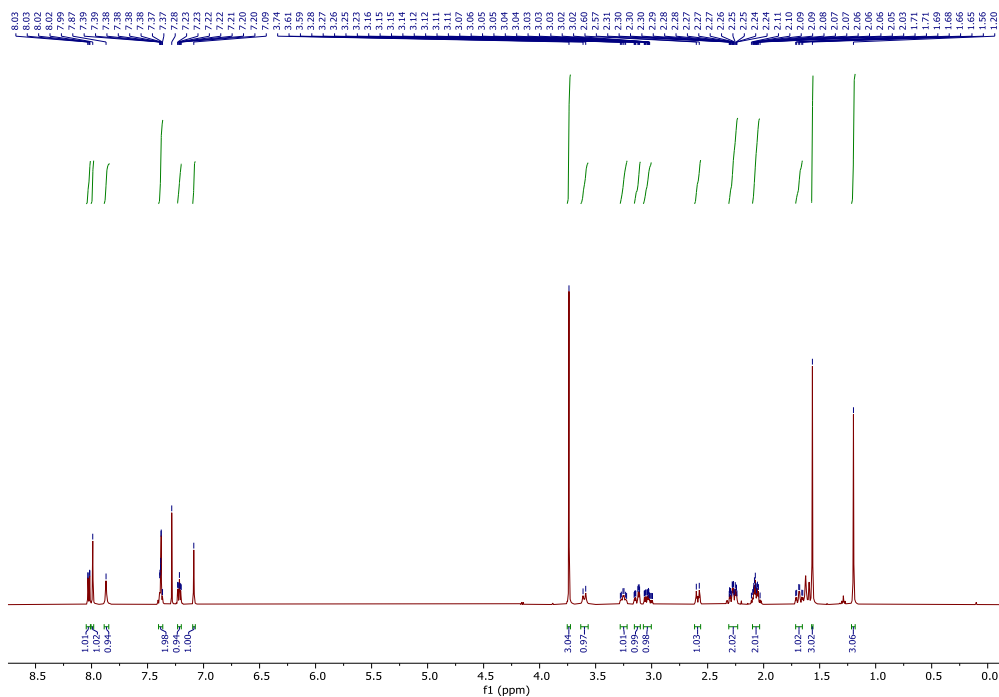

<sup>1</sup>H NMR (500 MHz, CDCl<sub>3</sub>) of oridamycin A methyl ester [(+)-2c]

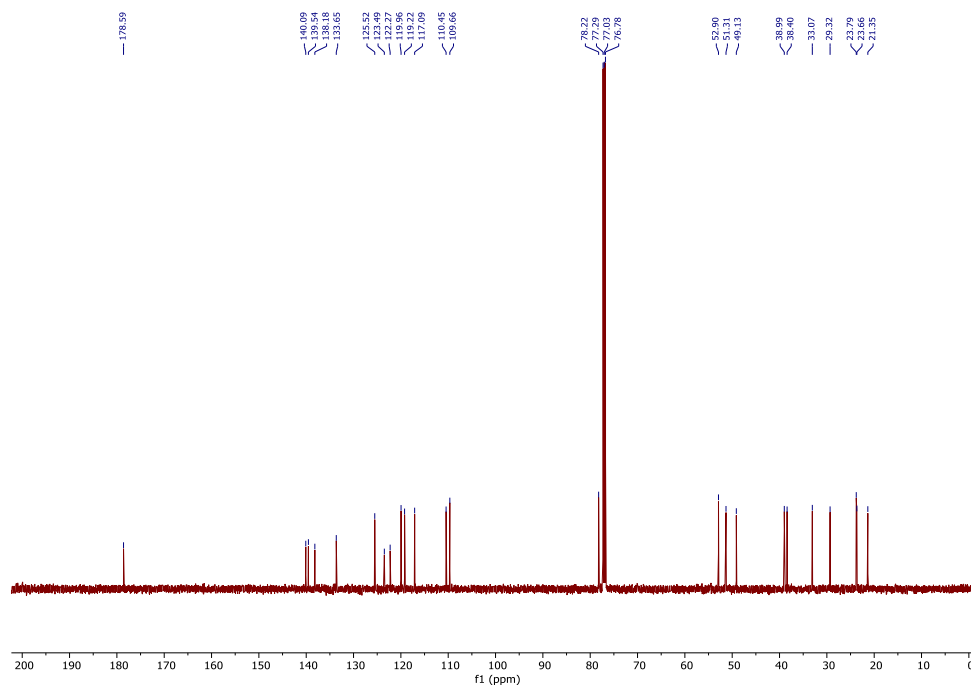

<sup>13</sup>C NMR (126 MHz, CDCl<sub>3</sub>) of (+)-oridamycin A methyl ester [(+)-2c]

# Display Report

## Analysis Info

Analysis Name D:\Data\User data\2022\FEB\lab\_sk\_02\_29.d  
Method Tune\_pos\_Standard.m  
Sample Name ab\_sk\_02\_29  
Comment

Acquisition Date 2/9/2022 12:48:31 PM

Operator IISER Kolkata  
Instrument maXis impact 8282001.00127

## Acquisition Parameter

|             |          |                      |          |                  |           |
|-------------|----------|----------------------|----------|------------------|-----------|
| Source Type | ESI      | Ion Polarity         | Positive | Set Nebulizer    | 0.5 Bar   |
| Focus       | Active   | Set Capillary        | 3400 V   | Set Dry Heater   | 200 °C    |
| Scan Begin  | 50 m/z   | Set End Plate Offset | -500 V   | Set Dry Gas      | 4.0 l/min |
| Scan End    | 1000 m/z | Set Charging Voltage | 2000 V   | Set Divert Valve | Source    |
|             |          | Set Corona           | 0 nA     | Set APCI Heater  | 0 °C      |

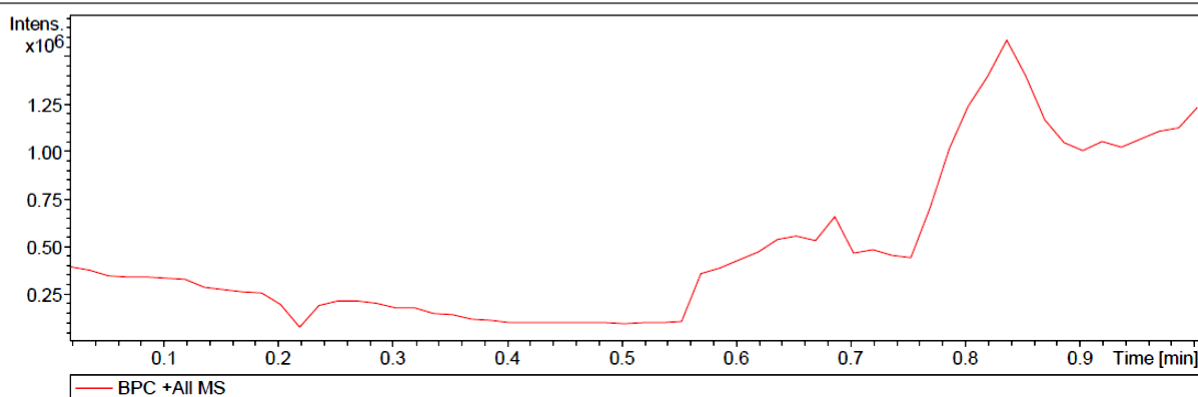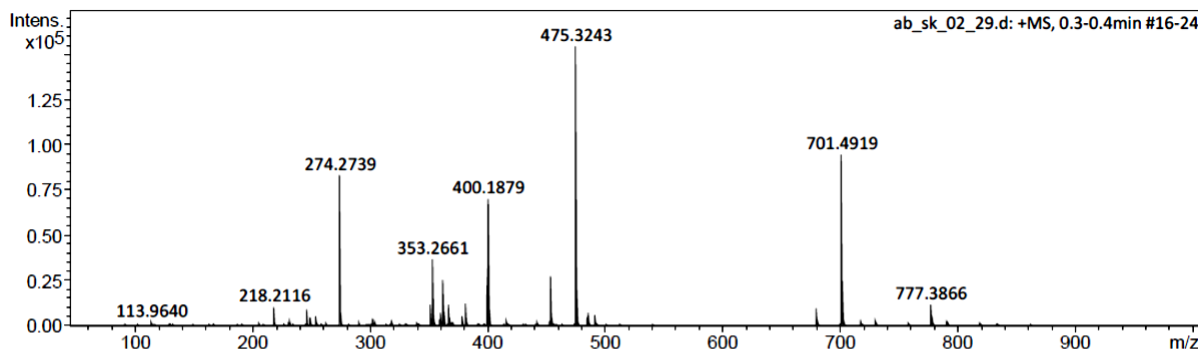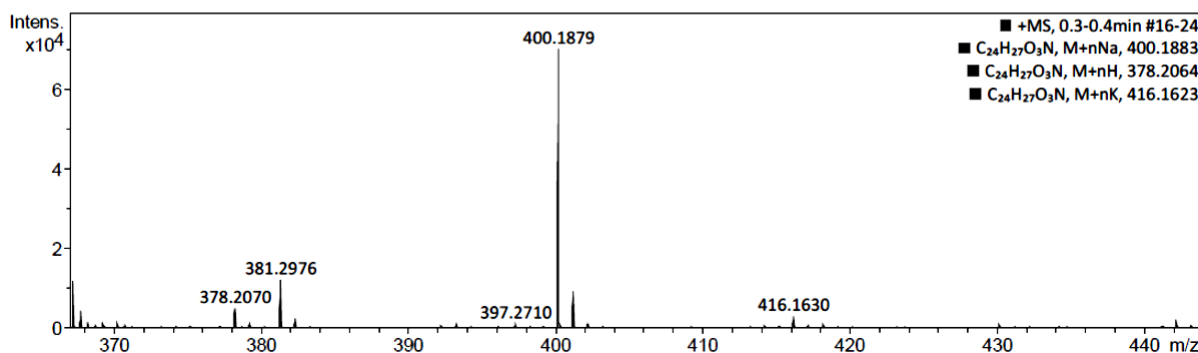

HRMS data of oridamycin A methyl ester [(+)-2c]

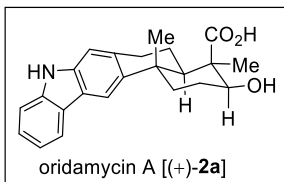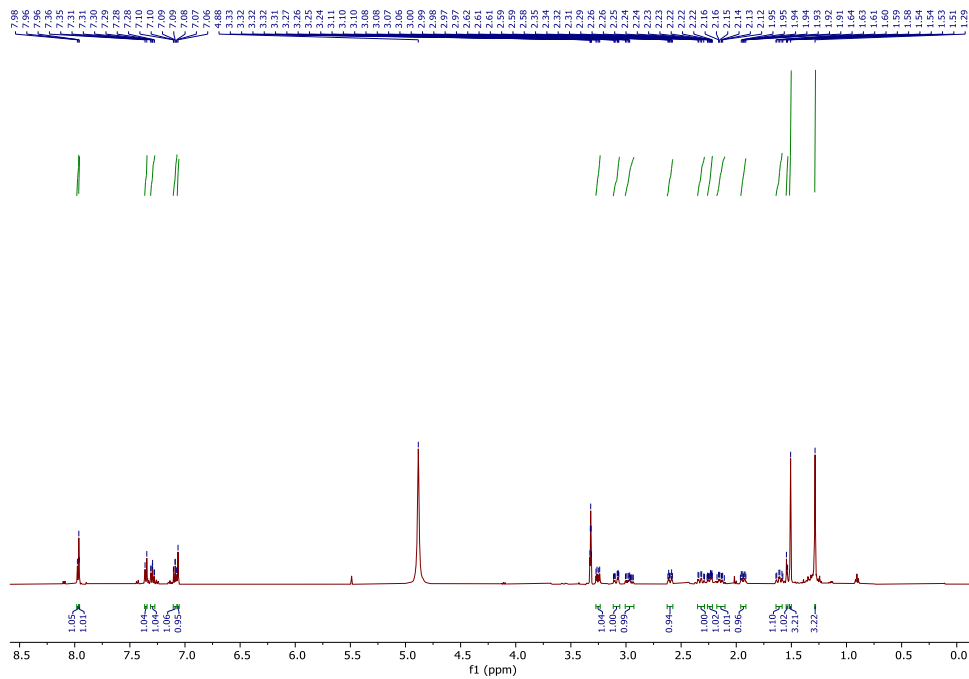

<sup>1</sup>H NMR (500 MHz, CDCl<sub>3</sub>) of oridamycin A [(+)-2a]

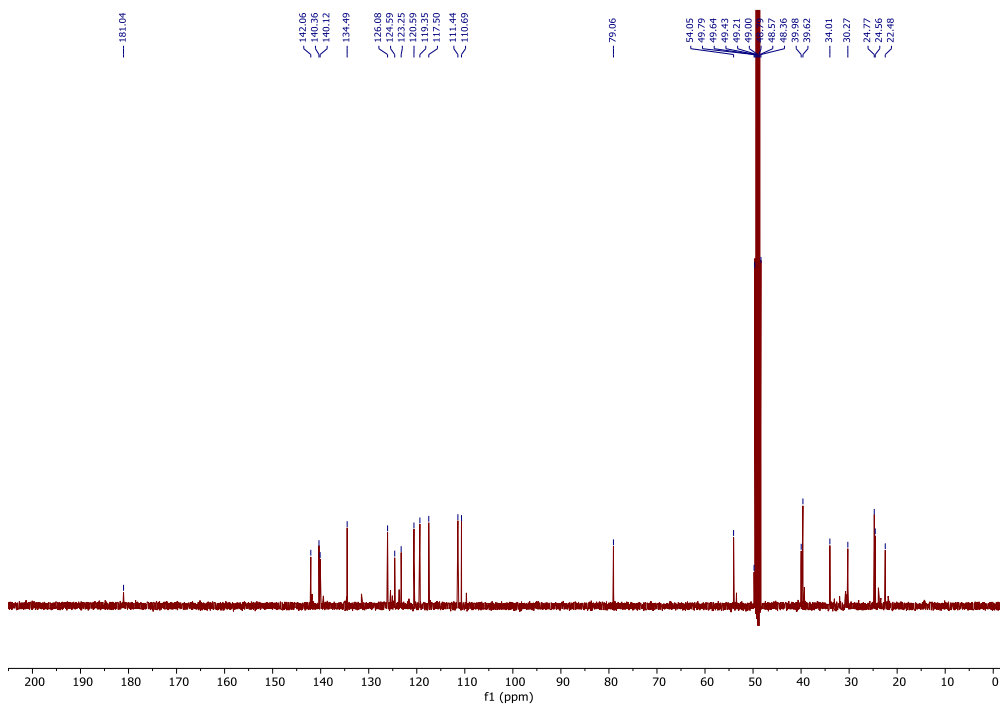

<sup>13</sup>C NMR (101 MHz, CDCl<sub>3</sub>) of (+)-oridamycin A [(+)-2a]

AB28-Dec-2023 12:12:57

IISER - KOLKATA

AB-SK-02-250 (0.087) Is (1.00,1.00) C<sub>23</sub>H<sub>26</sub>NO<sub>3</sub>

1: TOF MS ES+  
7.70e12

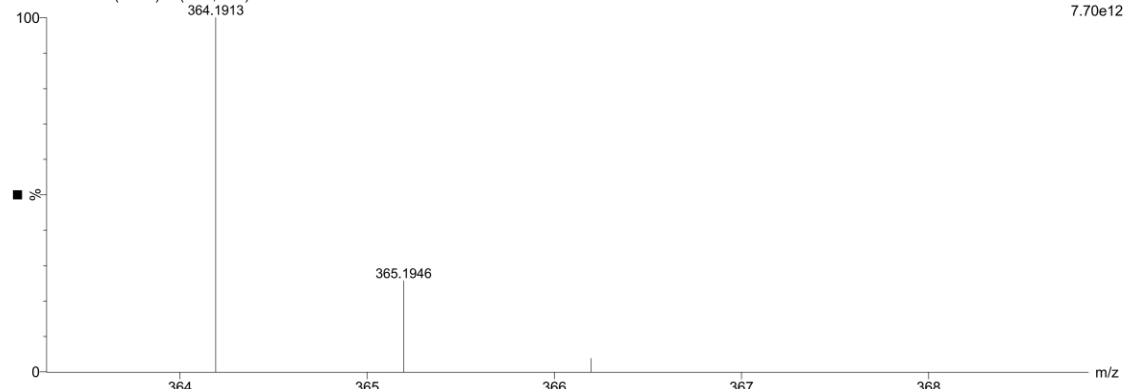

AB-SK-02-250 3 (0.087) AM (Cen,4, 80.00, Ar,10000.0,0.00,0.00)

1: TOF MS ES+  
3.22e5

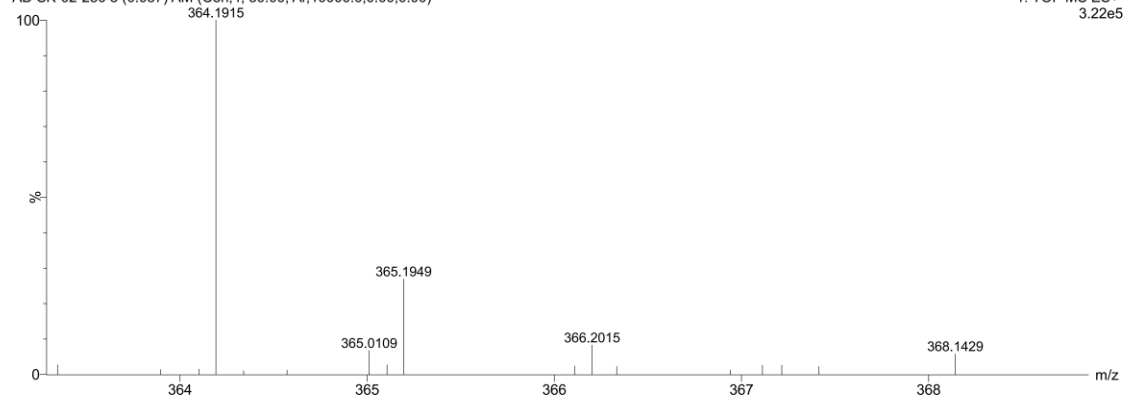

HRMS data of oridamycin A [(+)-**2a**]
